# Supplementary material for: Enantioselective bifunctional iminophosphorane catalyzed sulfa-Michael addition of alkyl thiols to unactivated β-substituted-α,β-unsaturated esters
Source: Royal Society of Chemistry journal article supplement (doi:10.1039/c6sc02878k), 2016-09-14
Supplement: c6sc02878k1.pdf [file c6sc02878k1.pdf]

*Supplementary information for*

# **Enantioselective Bifunctional Iminophosphorane Catalyzed Sulfa-Michael Addition of Alkyl Thiols to Unactivated $\beta$ -Substituted- $\alpha,\beta$ -Unsaturated Esters**

Jinchao Yang, Alistair J. M. Farley and Darren J. Dixon

*Department of Chemistry, Chemistry Research Laboratory,*

*University of Oxford, 12 Mansfield Road,*

*Oxford, OX1 3TA, UK*

|          |                                                                                         |           |
|----------|-----------------------------------------------------------------------------------------|-----------|
| <b>1</b> | <b>Supplementary Methods</b> .....                                                      | <b>2</b>  |
| 1.1      | General Information .....                                                               | 2         |
| 1.2      | Synthesis and characterization of catalysts and precursors.....                         | 3         |
| 1.3      | Synthesis of $\beta$ -Substituted $\alpha,\beta$ -Unsaturated Esters 2 .....            | 7         |
| 1.4      | Optimisation of conditions for the Sulfa-Michael addition .....                         | 9         |
| 1.5      | Synthesis and Characterisation of $\beta$ -Substituted, $\beta$ -Mercaptoesters 4 ..... | 10        |
| 1.6      | Preparative scale SMA reaction with 1 mol% catalyst .....                               | 20        |
| 1.7      | Derivatisation of $\beta$ -Mercaptoester products .....                                 | 21        |
| 1.8      | Determination of Absolute Stereochemistry .....                                         | 23        |
| <b>2</b> | <b>References</b> .....                                                                 | <b>24</b> |
| <b>3</b> | <b>Supplementary Data</b> .....                                                         | <b>25</b> |
| 3.1      | Copies of NMR spectra .....                                                             | 25        |
| 3.2      | Copies of HPLC and GC spectra.....                                                      | 51        |

# 1 Supplementary Methods

## 1.1 General Information

### Solvents and Reagents

Concentration under reduced pressure was performed by rotary evaporation at the appropriate pressure and temperature. Reagents used were obtained from commercial suppliers or purified according to standard procedures. Petroleum ether refers to distilled light petroleum of fraction 30 - 40 °C. Anhydrous toluene, tetrahydrofuran, dichloromethane and diethyl ether were dried by filtration through activated alumina (powder ~150 mesh, pore size 58 Å, basic, Sigma-Aldrich) columns. Dimethyl sulfoxide and dimethylformamide were used as supplied. Deuterated solvents were used as supplied.

### Chromatography

Reactions were monitored by thin layer chromatography (TLC) using Merck silica gel 60 F<sub>254</sub> plates and visualized by fluorescence quenching under UV light. In addition, TLC plates were stained with potassium permanganate solution. Flash column chromatography (FCC) was performed on VWR 60 silica gel 40 - 63 µm using technical grade solvents that were used as supplied.

### Instrumentation

Melting points were obtained on a Leica Galen III Hot-stage melting point apparatus and microscope and on a Kofler hot block and are reported uncorrected. NMR spectra were recorded on a Bruker Spectrospin spectrometer operating at 200, 400 or 500 MHz (<sup>1</sup>H acquisitions), 100 or 125 MHz (<sup>13</sup>C acquisitions), 377 MHz (<sup>19</sup>F acquisitions) and 162 MHz (<sup>31</sup>P acquisitions). Chemical shifts ( $\delta$ ) are reported in ppm with the solvent resonance as the internal standard (e.g. Chloroform  $\delta$  7.27 ppm for <sup>1</sup>H and 77.0 ppm for <sup>13</sup>C). Coupling constants (*J*) are reported in hertz (Hz), and rounded to the nearest 0.5 Hz. Data are reported as follows: multiplicity [s = singlet, d = doublet, t = triplet, q = quartet, dd = doublet of doublets, ddd = doublet of doublets of doublets, td = triplet of doublets, m = multiplet, br = broad], coupling constants in Hz, integration. Two-dimensional spectroscopy (COSY, HSQC

and HMBC) was used to assist in the assignment and the data is not reported. High-resolution mass spectra (ESI) were recorded on Bruker  $\mu$ TOF mass spectrometer. Infrared spectra were recorded on a Bruker Tensor 27 FT-IR spectrometer as a thin film. Only selected maximum absorbances are reported. Optical rotations were recorded using a Perkin Elmer 341 polarimeter;  $[\alpha]_D^T$  values are reported in  $10^{-1}$  deg  $\text{cm}^2 \text{g}^{-1}$ ; concentrations (c) are quoted in g/100 mL; D refers to the D-line of sodium (589 nm); temperatures (T) are given in degrees Celsius ( $^{\circ}\text{C}$ ). (+) and (–) compound number prefixes indicate the sign of the optical rotation. The enantiomeric excesses were determined by HPLC analysis on an Agilent 1200 Series instrument employing a chiral stationary phase column specified in the individual experiment and by comparing the samples with the appropriate racemic mixtures.

## 1.2 Synthesis and characterization of catalysts and precursors

Catalysts **1a**<sup>1</sup> and **1b-d**<sup>2</sup> were prepared according to literature procedures.

### 1.2.1 Synthesis of Isothiocyanate Precursors to Catalysts 1b – g

#### General Procedure A for the synthesis of isothiocyanate precursors

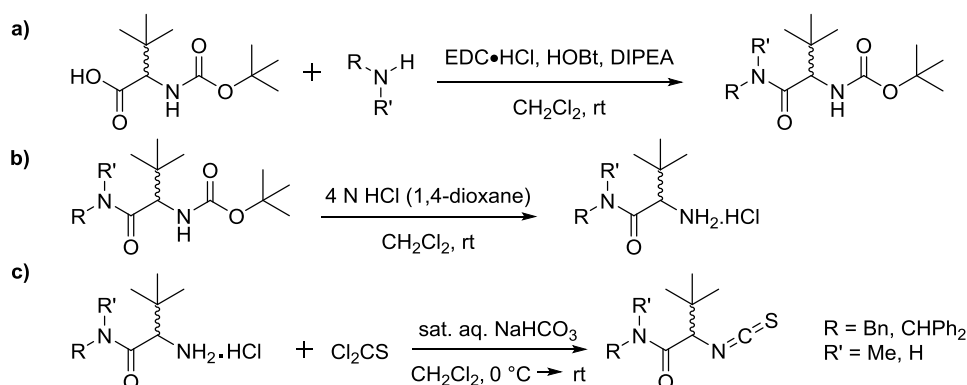

According to a literature procedure,<sup>3</sup>

a) To a stirred solution of EDC hydrochloride (295 mg, 1.54 mmol, 1.10 eq) and 1-hydroxybenzotriazole hydrate (208 mg, 1.54 mmol, 1.10 eq) in  $\text{CH}_2\text{Cl}_2$  (10 mL) under a  $\text{N}_2$  atmosphere at rt was added *N,N*-diisopropylethylamine (0.29 mL, 2.1 mmol, 1.5 eq) and the corresponding *amine* (1.54 mmol, 1.10 eq) sequentially. Boc-*L-tert* leucine (324 mg, 1.4 mmol, 1.00 eq) was added in one portion and the reaction mixture was stirred for 20 h. The reaction was diluted with  $\text{Et}_2\text{O}$  (10 mL), washed with 0.5 N HCl (2 x 10 mL) and the aqueous phase extracted with  $\text{Et}_2\text{O}$  (5 mL). The combined organic was washed with sat. aq.  $\text{NaHCO}_3$

(10 mL) and brine (10 mL), dried (Na<sub>2</sub>SO<sub>4</sub>), filtered and concentrated *in vacuo* to afford the product, which was used crude without further purification.

b) To a vigorously stirred solution of the crude product in CH<sub>2</sub>Cl<sub>2</sub> (5.0 mL) under a N<sub>2</sub> atmosphere at 0 °C was added 4 N HCl in 1,4-dioxane (3.4 mL, 13.4 mmol, 9.6 eq) over 15 min. The reaction mixture was stirred for 3.5 h and concentrated *in vacuo* to afford the product which was used crude without further purification.

c) To a vigorously stirred solution of the crude product in CH<sub>2</sub>Cl<sub>2</sub> (20 mL) under a N<sub>2</sub> atmosphere at 0 °C was added sat. aq. NaHCO<sub>3</sub> (20 mL), and the biphasic mixture was stirred for 20 min. Stirring was stopped and thiophosgene (160 μL, 2.10 mmol, 1.5 eq) was added to the organic layer. Immediately, vigorous stirring was restored and the mixture allowed to warm to rt over 30 min. The organic phase was extracted with CH<sub>2</sub>Cl<sub>2</sub> (2 x 10 mL), washed with brine (10 mL), dried (Na<sub>2</sub>SO<sub>4</sub>), filtered and concentrated *in vacuo* to afford the crude product.

#### (2*R*)-*N*-(Diphenylmethyl)-2-isothiocyanato-3,3-dimethylbutanamide **6**

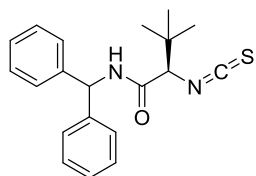

*N*-Boc-*D*-*tert*-leucine (323 mg, 1.40 mmol, 1.00 eq) was reacted with benzhydrylamine (282 μL, 1.54 mmol, 1.10 eq) according to General Procedure A to afford the title compound **6** as a pale yellow amorphous solid in 89% yield (421 mg).

[ $\alpha$ ]<sub>D</sub><sup>20</sup> = -40.5 (*c* 1.00, CHCl<sub>3</sub>), lit [ $\alpha$ ]<sub>D</sub><sup>20</sup> = +47.5 (*c* 0.72, CHCl<sub>3</sub>) for (*S*)-**6**;<sup>2</sup> all other characterisation data are in the accordance to that published in the literature.<sup>2</sup>

### 1.2.2 Synthesis of Azide Precursors to Catalysts 1b-g

*N*-Boc amino azides **7** and *ent*-**8** were synthesised according to literature procedures.<sup>1</sup>

#### General Procedure B for the synthesis of azide precursors to catalysts 1b-1g

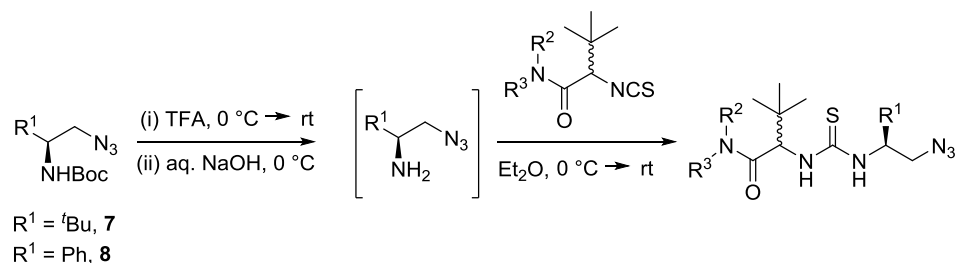

To the *N*-Boc protected amino azide **7** or **8** (0.77 mmol, 1.0 eq) at 0 °C was added trifluoroacetic acid (0.50 mL, 6.5 mmol) dropwise. The reaction mixture was warmed to rt and stirred for 2 h, and the volatiles removed by N<sub>2</sub> stream. The crude material was dissolved in Et<sub>2</sub>O/H<sub>2</sub>O (1:1 v/v, 8 mL) and adjusted to pH 14 by the addition of sodium hydroxide at 0 °C. The organic phase was extracted using Et<sub>2</sub>O (2 x 5 mL), washed with brine (5 mL), dried (MgSO<sub>4</sub>), filtered, and concentrated to 4 mL under a N<sub>2</sub> stream. The solution was cooled to 0 °C and the corresponding *isothiocyanate* (0.70 mmol, 1.0 eq) added. The reaction mixture was then warmed to rt and stirred for 24 h. Volatiles were removed by N<sub>2</sub> stream and the crude product was purified by FCC to afford the corresponding azide.

#### (2*R*)-2-([(2*S*)-1-Azido-3,3-dimethylbutan-2-yl]carbamoithioyl)amino)-*N*-(diphenylmethyl)-3,3-dimethylbutanamide **9**

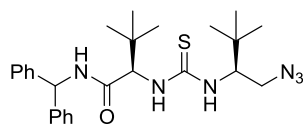

Azide **7** (185 mg, 0.77 mmol, 1.10 eq) was reacted with isothiocyanate **6** (237 mg, 0.70 mmol, 1.00 eq) according to General Procedure B. The reaction mixture was purified by FCC (petroleum ether/EtOAc = 4/1 to 3/2) to afford the title compound **9** as a colourless solid in 60% yield (202 mg).

**M.P.** = 227-230 °C;  $[\alpha]_D^{23} = +4.1$  (*c* 1.00, CHCl<sub>3</sub>); **<sup>1</sup>H NMR** (MeOD-*d*<sub>4</sub>, 400 MHz)  $\delta$  (ppm): 8.76 (d, *J* = 8.0 Hz, 1 H), 7.42 - 7.04 (m, 10 H), 6.19 (d, *J* = 8.0 Hz, 1 H), 5.01 (s, 1 H), 4.66 (m, 1 H), 3.55 (dd, *J* = 13.0, 4.0 Hz, 1 H), 3.32 (dd, *J* = 13.0, 8.0 Hz, 1 H), 1.01 (s, 18 H); **<sup>13</sup>C NMR** (MeOD-*d*<sub>4</sub>, 125 MHz)  $\delta$  (ppm): 186.2, 172.7, 143.2, 142.9, 129.7, 129.5, 129.4, 128.8, 128.6, 128.3, 66.6, 63.1, 58.4, 53.1, 36.1, 35.8, 27.5, 27.4; **HRMS** (ESI+) exact mass

calculated for  $[M+Na]^+$  ( $C_{26}H_{36}N_6NaOS$ ) requires  $m/z$  503.2564, found  $m/z$  503.2556; **IR** (film)  $\nu_{max}/cm^{-1}$ : 3304 (thiourea/amide NH), 2960, 2099, 1637 (C=O), 1533 (C=S), 1222, 1100, 756, 698.

**(2R)-2-([(2S)-1-azido-3,3-dimethylbutan-2-yl]carbamothioyl)amino)-N-benzyl-3,3-dimethylbutanamide 10**

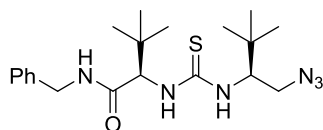

Azide **7** (185 mg, 0.77 mmol, 1.10 eq) was reacted with (2R)-N-benzyl-2-isothiocyanato-N,3,3-trimethylbutanamide<sup>2</sup> (183 mg, 0.70 mmol, 1.00 eq) according to General Procedure B. The reaction mixture was purified by FCC (petroleum ether/EtOAc = 4/1 to 3/2) to afford the title compound **10** as an off white solid in 50% yield (154 mg).

**M.P.** = 164 - 166 °C;  $[\alpha]_D^{23}$  = -26.0 (*c* 1.0,  $CHCl_3$ ); **<sup>1</sup>H NMR** (MeOD- $d_4$ , 400 MHz)  $\delta$  (ppm): 8.39 (br. s, 1 H), 7.31 - 7.18 (m, 5 H), 4.95 (s, 1 H), 4.65 - 4.57 (m, 1 H), 4.40 - 4.30 (m, 2 H), 3.50 (dd, *J* = 12.5, 4.0 Hz, 1 H), 3.34 - 3.26 (m, 1 H), 1.00 (s, 9 H), 0.96 (s, 9 H); **<sup>13</sup>C NMR** (100 MHz, MeOD- $d_4$ )  $\delta$  (ppm): 184.5, 171.7, 138.4, 128.0, 127.4, 126.7, 65.3, 61.5, 51.6, 42.6, 34.5, 34.3, 26.0, 25.8; **HRMS** (EI+) exact mass calculated for  $[M+Na]^+$  ( $C_{20}H_{32}N_6NaOS$ ) requires  $m/z$  427.2258, found  $m/z$  427.2234; **IR** (film)  $\nu_{max}/cm^{-1}$ : 3272, 2963, 2095, 1644, 1532, 697.

**(2R)-2-([(1S)-2-Azido-1-phenylethyl]carbamothioyl)amino)-N-(diphenylmethyl)-3,3-dimethylbutanamide 11**

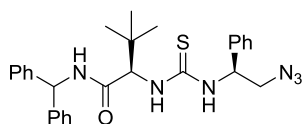

Azide **8** (403 mg, 1.54 mmol, 1.10 eq) was reacted with isothiocyanate **6** (237 mg, 1.40 mmol, 1.00 eq) according to General Procedure B. The reaction mixture was purified by FCC (petroleum ether/EtOAc = 4/1 to 3/2) to afford the title compound **11** as a colourless solid in 60% yield (420 mg).

**M.P.** = 188-190 °C;  $[\alpha]_D^{23}$  = +23.4 (*c* = 1.02,  $CHCl_3$ ); **<sup>1</sup>H NMR** (MeOD- $d_4$ , 400 MHz)  $\delta$  (ppm): 8.87 (d, *J* = 8.5 Hz, 1H), 7.43 - 7.20 (m, 15 H), 6.22 (d, *J* = 8.5 Hz, 1 H), 5.73 (t, *J* = 6.0 Hz, 1 H), 4.95 (s, 1 H), 3.74 (dd, *J* = 12.5, 6.0 Hz, 1 H), 3.66 (dd, *J* = 12.5, 6.0 Hz, 1 H), 0.98 (s, 9 H); **<sup>13</sup>C NMR** (MeOD- $d_4$ , 100 MHz)  $\delta$  (ppm): 181.6, 171.6, 139.9, 139.0, 138.0,

128.7, 128.5, 128.3, 128.3, 127.8, 127.7, 127.5, 127.1, 127.0, 65.4, 57.6, 57.3, 55.4, 34.7, 26.3; **HRMS** (ES+) exact mass calculated for  $[M+Na]^+$  ( $C_{26}H_{36}N_6NaOS$ ) requires  $m/z$  523.2358, found  $m/z$  523.2237; **IR** (film)  $\nu_{max}/cm^{-1}$ : 3236 (thiourea/amide NH), 2970, 2107, 1666 (C=O), 1532 (C=S), 1508, 1339, 1279, 1100, 751, 699, 644, 609.

### General Procedure C for the *in situ* Generation of Iminophosphorane Catalysts

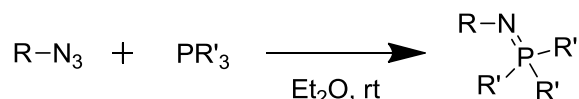

To the corresponding *organoazide* (0.020 mmol, 1.0 eq) and *phosphine* (0.020 mmol, 1.0 eq) under an Ar atmosphere was added  $Et_2O$  (0.1 mL), and the reaction mixture was stirred at rt for 24 h. The iminophosphorane product was confirmed by LRMS and TLC, and the volatiles were removed by a  $N_2$  stream to yield the crude product, which was used as a catalyst without further purification.

### 1.3 Synthesis of $\beta$ -Substituted $\alpha,\beta$ -Unsaturated Esters 2

Crotonic esters **2a – e** are commercially available and were used as supplied.

#### General Procedure D for the synthesis of $\beta$ -substituted $\alpha,\beta$ -unsaturated esters **2g - m**

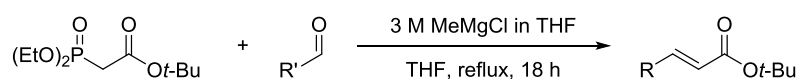

$MeMgCl$  (3 M in THF, 1.67 mL, 5.0 mmol) was added dropwise to a stirred solution *tert*-butyl diethylphosphonoacetate (1.15 mL, 5.00 mmol) in THF (10 mL) at rt and stirred for 15 min. A solution of the *aldehyde* (5.0 mmol, 1.0 eq) in THF (5 mL) was then added *via* cannula and the reaction mixture heated at reflux for 18 h whereupon the reaction mixture was cooled to rt, quenched with sat aq  $NH_4Cl$  (10 mL) and extracted with  $Et_2O$  ( $3 \times 10$  mL). The combined organic layers were then washed with brine (15 mL), dried and concentrated *in vacuo*. The crude products were purified by flash column chromatography (Petroleum ether :  $Et_2O$  mixtures) to afford the desired  $\beta$ -substituted  $\alpha,\beta$ -unsaturated esters.

$\beta$ -Substituted  $\alpha,\beta$ -unsaturated esters **2f**,<sup>4</sup> **2h**,<sup>6</sup> **2i**,<sup>7</sup> **2j**,<sup>8</sup> have been synthesised and characterised previously in the literature. Their physical and spectroscopic properties are in agreement to those reported.

#### ***tert*-Butyl (*E*)-pent-2-enoate **2g****

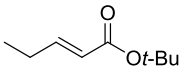 Synthesised on a 5.0 mmol scale according to General Procedure **D** using *tert*-butyl diethylphosphonoacetate (1.15 mL, 5.0 mmol) and propionaldehyde (0.39 mL, 5.5 mmol) to afford the title compound **2g** as a colourless oil (720 mg, 92% yield). All spectroscopic data are consistent to that published in the literature.<sup>5</sup>

#### ***tert*-Butyl (*E*)-5-((*tert*-butoxycarbonyl)amino)pent-2-enoate **2k****

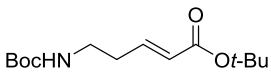 Synthesised on a 3.75 mmol scale according to General Procedure **D** using *tert*-butyl diethylphosphonoacetate (0.87 mL, 3.75 mmol) and *tert*-butyl (3-oxopropyl) carbamate<sup>9</sup> (645 mg, 3.75 mmol) to afford the title compound **2k** as a colourless oil (500 mg, 49% yield). All spectroscopic data are consistent to that reported in the literature.<sup>10</sup>

#### ***tert*-Butyl (*E*)-5-((*tert*-butyldimethylsilyl)oxy)pent-2-enoate **2l****

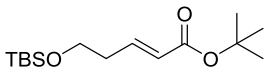 Synthesised on a 3.75 mmol scale according to General Procedure **D** using *tert*-butyl diethylphosphonoacetate (1.04 mL, 4.50 mmol) and 3-((*tert*-butyldimethylsilyl)oxy)propanal<sup>11</sup> (846 mg, 4.50 mmol) to afford the title compound **2l** as a colourless oil (660 mg, 51% yield). All spectroscopic data are consistent to that reported in the literature.<sup>12</sup>



## 1.4 Optimisation of Conditions for the Sulfa-Michael Addition

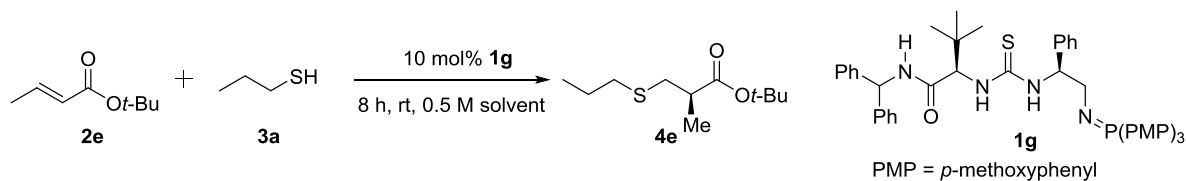

| Entry | Solvent                         | Yield / % <sup>a</sup> | er <sup>b</sup> |
|-------|---------------------------------|------------------------|-----------------|
| 1     | Toluene                         | 94                     | 92:8            |
| 2     | TBME                            | 92                     | 92:8            |
| 3     | Xylene                          | 91                     | 92:8            |
| 4     | THF                             | 89                     | 92:8            |
| 5     | EtOAc                           | 94                     | 92:8            |
| 6     | CHCl <sub>3</sub>               | 23                     | 84:16           |
| 7     | CH <sub>2</sub> Cl <sub>2</sub> | Trace                  | -               |
| 8     | Hexane                          | 92                     | 88:12           |
| 9     | DMF                             | 96                     | 52:48           |
| 10    | Et <sub>2</sub> O               | 95                     | 94:6            |

**Table SI.1:** Solvent optimization for the sulfa-Michael addition of 1-propanethiol **3a** (0.30 mmol) to *tert*-butyl crotonate **2e** (0.10 mmol), with 10 mol% catalyst **1g**. <sup>a</sup> Isolated yield. <sup>b</sup> Determined by HPLC analysis on a chiral stationary phase.

| Entry          | Temperature / °C | Time / h | Yield / % <sup>a</sup> | er <sup>b</sup> |
|----------------|------------------|----------|------------------------|-----------------|
| 1              | RT               | 8        | 95                     | 94:6            |
| 2 <sup>c</sup> | 0                | 24       | 94                     | 96:4            |
| 3 <sup>c</sup> | -15              | 72       | 94                     | 97:3            |

**Table SI.2:** Temperature optimization for the sulfa-Michael addition of 1-propanethiol **3a** (0.30 mmol) to *tert*-butyl crotonate **2e** (0.10 mmol), with 10 mol% catalyst **1g** in 0.5 M Et<sub>2</sub>O. <sup>a</sup> Isolated yield. <sup>b</sup> Determined by HPLC analysis on a chiral stationary phase. <sup>c</sup> Reaction performed with 0.20 mmol **2e**.

## 1.5 Synthesis and Characterisation of $\beta$ -Substituted, $\beta$ -Mercaptoesters 4

### General Procedure E for the Enantioselective Sulfa-Michael Addition of Alkyl Thiols to $\beta$ -Substituted $\alpha,\beta$ -Unsaturated Esters 4

Azide **11** (10.0 mg, 0.020 mmol, 0.10 eq) and tris(4-methoxyphenyl)phosphine (7.0 mg, 0.020 mmol, 0.10 eq) were stirred in diethyl ether (0.2 mL) under an argon atmosphere in a sealed vial at room temperature for 24 h. Formation of the *in situ* generated catalyst was confirmed by LRMS and TLC analysis and the volatiles were removed under a N<sub>2</sub> stream. To the crude catalyst was added sequentially Et<sub>2</sub>O (0.40 mL), the desired  $\beta$ -substituted  $\alpha,\beta$ -unsaturated ester **2** (0.20 mmol, 1.0 eq) under an Ar atmosphere. The reaction mixture was cooled to 0 °C, then the desired thiol **3** (0.60 mmol, 3.0 eq) was added and stirring was maintained for 24 h (or the time specified in the individual experiment as determined by TLC analysis). The reaction mixture was quenched by the addition of 1.0 M AcOH (in CH<sub>2</sub>Cl<sub>2</sub>, 0.1 mL), the volatiles were removed under a stream of N<sub>2</sub> and purification by flash column chromatography (petroleum ether / Et<sub>2</sub>O mixtures) afforded the  $\beta$ -mercaptoesters **4**.<sup>a</sup>

### Methyl (S)-3-(propylthio)butanoate **4a**

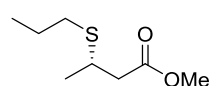

To a solution of methyl crotonate **2a** (21  $\mu$ L, 0.20 mmol, 1.0 eq) and **1g** (0.020 mmol, 0.10 eq) in toluene (0.40 mL) at RT was added 1-propanethiol **3a** (54  $\mu$ L, 0.60 mmol, 3.0 eq) according a modified General Procedure **E**. The product was purified by FCC (99:1 petrol: Et<sub>2</sub>O) to afford **4a** as a colourless oil in >99% yield (35.2 mg) and 81:19 er [determined by HPLC, chiralpak IA, hexane/isopropanol 99.5:0.5,  $\lambda$  220 nm, 1.0mL/min, t (major) = 12.67 min, t (minor) = 18.01 min].

$[\alpha]_D^{23} = +4.8$  (*c* 1.00, CHCl<sub>3</sub>); <sup>1</sup>H NMR (CDCl<sub>3</sub>, 400 MHz)  $\delta$  (ppm): 3.70 (s, 3 H), 3.24-3.16 (m, 1 H), 2.64 (dd, *J* = 15.5, 6.5 Hz, 1 H), 2.53 (t, *J* = 7.5 Hz, 2 H), 2.46 (dd, *J* = 15.5, 8.5 Hz, 1 H), 1.62 (sxt, *J* = 7.5 Hz, 2 H), 1.33 (d, *J* = 6.5 Hz, 3 H), 1.26 (t, *J* = 7.5 Hz, 3 H); <sup>13</sup>C NMR (CDCl<sub>3</sub>, 100 MHz)  $\delta$  (ppm): 172.0, 51.7, 42.2, 36.1, 32.7, 23.0, 21.5, 13.6; HRMS (ESI+) mass calculated for [M+Na]<sup>+</sup> (C<sub>8</sub>H<sub>16</sub>NaO<sub>2</sub>S) requires *m/z* 199.0763, found *m/z* 199.0757; IR (film)  $\nu_{\max}/\text{cm}^{-1}$ : 2963, 1738, 1437, 1222, 1161, 913, 734.

<sup>a</sup> Racemic products for HPLC/GC analysis were formed using a modification of General Procedure **E**, with 10 mol% BEMP (2-*tert*-butylimino-2-diethylamino-1,3-dimethylperhydro-1,3,2-diazaphosphorine) in 0.5 M toluene, and left until completion.

### Ethyl (S)-3-(propylthio)butanoate **4b**

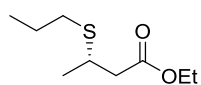

To a solution of ethyl crotonate **2b** (25  $\mu$ L, 0.20 mmol, 1.0 eq) and **1g** (0.020 mmol, 0.10 eq) in toluene (0.40 mL) at RT was added 1-propanethiol **3a** (54  $\mu$ L, 0.60 mmol, 3.0 eq) according to modified General Procedure **E**. The product was purified by FCC (99:1 petrol: Et<sub>2</sub>O) to afford **4b** as a colourless oil in 95% yield (36.1 mg) and 84:16 er [determined by HPLC, chiralpak IA, hexane/isopropanol 100:0,  $\lambda$  220 nm, 1.0 mL/min, t (minor) = 16.56 min, t (major) = 18.42 min].

$[\alpha]_D^{23} = +4.0$  (*c* 0.60, CHCl<sub>3</sub>); **<sup>1</sup>H NMR** (CDCl<sub>3</sub>, 400 MHz)  $\delta$  (ppm): 4.15 (q, *J* = 7.0 Hz, 2 H), 3.20 - 3.13 (m, 1 H), 2.61 (dd, *J* = 15.5, 6.0 Hz, 1 H), 2.55 - 2.48 (m, 2 H), 2.42 (dd, *J* = 15.5, 8.5 Hz, 1 H), 1.60 (sxt, *J* = 7.5 Hz, 2 H), 1.31 (d, *J* = 7.0 Hz, 3 H), 1.26 (d, *J* = 14.0 Hz, 3 H), 0.96 (t, *J* = 7.0 Hz, 3 H); **<sup>13</sup>C NMR** (CDCl<sub>3</sub>, 400 MHz)  $\delta$  (ppm): 171.6, 60.5, 42.4, 36.1, 32.7, 23.0, 21.4, 14.2, 13.5; **HRMS** (ESI+) mass calculated for [M+Na]<sup>+</sup> (C<sub>9</sub>H<sub>18</sub>NaO<sub>2</sub>S) requires *m/z* 213.0920, found *m/z* 213.0922; **IR** (film)  $\nu_{\max}/\text{cm}^{-1}$ : 2968, 1729, 1216, 1169, 754, 667.

### Isopropyl (S)-3-(propylthio)butanoate **4c**

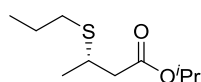

To a solution of isopropyl crotonate **2c** (25.6 mg, 0.20 mmol, 1.0 eq) and **1g** (0.020 mmol, 0.10 eq) in toluene (0.40 mL) at RT was added 1-propanethiol **3a** (54  $\mu$ L, 0.60 mmol, 3.0 eq) according to modified General Procedure **E**. The product was purified by FCC (99:1 petrol: Et<sub>2</sub>O) to afford **4c** as a colourless oil in >99% yield (41 mg) and 85:15 er [determined by HPLC, chiralpak AD-H, hexane/isopropanol 99:1,  $\lambda$  220 nm, 1.0 mL/min, t (major) = 7.45 min, t (minor) = 7.81 min].

$[\alpha]_D^{23} = +1.6$  (*c* 0.45, CHCl<sub>3</sub>); **<sup>1</sup>H NMR** (CDCl<sub>3</sub>, 400 MHz)  $\delta$  (ppm): 5.04 (spt, *J* = 6.5 Hz, 1 H), 3.19 (dqin, *J* = 8.0, 6.5 Hz, 1 H), 2.59 (dd, *J* = 15.0, 6.5 Hz, 1 H), 2.53 (t, *J* = 7.5 Hz, 2 H), 2.40 (dd, *J* = 15.0, 8.5 Hz, 1 H), 1.61 (sxt, *J* = 7.5 Hz, 2 H), 1.32 (d, *J* = 6.5 Hz, 3 H), 1.25 (d, *J* = 6.5 Hz, 6 H), 0.99 (t, *J* = 7.5 Hz, 3 H); **<sup>13</sup>C NMR** (CDCl<sub>3</sub>, 100 MHz)  $\delta$  (ppm): 171.1, 67.9, 42.7, 36.2, 32.6, 23.0, 21.8, 21.4, 13.6; **HRMS** (ESI+) mass calculated for [M+Na]<sup>+</sup> (C<sub>10</sub>H<sub>20</sub>NaO<sub>2</sub>S) requires *m/z* 227.1076, found *m/z* 227.1084; **IR** (film)  $\nu_{\max}/\text{cm}^{-1}$ : 2926, 1722, 1216, 1106, 755.

### Benzyl (S)-3-(propylthio)butanoate **4d**

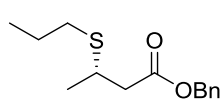

To a solution of benzyl crotonate **2d** (35.2 mg, 0.20 mmol, 1.0 eq) and **1g** (0.020 mmol, 0.10 eq) in toluene (0.40 mL) at RT was added 1-propanethiol **3a** (54  $\mu$ L, 0.60 mmol, 3.0 eq) according to modified General Procedure **E**. The product was purified by FCC (99:1 petrol: Et<sub>2</sub>O) to afford **4d** as a colourless oil in >99% yield (50.3 mg) and 81:19 er [determined by HPLC, chiralpak AD-H, hexane/isopropanol 99:1,  $\lambda$  220 nm, 1.0 mL/min, t (major) = 13.94 min, t (minor) = 15.87 min].

$[\alpha]_D^{23} = 0$  (c 0.62, CHCl<sub>3</sub>); **<sup>1</sup>H NMR** (CDCl<sub>3</sub>, 400 MHz)  $\delta$  (ppm): 7.38-7.34 (m, 5 H), 5.05 (s, 2 H), 3.13 - 3.10 (m, 1 H), 2.62 (dd,  $J = 15.5, 6.5$  Hz, 1 H), 2.44-2.40 (m, 3 H), 1.50 (sxt,  $J = 7.5$  Hz, 2 H), 1.23 (d,  $J = 7.0$  Hz, 3 H), 0.88 (t,  $J = 7.5$  Hz, 3 H); **<sup>13</sup>C NMR** (CDCl<sub>3</sub>, 100 MHz)  $\delta$  (ppm): 171.4, 135.8, 128.6, 128.3<sup>b</sup>, 66.4, 42.4, 36.1, 32.7, 23.0, 21.5, 15.3; **HRMS** (ESI+) mass calculated for [M+Na]<sup>+</sup> (C<sub>14</sub>H<sub>20</sub>NaO<sub>2</sub>S) requires  $m/z$  275.1076, found  $m/z$  275.1079; **IR** (film)  $\nu_{\max}/\text{cm}^{-1}$ : 2962, 1731, 1216, 1156, 753, 697, 668.

### *tert*-Butyl (S)-3-(propylthio)butanoate **4e**

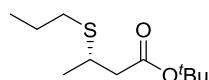

To a solution of *tert*-butyl crotonate **2e** (32  $\mu$ L, 0.20 mmol, 1.0 eq) and **1g** (0.020 mmol, 0.10 eq) in Et<sub>2</sub>O (0.40 mL) at -15 °C was added 1-propanethiol **3a** (54  $\mu$ L, 0.60 mmol, 3.0 eq) and stirring was maintained for 72 h according a modified modified General Procedure **E**. The product was purified by FCC (99:1 petrol: Et<sub>2</sub>O) to afford **4e** as a colourless oil in 94% yield (41 mg) and 97:3 er [determined by HPLC, chiralpak IA, hexane/isopropanol 100:0,  $\lambda$  220 nm, 1.0 mL/min, t (major) = 9.45 min, t (minor) = 11.34 min].

$[\alpha]_D^{23} = +5.5$  (c 1.85, CHCl<sub>3</sub>); **<sup>1</sup>H NMR** (CDCl<sub>3</sub>, 400 MHz)  $\delta$  (ppm): 3.22 – 3.10 (m, 1 H), 2.57-2.51 (m, 3 H), 2.34 (dd,  $J = 15.0, 8.5$  Hz, 1 H), 1.61 (sxt,  $J = 7.0$  Hz, 2 H), 1.46 (s, 9 H), 1.32 (d,  $J = 6.5$  Hz, 3 H), 1.26 (t,  $J = 7.0$  Hz, 3 H); **<sup>13</sup>C NMR** (CDCl<sub>3</sub>, 400 MHz)  $\delta$  (ppm): 170.9, 80.7, 43.6, 36.3, 32.6, 28.1, 23.0, 21.3, 13.6; **HRMS** (FI+) mass calculated for [M]<sup>+</sup> (C<sub>11</sub>H<sub>22</sub>O<sub>2</sub>S) requires  $m/z$  218.1341, found  $m/z$  218.1373; **IR** (film)  $\nu_{\max}/\text{cm}^{-1}$ : 2966, 1725, 1368, 1216, 1148, 753, 667.

<sup>b</sup> One of the ArCH is missing, probably due to overlap of the aromatic carbon signals.

### *tert*-Butyl (*S*)-3-(pentylthio)butanoate **4f**

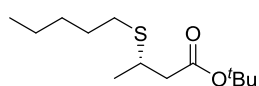

To a solution of *tert*-butyl crotonate **2e** (32  $\mu$ L, 0.20 mmol, 1.0 eq) and **1g** (0.020 mmol, 0.10 eq) in Et<sub>2</sub>O (0.40 mL) at 0 °C was added 1-pentanethiol **3b** (74  $\mu$ L, 0.60 mmol, 3.00 eq) according General Procedure **E**. The reaction mixture was purified by FCC (petroleum ether: Et<sub>2</sub>O 99:1) to afford **4f** as a colourless oil in 98% yield (48 mg) and 95:5 er [determined by HPLC, chiralpak IA hexane/isopropanol 100:0,  $\lambda$  220 nm, 1.0 mL/min, t (major) = 11.09 min, t (minor) = 13.30 min].

$[\alpha]_D^{23} = +4.8$  (*c* 1.57, CHCl<sub>3</sub>); **<sup>1</sup>H NMR** (CDCl<sub>3</sub>, 400 MHz)  $\delta$  (ppm): 3.19 - 3.10 (m, 1 H), 2.56 - 2.48 (m, 3 H), 2.32 (dd, *J* = 15.0, 8.5 Hz, 1 H), 1.63 - 1.53 (m, 2 H), 1.45 (s, 9 H), 1.39-1.29 (m, 4 H), 1.30 (d, *J* = 7.0 Hz, 3 H), 0.89 (t, *J* = 7.0 Hz, 3 H); **<sup>13</sup>C NMR** (CDCl<sub>3</sub>, 100 MHz)  $\delta$  (ppm): 171.0, 80.8, 43.7, 36.5, 31.3, 30.7, 29.5, 28.2, 22.4, 21.5, 14.1; **HRMS** (ESI+) mass calculated for [M+Na]<sup>+</sup> (C<sub>13</sub>H<sub>26</sub>O<sub>2</sub>NaS) requires *m/z* 269.1546, found *m/z* 269.1546; **IR** (film)  $\nu_{\max}/\text{cm}^{-1}$ : 2929, 1727, 1368, 1149, 907, 731, 648.

### *tert*-Butyl (*S*)-3-(isopropylthio)butanoate **4g**

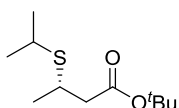

To a solution of *tert*-butyl crotonate **2e** (32  $\mu$ L, 0.20 mmol, 1.0 eq) and **1g** (0.020 mmol, 0.10 eq) in Et<sub>2</sub>O (0.40 mL) at 0 °C was added 2-propanethiol **3c** (56  $\mu$ L, 0.60 mmol, 3.0 eq) according General Procedure **E**. The reaction mixture was purified by FCC (petroleum ether: Et<sub>2</sub>O 99:1) to afford **4g** as a colourless oil in 86% yield (37.5 mg) and 96:4 er [determined by GC, Supelco  $\beta$ -dex<sup>TM</sup> 325, 30 m, 0.25 mm, 0.25  $\mu$ m, carrier gas He (flow rate 30 cm/s); column temperature 80 °C ramp 1 °C/min to 90 °C then 90 °C, t (minor) = 60.86 min, t (major) = 61.78 min].

$[\alpha]_D^{23} = +1.6$  (*c* 0.8, CHCl<sub>3</sub>); **<sup>1</sup>H NMR** (CDCl<sub>3</sub>, 400 MHz)  $\delta$  (ppm): 3.28 - 3.13 (m, 1 H), 2.99 (spt, *J* = 7.0 Hz, 1 H), 2.51 (dd, *J* = 15.0, 6.0 Hz, 1 H), 2.33 (dd, *J* = 15.0, 8.5 Hz, 1 H), 1.45 (s, 9 H), 1.30 (d, *J* = 7.0 Hz, 3 H), 1.26 (t, *J* = 7.0 Hz, 6 H); **<sup>13</sup>C NMR** (CDCl<sub>3</sub>, 100 MHz)  $\delta$  (ppm): 171.1, 80.8, 43.9, 35.4, 34.2, 28.2, 23.9, 23.7, 21.9; **HRMS** (ESI+) mass calculated for [M+Na]<sup>+</sup> (C<sub>11</sub>H<sub>22</sub>O<sub>2</sub>NaS) requires *m/z* 241.1233, found *m/z* 241.1229; **IR** (film)  $\nu_{\max}/\text{cm}^{-1}$ : 2972, 1727, 1368, 1149, 909, 731, 648.

### ***tert*-Butyl (S)-3-(isopentylthio)butanoate 4h**

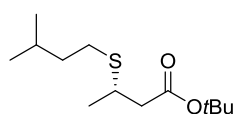

To a solution of *tert*-butyl crotonate **2e** (32  $\mu$ L, 0.20 mmol, 1.0 eq) and **1g** (0.020 mmol, 0.10 eq) in Et<sub>2</sub>O (0.40 mL) at 0 °C was added 3-methyl-1-butanethiol **3d** (74  $\mu$ L, 0.60 mmol, 3.0 eq) according General Procedure **E**. The reaction mixture was purified by FCC (petroleum ether: Et<sub>2</sub>O 99:1) to afford **4h** as a yellow oil in 98% yield (48 mg) and 95:5 er [determined by HPLC, chiralpak IA, hexane/isopropanol 100:0,  $\lambda$  210 nm, 1.0 mL/min, t (major) = 10.55 min, t (minor) = 12.42 min].

$[\alpha]_D^{23} = -4.9$  (*c* 1.5, CHCl<sub>3</sub>); **<sup>1</sup>H NMR** (CDCl<sub>3</sub>, 400 MHz)  $\delta$  (ppm): 3.19 - 3.10 (m, 1 H), 2.56 - 2.50 (m, 3 H), 2.33 (dd, *J* = 15.0, 8.5 Hz, 1 H), 1.72 - 1.59 (m, 1 H), 1.49 - 1.43 (m, 2 H), 1.45 (s, 9 H), 1.30 (d, *J* = 7.0 Hz, 3 H), 0.89 (d, *J* = 7.0 Hz, 6 H); **<sup>13</sup>C NMR** (CDCl<sub>3</sub>, 100 MHz)  $\delta$  (ppm): 171.0, 80.8, 43.7, 38.8, 36.5, 28.7, 28.2, 27.6, 22.4, 22.4, 21.4; **HRMS** (ESI+) mass calculated for [M+Na]<sup>+</sup> (C<sub>13</sub>H<sub>26</sub>O<sub>2</sub>NaS) requires *m/z* 269.1546, found *m/z* 269.1541; **IR** (film)  $\nu_{\max}/\text{cm}^{-1}$ : 2959, 1729, 1368, 1149, 909, 733, 648.

### ***tert*-Butyl (S)-3-(decylthio)butanoate 4i**

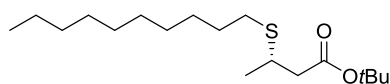

To a solution of *tert*-butyl crotonate **2e** (32  $\mu$ L, 0.20 mmol, 1.0 eq) and **1g** (0.020 mmol, 0.10 eq) in Et<sub>2</sub>O (0.40 mL) at 0 °C was added decane-1-thiol **3e** (124  $\mu$ L, 0.60 mmol, 3.0 eq) according General Procedure **E**. The reaction mixture was purified by FCC (petroleum ether: Et<sub>2</sub>O 99:1) to afford **4i** as a colourless oil in 97% yield (61 mg) and 95:5 er [determined by GC, Supelco  $\beta$ -dex<sup>TM</sup> 325, 30 m, 0.25 mm, 0.25  $\mu$ m, carrier gas He (flow rate 30 cm/s); column temperature 90 °C ramp 1 °C/min to 100 °C then 100 °C, t (minor) = 195.88 min, t (minor) = 197.92 min].

$[\alpha]_D^{23} = +3.5$  (*c* 1.2, CHCl<sub>3</sub>); **<sup>1</sup>H NMR** (CDCl<sub>3</sub>, 400 MHz)  $\delta$  (ppm): 3.19 - 3.10 (m, 1 H), 2.56 - 2.50 (m, 3 H), 2.33 (dd, *J* = 15.0, 8.5 Hz, 1 H), 1.62 - 1.53 (m, 2 H), 1.45 (s, 9 H), 1.38 - 1.25 (m, 17 H), 0.87 (d, *J* = 7.0 Hz, 3 H); **<sup>13</sup>C NMR** (CDCl<sub>3</sub>, 100 MHz)  $\delta$  (ppm): 171.0, 80.8, 43.7, 36.5, 32.0, 30.7, 29.9, 29.7, 29.5, 29.4, 29.2, 28.7, 28.2, 22.8, 21.5, 14.3; **HRMS** (ESI+) mass calculated for [M+Na]<sup>+</sup> (C<sub>18</sub>H<sub>36</sub>O<sub>2</sub>NaS) requires *m/z* 339.2328, found *m/z* 339.2320; **IR** (film)  $\nu_{\max}/\text{cm}^{-1}$ : 2925, 2855, 1730, 1457, 1367, 1148, 908, 733, 648.

### *tert*-Butyl (*S*)-3-(cyclohexylthio)butanoate **4j**

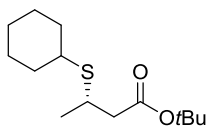

To a solution of *tert*-butyl crotonate **2e** (32  $\mu$ L, 0.20 mmol, 1.0 eq) and **1g** (0.020 mmol, 0.10 eq) in Et<sub>2</sub>O (0.40 mL) at 0 °C was added cyclohexanethiol (73  $\mu$ L, 0.60 mmol, 3.0 eq) **3f** according to a modified General Procedure **E** stirring for 96 h. The reaction mixture was purified by FCC (petroleum ether: Et<sub>2</sub>O 99:1) to afford **4j** as a colourless oil in 68% yield (34.8 mg) and 95:5 er [determined by HPLC, chiralpak IA, hexane/isopropanol 100:0,  $\lambda$  220 nm, 0.5 mL/min, t (major) = 27.64 min, t (minor) = 31.64 min].

$[\alpha]_D^{23} = +1.1$  (*c* 0.9, CHCl<sub>3</sub>); **<sup>1</sup>H NMR** (CDCl<sub>3</sub>, 400 MHz)  $\delta$  (ppm): 3.26 – 3.17 (m, 1 H), 2.75 – 2.65 (m, 1 H), 2.50 (dd, *J* = 15.0, 6.0 Hz, 1 H), 2.31 (dd, *J* = 15.0, 8.5 Hz, 1 H), 2.00 – 1.88 (m, 2 H), 1.80 – 1.70 (m, 2 H), 1.63 – 1.55 (m, 1 H), 1.44 (s, 9 H), 1.32 – 1.22 (m, 8 H); **<sup>13</sup>C NMR** (CDCl<sub>3</sub>, 100 MHz)  $\delta$  (ppm): 171.0, 80.7, 44.1, 42.8, 35.0, 34.2, 34.1, 28.2, 26.2, 25.9, 22.1; **HRMS** (ESI+) mass calculated for [M+Na]<sup>+</sup> (C<sub>14</sub>H<sub>26</sub>O<sub>2</sub>NaS) requires *m/z* 281.1546, found *m/z* 281.1533; **IR** (film)  $\nu_{\max}/\text{cm}^{-1}$ : 2928, 2853, 1728, 1367, 1145, 844, 732.

### *tert*-Butyl (*S*)-3-(cyclopentylthio)butanoate **4k**

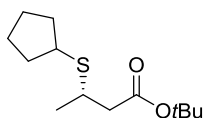

To a solution of *tert*-butyl crotonate **2e** (32  $\mu$ L, 0.20 mmol, 1.0 eq) and **1g** (0.020 mmol, 0.10 eq) in Et<sub>2</sub>O (0.40 mL) at 0 °C was added cyclopentanethiol **3g** (64  $\mu$ L, 0.60 mmol, 3.0 eq) according to General Procedure **E**. The reaction mixture was purified by FCC (petroleum ether: Et<sub>2</sub>O 99:1) to afford **4k** as a colourless oil in 99% yield (48.4 mg) and 96:4 er [determined by HPLC, chiralpak IA, hexane/isopropanol 100:0,  $\lambda$  220 nm, 1.0 mL/min, t (major) = 13.15 min, t (minor) = 16.11 min].

$[\alpha]_D^{23} = +5.3$  (*c* 1.1, CHCl<sub>3</sub>); **<sup>1</sup>H NMR** (CDCl<sub>3</sub>, 400 MHz)  $\delta$  (ppm): 3.22 – 3.09 (m, 2 H), 2.53 (dd, *J* = 15.0, 6.0 Hz, 1 H), 2.32 (dd, *J* = 15.0, 8.5 Hz, 1 H), 2.08 – 1.93 (m, 2 H), 1.78 – 1.68 (m, 2 H), 1.60 – 1.45 (m, 4 H), 1.44 (s, 9 H), 1.31 (d, *J* = 6.5 Hz, 3 H); **<sup>13</sup>C NMR** (CDCl<sub>3</sub>, 100 MHz)  $\delta$  (ppm): 171.1, 80.8, 43.9, 42.8, 36.6, 34.4, 34.2, 28.2, 24.9, 24.8, 21.8; **HRMS** (ESI+) mass calculated for [M+Na]<sup>+</sup> (C<sub>13</sub>H<sub>24</sub>O<sub>2</sub>NaS) requires *m/z* 267.1389, found *m/z* 267.1382; **IR** (film)  $\nu_{\max}/\text{cm}^{-1}$ : 2960, 1727, 1368, 1147, 907, 843, 730.

### ***tert*-Butyl (S)-3-(phenethylthio)butanoate **4l****

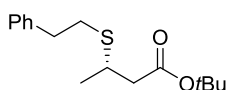

To a solution of *tert*-butyl crotonate **2e** (32  $\mu$ L, 0.20 mmol, 1.0 eq) and **1g** (0.020 mmol, 0.10 eq) in Et<sub>2</sub>O (0.40 mL) at 0 °C was added 2-phenylethanethiol **3h** (80  $\mu$ L, 0.60 mmol, 3.0 eq) according to General Procedure **E**. The reaction mixture was purified by FCC (petroleum ether: Et<sub>2</sub>O 99:1) to afford **4l** as a colourless oil in 96% yield (54 mg) and 94:6 er [determined by HPLC, chiralpak IA, hexane/isopropanol 100:0,  $\lambda$  210 nm, 1.0 mL/min, t (major) = 9.23 min, t (minor) = 10.49 min].

$[\alpha]_D^{23} = +5.6$  (*c* 1.3, CHCl<sub>3</sub>); <sup>1</sup>H NMR (CDCl<sub>3</sub>, 400 MHz)  $\delta$  (ppm): 7.33 – 7.27 (m, 2 H), 7.24 – 7.18 (m, 3 H), 3.26 – 3.16 (m, 1 H), 2.91 – 2.87 (m, 2 H), 2.83 – 2.79 (m, 2 H), 2.55 (dd, *J* = 15.0, 6.0 Hz, 1 H), 2.36 (dd, *J* = 15.0, 8.5 Hz, 1 H), 1.46 (s, 9 H), 1.33 (d, *J* = 6.5 Hz, 3 H); <sup>13</sup>C NMR (CDCl<sub>3</sub>, 100 MHz)  $\delta$  (ppm): 170.9, 140.7, 128.6 (2 C), 126.4, 80.8, 43.6, 36.7, 36.4, 32.2, 28.2, 21.4; HRMS (ESI+) mass calculated for [M+Na]<sup>+</sup> (C<sub>16</sub>H<sub>24</sub>O<sub>2</sub>NaS) requires *m/z* 303.1389, found *m/z* 303.1374. IR (film)  $\nu_{\max}/\text{cm}^{-1}$ : 2976, 1726, 1367, 1146, 843, 732, 697.

### ***tert*-Butyl (S)-3-((4-methoxybenzyl)thio)butanoate **4m****

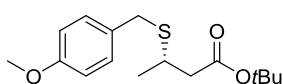

To a solution of *tert*-butyl crotonate **2e** (32  $\mu$ L, 0.20 mmol, 1.0 eq) and **1g** (0.020 mmol, 0.10 eq) in Et<sub>2</sub>O (0.40 mL) at -15 °C was added 4-methoxy- $\alpha$ -toluenethiol **3i** (84  $\mu$ L, 0.60 mmol, 3.0 eq) and the reaction mixture was stirred at -15 °C for 24 h according to a modified General Procedure **E**. The reaction mixture was purified by FCC (petroleum ether: Et<sub>2</sub>O 99:1) to afford **4m** as a colourless oil in >99% yield (58.8 mg) and 95:5 er [determined by HPLC, chiralpak AS-H, hexane/isopropanol 99:1,  $\lambda$  220 nm, 1.0 mL/min, t (major) = 8.27 min, t (minor) = 12.35 min].

$[\alpha]_D^{23} = -1.9$  (*c* 1.0, CHCl<sub>3</sub>); <sup>1</sup>H NMR (CDCl<sub>3</sub>, 400 MHz)  $\delta$  (ppm): 7.25 - 7.22 (m, 2 H), 6.86 – 6.82 (m, 2 H), 3.79 (s, 3 H), 3.72 (s, 2 H), 3.11 – 3.02 (m, 1 H), 2.53 (dd, *J* = 15.0, 6.0 Hz, 1 H), 2.33 (dd, *J* = 15.0, 8.5 Hz, 1 H), 1.44 (s, 9 H), 1.28 (d, *J* = 7.0 Hz, 3 H); <sup>13</sup>C NMR (CDCl<sub>3</sub>, 100 MHz)  $\delta$  (ppm): 170.8, 158.7, 130.3, 130.0, 114.0, 80.8, 55.4, 43.4, 36.1, 34.7, 28.2, 21.2; HRMS (ESI+) mass calculated for [M+Na]<sup>+</sup> (C<sub>16</sub>H<sub>24</sub>NaO<sub>3</sub>S) requires *m/z* 319.1338, found *m/z* 319.1329; IR (film)  $\nu_{\max}/\text{cm}^{-1}$ : 2976, 1725, 1511, 1247, 1147, 833, 730.



### ***tert*-Butyl (*R*)-3-((4-methoxybenzyl)thio)-3-phenylpropanoate **4n****

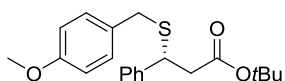

To a solution of *tert*-butylcinnamate **2f** (40.0 mg, 0.20 mmol, 1.0 eq) and **1g** (0.020 mmol, 0.10 eq) in Et<sub>2</sub>O (0.40 mL) at 0 °C was added 4-methoxy- $\alpha$ -toluenethiol **3i** (84  $\mu$ L, 0.60 mmol, 3.0 eq) according to a modified General Procedure **E** stirring for 72 h at 0 °C. The reaction mixture was purified by FCC (petroleum ether: Et<sub>2</sub>O 99:1) to afford **4n** as a colourless oil in 98% yield (70.0 mg) and 88:12 er [determined by HPLC, chiralpak IA, hexane/isopropanol 100:0,  $\lambda$  = 240 nm, 0.5 mL/min, t (minor) = 12.18 min, t (minor) = 13.15 min].

$[\alpha]_D^{23} = +89.0$  (*c* 1.0, CHCl<sub>3</sub>); **<sup>1</sup>H NMR** (CDCl<sub>3</sub>, 400 MHz)  $\delta$  (ppm): 7.30 - 7.26 (m, 4 H), 7.24 - 7.19 (m, 1 H), 7.12 - 7.08 (m, 2 H), 6.80 - 6.75 (m, 2 H), 4.07 (dd, *J* = 8.5 Hz, 7.0 Hz, 1 H), 3.75 (s, 3 H), 3.48 (d, *J* = 13.5 Hz, 1 H), 3.39 (d, *J* = 13.5 Hz, 1 H), 2.74 (dd, *J* = 15.0, 7.5 Hz, 1 H), 2.69 (dd, *J* = 15.0, 8.5 Hz, 1 H), 1.25 (s, 9 H); **<sup>13</sup>C NMR** (CDCl<sub>3</sub>, 100 MHz)  $\delta$  (ppm): 169.9, 158.7, 141.3, 130.1, 129.9, 128.5, 128.1, 127.5, 114.0, 80.9, 55.4, 45.3, 42.7, 35.1, 28.0; **HRMS** (ESI+) mass calculated for [M+Na]<sup>+</sup> (C<sub>21</sub>H<sub>26</sub>O<sub>3</sub>NaS) requires *m/z* 381.1495, found *m/z* 381.1495. **IR** (film)  $\nu_{\max}/\text{cm}^{-1}$ : 2977, 1729, 1511, 1367, 1249, 1174, 1140, 832, 750, 700.

### ***tert*-Butyl (*S*)-3-(propylthio)pentanoate **4o****

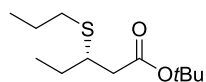

To a solution of *tert*-butyl (*E*)-pent-2-enoate **2g** (31 mg, 0.20 mmol, 1.00 eq) and **1g** (0.020 mmol, 0.10 eq) in Et<sub>2</sub>O (0.40 mL) at 0 °C was added 1-propanethiol **3a** (56  $\mu$ L, 0.60 mmol, 3.0 eq) according to a modified General Procedure **E** stirring for 72 h at 0 °C. The reaction mixture was purified by FCC (petroleum ether: Et<sub>2</sub>O 99:1) to afford **4o** as a colourless oil in 84% yield (39 mg) and 93:7 er [determined by HPLC, chiralpak IA, hexane/isopropanol 100:0,  $\lambda$  = 220 nm, 1.0 mL/min, t (major) = 8.37 min, t (minor) = 9.86 min].

$[\alpha]_D^{23} = -1.2$  (*c* 1.24, CHCl<sub>3</sub>); **<sup>1</sup>H NMR** (CDCl<sub>3</sub>, 400 MHz)  $\delta$  (ppm): 2.99 - 2.92 (m, 1 H), 2.52 - 2.46 (m, 4 H), 1.68 - 1.55 (m, 4 H), 1.00 (t, *J* = 7.5 Hz, 3 H), 0.98 (t, *J* = 7.5 Hz, 3 H); **<sup>13</sup>C NMR** (CDCl<sub>3</sub>, 100 MHz)  $\delta$  (ppm): 171.3, 80.8, 43.7, 42.0, 32.9, 28.2, 28.1, 23.3, 13.7, 11.4; **HRMS** (ESI+) mass calculated for [M+Na]<sup>+</sup> (C<sub>12</sub>H<sub>24</sub>O<sub>2</sub>NaS) requires *m/z* 255.1389, found *m/z* 255.1384. **IR** (film)  $\nu_{\max}/\text{cm}^{-1}$ : 2965, 2931, 1729, 1368, 1148, 909, 733.

### ***tert*-Butyl (*S*)-3-(propylthio)decanoate **4p****

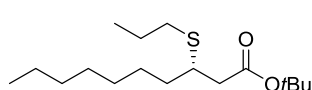

To a solution of *tert*-butyl (*E*)-dec-2-enoate **2h** (45.2mg, 0.20 mmol, 1.00 eq) and **1g** (0.020 mmol, 0.10 eq) in Et<sub>2</sub>O (0.40 mL) at 0 °C was added 1-propanethiol **3a** (56 μL, 0.60 mmol, 3.0 eq) according to a modified General Procedure **E** stirring for 72 h at 0 °C. The product was purified by FCC (99:1 petrol: Et<sub>2</sub>O) to afford **4p** as a colourless oil in 89% yield (54.0 mg) and 92:8 er [determined by HPLC, chiralpak IA, hexane/isopropanol 100:0, λ = 240 nm, 1.0 mL/min, t (major) = 15.44 min, t (minor) = 16.75 min].

[α]<sub>D</sub><sup>23</sup> = -2.1 (*c* 1.0, CHCl<sub>3</sub>); <sup>1</sup>H NMR (CDCl<sub>3</sub>, 400 MHz) δ (ppm): 3.01 - 2.95 (m, 1 H), 2.52 - 2.43 (m, 4 H), 1.64 - 1.52 (m, 5 H), 1.45 (s, 9 H), 1.32 - 1.21 (m, 9 H), 0.97 (t, *J* = 7.5 Hz, 3 H), 0.87 (t, *J* = 7.0 Hz, 3 H); <sup>13</sup>C NMR (CDCl<sub>3</sub>, 100 MHz) δ (ppm): 171.3, 80.7, 42.4, 42.0, 35.2, 32.8, 31.9, 29.6, 29.3, 28.2, 26.9, 23.3, 22.8, 14.2, 13.7; HRMS (ESI+) mass calculated for [M+Na]<sup>+</sup> (C<sub>17</sub>H<sub>34</sub>O<sub>2</sub>NaS) requires *m/z* 325.2172, found *m/z* 325.2172; IR (film) ν<sub>max</sub>/cm<sup>-1</sup>: 2928, 2857, 1729, 1368, 1147, 757.

### ***tert*-Butyl (*S*)-3-(propylthio)hept-6-enoate **4q****

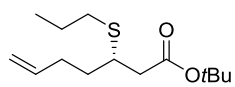

To a solution of *tert*-butyl (*E*)-hepta-2,6-dienoate **2i** (36.4 mg, 0.20 mmol, 1.0 eq) and **1g** (0.020 mmol, 0.10 eq) in Et<sub>2</sub>O (0.40 mL) at 0 °C was added 1-propanethiol **3a** (56 μL, 0.60 mmol, 3.0 eq) according to a modified General Procedure **E** stirring for 48 h at 0 °C. The product was purified by FCC (99:1 petrol: Et<sub>2</sub>O) to afford **4q** as a colourless oil in 84% yield (43.0 mg) and 94:6 er [chiralpak IA, hexane/isopropanol 100:0, λ = 230 nm, 1.0 mL/min, t (major) = 9.73 min, t (minor) = 11.36 min].

[α]<sub>D</sub><sup>23</sup> = -6.4 (*c* 0.9, CHCl<sub>3</sub>); <sup>1</sup>H NMR (CDCl<sub>3</sub>, 400 MHz) δ (ppm): 5.78 (ddt, *J* = 17.0, 10.0, 6.5 Hz, 1 H), 5.03 ('dq', *J* = 17.0, 1.5 Hz, 1 H), 4.96 ('dq', *J* = 10.0, 1.5 Hz, 1 H), 2.99 ('qd', *J* = 7.5, 5.5 Hz, 1 H), 2.54 - 2.41 (m, 4 H), 2.29 - 2.12 (m, 2 H), 1.71 - 1.52 (m, 4 H), 1.44 (s, 9 H), 0.97 (t, *J* = 7.5 Hz, 3 H); <sup>13</sup>C NMR (CDCl<sub>3</sub>, 100 MHz) δ (ppm): 171.1, 138.1, 115.2, 80.8, 42.5, 41.5, 34.3, 32.8, 31.1, 28.2, 23.2, 13.7; HRMS (ESI+) mass calculated for [M+Na]<sup>+</sup> (C<sub>14</sub>H<sub>26</sub>O<sub>2</sub>NaS) requires *m/z* 281.1546, found *m/z* 281.1533; IR (film) ν<sub>max</sub>/cm<sup>-1</sup>: 2967, 2931, 1727, 1367, 1250, 1144, 909, 731.

### ***tert*-Butyl (*S*)-5-phenyl-3-(propylthio)pentanoate **4r****

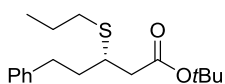

To a solution of *tert*-butyl (*E*)-5-phenylpent-2-enoate **2j** (46.4 mg, 0.20 mmol, 1.0 eq) and **1g** (0.020 mmol, 0.10 eq) in Et<sub>2</sub>O (0.40 mL) at 0 °C was added 1-propanethiol **3a** (56 μL, 0.60 mmol, 3.0 eq) according to a modified General Procedure **E** stirring for 72 h at 0 °C. The product was purified by FCC (99:1 petrol: Et<sub>2</sub>O) to afford **4r** as a colourless oil in 88% yield (54.0 mg) and 94:6 er [chiralpak IA, hexane/isopropanol 100:0, λ = 210 nm, 1.0 mL/min, t (major) = 17.39 min, t (minor) = 20.08 min].

[α]<sub>D</sub><sup>23</sup> = -6.6 (c 1.14, CHCl<sub>3</sub>); <sup>1</sup>H NMR (CDCl<sub>3</sub>, 400 MHz) δ (ppm): 7.31 – 7.26 (m, 2 H), 7.22 – 7.17 (m, 3 H), 3.03 ('qd', J = 7.5, 5.0 Hz, 1 H), 2.88 – 2.71 (m, 2 H), 2.59 – 2.45 (m, 4 H), 1.97 – 1.79 (m, 2 H), 1.66 – 1.56 (m, 2 H), 1.45 (s, 9 H), 1.00 (t, J = 7.5 Hz, 3 H); <sup>13</sup>C NMR (CDCl<sub>3</sub>, 100 MHz) δ (ppm): 171.0, 141.9, 128.6, 128.5, 126.0, 80.8, 42.5, 41.6, 36.8, 33.1, 32.7, 28.2, 23.2, 13.7; HRMS (ESI+) mass calculated for [M+Na]<sup>+</sup> (C<sub>18</sub>H<sub>28</sub>O<sub>2</sub>NaS) requires m/z 331.1702, found m/z 331.1702. IR (film) ν<sub>max</sub>/cm<sup>-1</sup>: 2964, 1726, 1454, 1367, 1249, 1141, 847, 748, 693.

### ***tert*-Butyl (*S*)-5-((*tert*-butoxycarbonyl)amino)-3-(propylthio)pentanoate **4s****

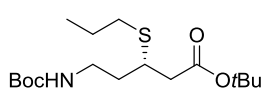

To a solution of *tert*-butyl (*E*)-5-((*tert*-butoxycarbonyl)amino)pent-2-enoate **2k** (54.2 mg, 0.20 mmol, 1.00 eq) at 0 °C was added 1-propanethiol **3a** (56 μL, 0.60 mmol, 3.0 eq) according to a modified General Procedure **E** stirring for 72 h at 0 °C. The product was purified by FCC (99:1 petrol: Et<sub>2</sub>O) to afford **4s** as a colourless oil in 81% yield (56.0 mg) and 94:6 er [determined by HPLC, chiralpak AD-H, hexane/isopropanol 99:1, λ = 210 nm, 1.0 mL/min, t (minor) = 17.56 min, t (major) = 18.79 min].

[α]<sub>D</sub><sup>23</sup> = - 7.3 (c 0.8, CHCl<sub>3</sub>); <sup>1</sup>H NMR (CDCl<sub>3</sub>, 400 MHz) δ (ppm): 4.77 (br s, 1 H), 3.33 – 3.18 (m, 2 H), 3.04 – 2.96 (m, 1H), 2.55 - 2.42 (m, 4 H), 1.85 - 1.62 (m, 2 H), 1.61 - 1.53 (m, 2 H), 1.44 (s, 9 H), 1.42 (s, 9 H), 0.96 (t, J = 7.5 Hz, 3 H); <sup>13</sup>C NMR (CDCl<sub>3</sub>, 100 MHz) δ (ppm): 171.0, 156.0, 81.0, 79.3, 42.4, 39.5, 38.5, 34.9, 32.6, 28.5, 28.2, 23.2, 13.7; HRMS (ESI+) mass calculated for [M+Na]<sup>+</sup> (C<sub>17</sub>H<sub>33</sub>NNaO<sub>4</sub>NaS) requires m/z 370.2023, found m/z 370.2019; IR (film) ν<sub>max</sub>/cm<sup>-1</sup>: 3470, 2979, 2932, 1713, 1504, 1366, 1249, 1144, 736.

### ***tert*-Butyl (*S*)-5-((*tert*-butyldimethylsilyl)oxy)-3-(propylthio)pentanoate **4t****

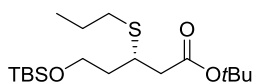

To a solution of *tert*-butyl (*E*)-5-((*tert*-butyldimethylsilyl)oxy)pent-2-enoate **2l** (57.2 mg, 0.20 mmol, 1.0 eq) at 0 °C was added 1-propanethiol **3a** (56 μL, 0.60 mmol, 3.0 eq) according to a modified General Procedure **E** stirring for 72 h at 0 °C. The product was purified by FCC (99:1 petrol: Et<sub>2</sub>O) to afford **4t** as a colourless oil in 97% yield (70.0 mg) and 94:6 er [determined by HPLC, chiralpak IA, hexane/isopropanol 100:0, λ = 230 nm, 1.0 mL/min, t (major) = 15.25 min, t (minor) = 17.40 min].

[α]<sub>D</sub><sup>23</sup> = -6.8 (c 1.2, CHCl<sub>3</sub>); <sup>1</sup>H NMR (CDCl<sub>3</sub>, 400 MHz) δ (ppm): 3.81 - 3.68 (m, 2 H), 3.20 - 3.08 (m, 1 H), 2.54 - 2.45 (m, 4 H), 1.84 - 1.66 (m, 2 H), 1.59 (sxt, *J* = 7.5 Hz, 2 H), 1.45 (s, 9 H), 0.97 (t, *J* = 7.5 Hz, 3 H), 0.88 (s, 9 H), 0.04 (s, 6 H); <sup>13</sup>C NMR (CDCl<sub>3</sub>, 100 MHz) δ (ppm): 171.0, 80.7, 60.5, 42.7, 38.8, 38.2, 32.9, 28.2, 26.1, 23.3, 18.4, 13.7, -5.2, -5.2; HRMS (ESI+) mass calculated for [M+H]<sup>+</sup> (C<sub>18</sub>H<sub>39</sub>O<sub>3</sub>SSi) requires *m/z* 363.2384, found *m/z* 363.2376. IR (film) ν<sub>max</sub>/cm<sup>-1</sup>: 2958, 2930, 2858, 1731, 1472, 1367, 1255, 1147, 1100, 836, 776, 735.

### **1.6 Preparative scale SMA reaction with 1 mol% catalyst**

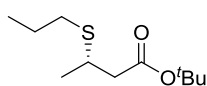

To a solution of *tert*-butyl crotonate **2e** (1.12 mL, 7.0 mmol, 1.0 eq) and **1g** (0.070 mmol, 0.010 eq) in Et<sub>2</sub>O (1.4 mL) at 0 °C was added 1-propanethiol **3a** (1.89 mL, 21.0 mmol, 3.0 eq) and stirring was maintained for 24 h whereupon the reaction mixture was quenched by the addition of 1.0 M AcOH (in CH<sub>2</sub>Cl<sub>2</sub>, 0.7 mL). The volatiles were removed under a stream of nitrogen and the crude reaction mixture was purified by FCC (99:1 petrol: Et<sub>2</sub>O) to afford **4e** as a colourless oil in 97% yield (1.48 g) and 94:6 er [determined by HPLC, chiralpak IA, hexane/isopropanol 100:0, λ 210 nm, 1.0 mL/min, t (major) = 9.36 min, t (minor) = 10.58 min]. Spectroscopic data consistent with that reported in section 1.5.

## 1.7 Derivatisation of $\beta$ -Mercaptoester products

### *tert*-Butyl (*S*)-3-(propylsulfonyl)butanoate **5a**

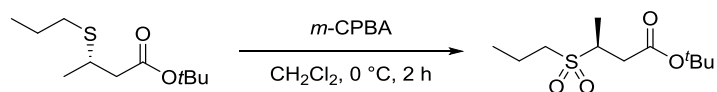

To a solution of 3-chloroperbenzoic acid (86 mg, 0.5 mmol, 2.5 eq) in dichloromethane (5 mL) was added *tert*-butyl (*S*)-3-(propylthio)butanoate **4e** (43.6 mg, 0.2 mmol, 1.0 eq, 94:6 er) in dichloromethane (1 mL) at 0 °C. The reaction was stirred at 0 °C for 2 h, and then quenched with NaHCO<sub>3</sub> (2 mL). The mixture was extracted with Et<sub>2</sub>O (3 x 5 mL) and the organic layers combined, dried (Na<sub>2</sub>SO<sub>4</sub>), filtered and concentrated *in vacuo*. The crude reaction mixture was purified by FCC to afford the title compound **5a** as a colourless oil in 96% yield (48 mg) and 94:6 er [determined by HPLC, chiralpak IA, hexane/isopropanol 95:5,  $\lambda = 220$  nm, 1.0 mL/min, *t* (major) = 10.93 min, *t* (major) = 14.85 min].

$[\alpha]_D^{23} = +4.6$  (*c* 1.1, CHCl<sub>3</sub>); <sup>1</sup>H NMR (CDCl<sub>3</sub>, 400 MHz)  $\delta$  (ppm): 3.50 - 3.41 (m, 1 H), 2.97 (dd, *J* = 16.5, 4.5 Hz, 1 H), 2.92 (t, *J* = 8 Hz, 2 H), 2.39 (dd, *J* = 16.5, 9.5 Hz, 1 H), 1.96 - 1.88 (m, 2 H), 1.46 (s, 9 H), 1.41 (d, *J* = 7.0 Hz, 3 H), 1.08 (t, *J* = 7.5 Hz, 3 H); <sup>13</sup>C NMR (CDCl<sub>3</sub>, 100 MHz)  $\delta$  (ppm): 169.6, 82.0, 54.1, 52.0, 35.3, 28.2, 15.2, 14.0, 13.4; HRMS (ESI+) mass calculated for [M+Na]<sup>+</sup> (C<sub>11</sub>H<sub>22</sub>O<sub>4</sub>NaS) requires *m/z* 273.1131, found *m/z* 273.1132; IR (film)  $\nu_{\max}/\text{cm}^{-1}$ : 2980, 2360, 1729, 1155, 754.

### Methyl (*S*)-3-(propylthio)butanoate **4a**

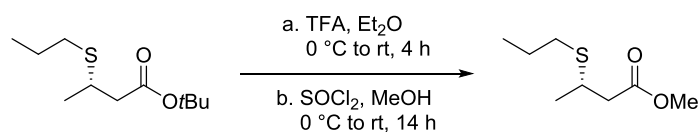

To a solution of *tert*-butyl (*S*)-3-(propylthio)butanoate **4e** (43.6 mg, 0.20 mmol, 1.00 eq, 96:4 er) in 1.0 mL Et<sub>2</sub>O was added trifluoroacetic acid (0.1 mL) at 0 °C dropwise. The reaction mixture was warmed to rt and stirred for 4 h, and the volatiles removed by N<sub>2</sub> stream. Saturated aq NaHCO<sub>3</sub> (5 mL) was added into the mixture and the organic phase was extracted using Et<sub>2</sub>O (2 x 5 mL), washed with brine (5 mL), dried (NaSO<sub>4</sub>), filtered, and concentrated *in vacuo* to afford the crude mixture, which was used in the next step without purification. The carboxylic acid intermediate was dissolved in MeOH (5 mL). To the

solution was added SOCl<sub>2</sub> (0.12 mL, 0.44 mmol, 2.2 eq) at 0 °C. The reaction was warmed to room temperature and stirred overnight. The reaction mixture was then quenched with saturated aq NaHCO<sub>3</sub> and then extracted with CH<sub>2</sub>Cl<sub>2</sub> (3 x 5 mL). The organic phase was combined, dried (Na<sub>2</sub>SO<sub>4</sub>), filtered and concentrated *in vacuo*. The crude reaction mixture was purified by FCC (99:1 petrol: Et<sub>2</sub>O) to afford the title compound **5b** as a colourless oil in 78% yield (27 mg) and 94:6 er [determined by HPLC, chiralpak IA, hexane/isopropanol 100:0, λ = 220 nm, 1.0 mL/min, t (major) = 19.96 min, t (minor) = 23.58 min]; [α]<sub>D</sub><sup>25</sup> = + 9.8 (c 0.9, CHCl<sub>3</sub>). Other data consistent with that reported in section 1.5.

**(S)-3-((4-Methoxybenzyl)thio)butan-1-ol 5b**

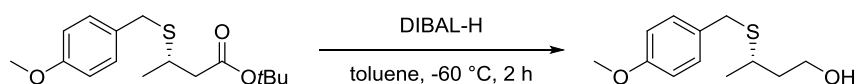

To a solution of *tert*-butyl (*S*)-3-((4-methoxybenzyl)thio)butanoate **4m** (28 mg, 0.095 mmol, 1.0 eq, 95:5 er) in toluene (1 mL) at -60 °C was added DIBAL-H (1 M in toluene, 0.2 mL, 0.20 mmol, 2.2 eq) dropwise. The reaction was stirred at -60 °C for 2 hours and then quenched with saturated NH<sub>4</sub>Cl (aq), extracted three times with CH<sub>2</sub>Cl<sub>2</sub> (3 x 5 mL). The combined organics were dried (Na<sub>2</sub>SO<sub>4</sub>), filtered and concentrated *in vacuo*. The crude mixture was purified by FCC to afford the title compound **5c** as a colourless oil 93% yield (20 mg) and 93:7 er [determined by HPLC, chiralpak AD-H, hexane/isopropanol 97:3, λ = 220 nm, 1.0 mL/min, t (minor) = 37.72 min, t (major) = 39.48 min].

[α]<sub>D</sub><sup>23</sup> = - 0.2 (c 1.0, CHCl<sub>3</sub>); <sup>1</sup>H NMR (CDCl<sub>3</sub>, 400 MHz) δ (ppm): 7.28 (d, *J* = 8.5 Hz, 2 H), 6.87 (d, *J* = 8.5 Hz, 2 H), 3.82 (s, 3 H), 3.78 – 3.66 (m, 4 H), 2.84 (sxt, *J* = 6.5 Hz, 1 H), 2.16 (s, 1 H), 1.79 (q, *J* = 6.5 Hz, 2 H), 1.34 (d, *J* = 6.5 Hz, 3 H); <sup>13</sup>C NMR (CDCl<sub>3</sub>, 100 MHz) δ (ppm): 158.6, 130.4, 129.9, 113.9, 60.6, 55.3, 39.0, 36.7, 34.3, 21.7; HRMS (ESI+) mass calculated for [M+Na]<sup>+</sup> (C<sub>12</sub>H<sub>18</sub>O<sub>2</sub>NaS) requires *m/z* 249.0920, found *m/z* 249.0921. IR (film) ν<sub>max</sub>/cm<sup>-1</sup>: 3390, 2957, 1510, 1236, 1032, 831, 734.

## 1.8 Determination of Absolute Stereochemistry

### 1,1,1,3,3,3-Hexafluoropropan-2-yl (*R*)-3-((4-methoxybenzyl)thio)-3-phenylpropanoate

12

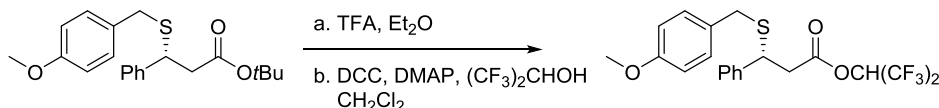

To a solution of *tert*-butyl (*R*)-3-((4-methoxybenzyl)thio)-3-phenylpropanoate **4n** (68.0 mg, 0.19 mmol, 1.00 eq, 88:12 er) in 1.0 mL Et<sub>2</sub>O was added trifluoroacetic acid (0.1 mL) at 0 °C dropwise. The reaction mixture was warmed to rt and stirred for 4 h, and the volatiles removed under a N<sub>2</sub> stream to afford the crude mixture, which was used in the next step without purification. The carboxylic acid intermediate was dissolved in dichloromethane (5 mL). To the solution was added 4-dimethylaminopyridine (5 mg, 0.04 mmol) and *N,N*-dicyclohexylcarbodiimide (49 mg, 0.24 mmol) and 1,1,1,3,3,3-hexafluoro-2-propanol (0.025 mL, 0.24 mmol) at 0 °C. The reaction was warmed to room temperature and stirred overnight. The reaction mixture was filtered and extracted three times with dichloromethane (5 mL). The organic phase was combined, dried (Na<sub>2</sub>SO<sub>4</sub>), filtered and concentrated *in vacuo*. The crude mixture was purified by FCC (99:1 petrol: Et<sub>2</sub>O) to afford **12** as a colourless oil in 82% yield (70.0 mg) and 90:10 er [determined by HPLC, chiralpak AS-H, hexane/isopropanol 99:1, λ = 230 nm, 1.0 mL/min, t (major) = 6.68 min, t (minor) = 11.64 min; the order of elution of the two enantiomers is consistent to that given in the literature].<sup>13</sup>

[α]<sub>D</sub><sup>23</sup> = +102.2 (*c* 0.85, CHCl<sub>3</sub>), [lit.<sup>13</sup> [α]<sub>D</sub><sup>25</sup> -65.9 (*c* 0.41, CHCl<sub>3</sub>) for (*S*)-**12**]. From the optical rotation and the HPLC chromatograms, the absolute configuration of **12** was determined to be (*R*).<sup>13</sup>

<sup>1</sup>H NMR (CDCl<sub>3</sub>, 400 MHz) δ (ppm): 7.30 - 7.16 (m, 5 H), 7.05 (d, *J* = 8.5 Hz, 2 H), 6.75 (d, *J* = 8.5 Hz, 2 H), 5.57 (spt, *J*<sub>HF</sub> = 6.1 Hz, 1 H), 4.06 (t, *J* = 8.0 Hz, 1 H), 3.72 (s, 3 H), 3.47 (d, *J* = 13.5 Hz, 1 H), 3.38 (d, *J* = 13.5 Hz, 1 H), 2.96 (d, *J* = 7.5 Hz, 2 H); <sup>13</sup>C NMR (CDCl<sub>3</sub>, 100 MHz) δ (ppm): 167.5, 158.9, 140.0, 130.1, 129.3, 128.9, 128.0, 127.8, 121.6 (q, *J*<sub>FC</sub> = 280.0 Hz), 114.1, 66.6 (spt, *J*<sub>FC</sub> = 34.6 Hz), 55.4, 44.4, 40.5, 35.3; <sup>19</sup>F NMR (CDCl<sub>3</sub>, 377 MHz) δ (ppm): -73.3. Data consistent with that reported in literature.<sup>13</sup>

## 2 References

- (1) Núñez, M. G.; Farley, A. J. M.; Dixon, D. J. *J. Am. Chem. Soc.* **2013**, *135*, 16348-16351.
- (2) Farley, A. J. M.; Sandford, C.; Dixon, D. J. *J. Am. Chem. Soc.* **2015**, *137*, 15992-15995.
- (3) Raheem, I. T.; Jacobsen, E. N. *Adv. Synth. Cat.* **2005**, *347*, 1701-1708.
- (4) Wu, Y.; Zhao, J.; Chen, J.; Pan, C.; Li, L.; Zhang, H. *Org. Lett.* **2009**, *11*, 597-600.
- (5) Denmark, S. E.; Beutner, G. L. *J. Am. Chem. Soc.* **2003**, *125*, 7800-7801.
- (6) Davies, S. G.; Lee, J. A.; Roberts, P. M.; Stonehouse, J. P.; Thomson, J. E. *J. Org. Chem.* **2012**, *77*, 7028-7045.
- (7) Davies, S. G.; Fletcher, A. M.; Roberts, P. M.; Smith, A. D. *Tetrahedron* **2009**, *65*, 10192 - 10213.
- (8) Claridge, T. D. W.; Davies, S. G.; Lee, J. A.; Nicholson, R. L.; Roberts, P. M.; Russell, A. J.; Smith, A. D.; Toms, S. M. *Org. Lett.* **2008**, *10*, 5437-5440.
- (9) Kitajima, M.; Murakami, Y.; Takahashi, N.; Wu, Y.; Kogure, N.; Zhang, R.-P.; Takayama, H. *Org. Lett.* **2014**, *16*, 5000-5003.
- (10) van der Westhuyzen, R.; Strauss, E. *J. Am. Chem. Soc.* **2010**, *132*, 12853-12855.
- (11) Li, X.; Lantrip, D.; Fuchs, P. L. *J. Am. Chem. Soc.* **2003**, *125*, 14262 - 14263.
- (12) Hawkins, J. M.; Lewis, T. A. *J. Org. Chem.* **1992**, *57*, 2114-2121.
- (13) Fang, X.; Li, J.; Wang, C.-J. *Org. Lett.* **2013**, *15*, 3448-3451.





$^1\text{H}$  NMR of **10** (400 MHz, MeOD- $d_4$ )

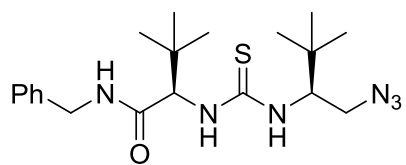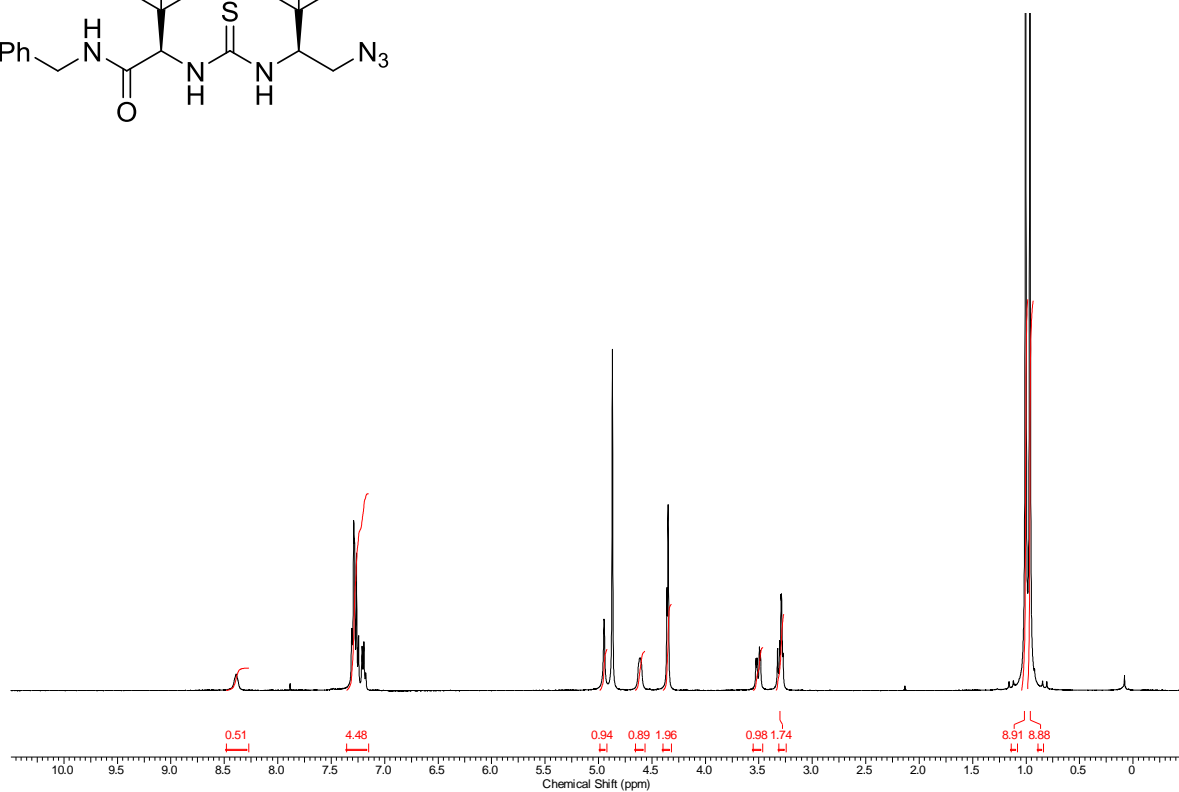

$^{13}\text{C}$  NMR of **10** (100 MHz, MeOD- $d_4$ )

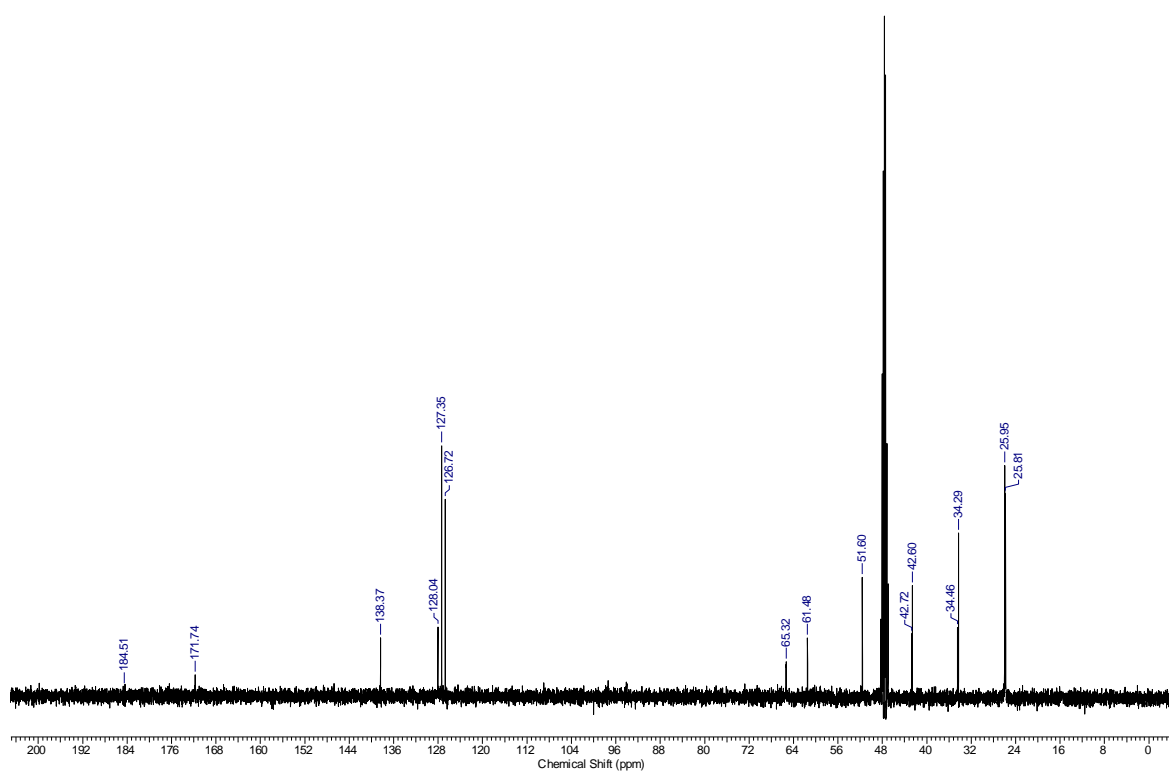

$^1\text{H}$  NMR of **11** (400 MHz, MeOD- $d_4$ )

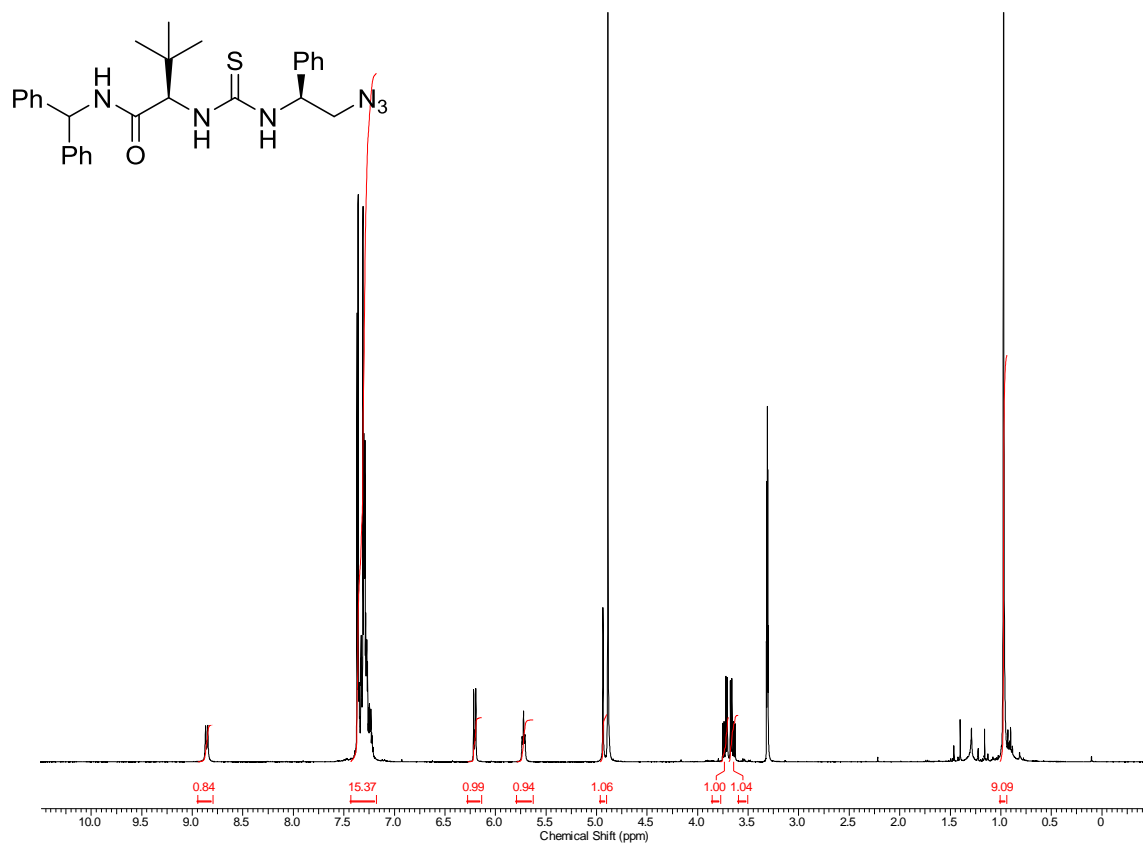

$^{13}\text{C}$  NMR of **11** (100 MHz, MeOD- $d_4$ )

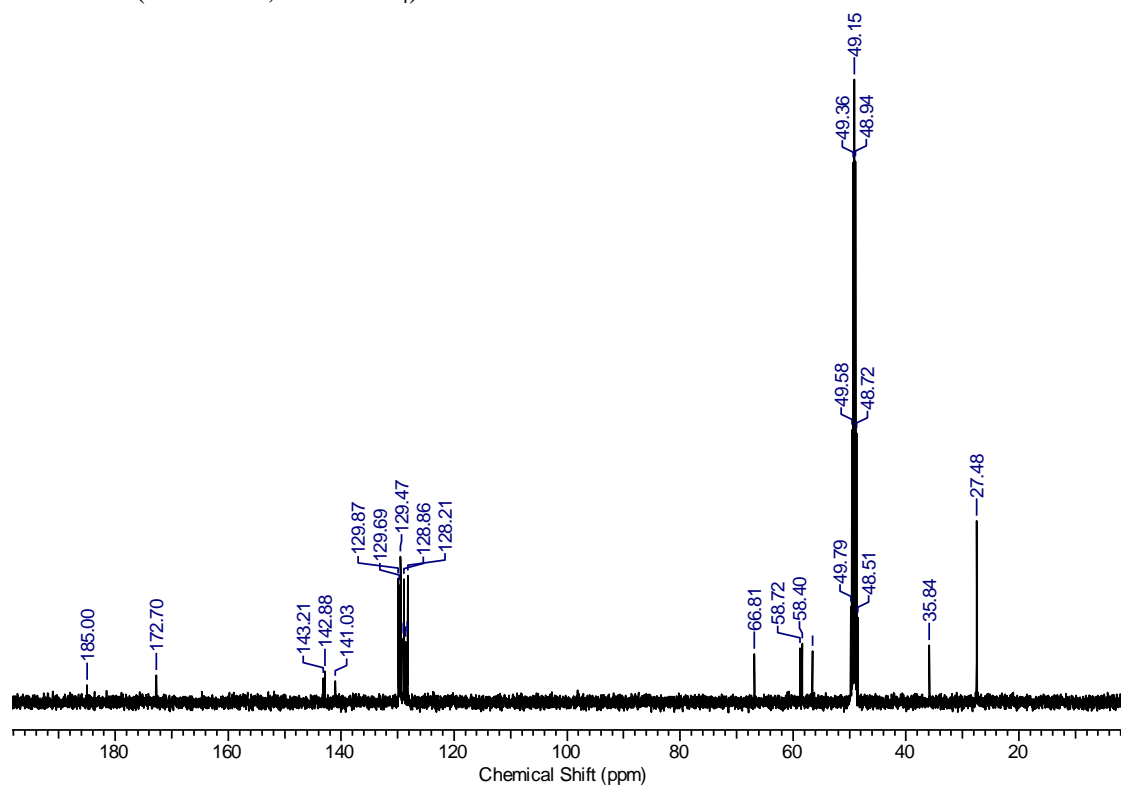

$^1\text{H}$  NMR of **4a** (400 MHz,  $\text{CDCl}_3$ )

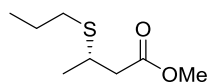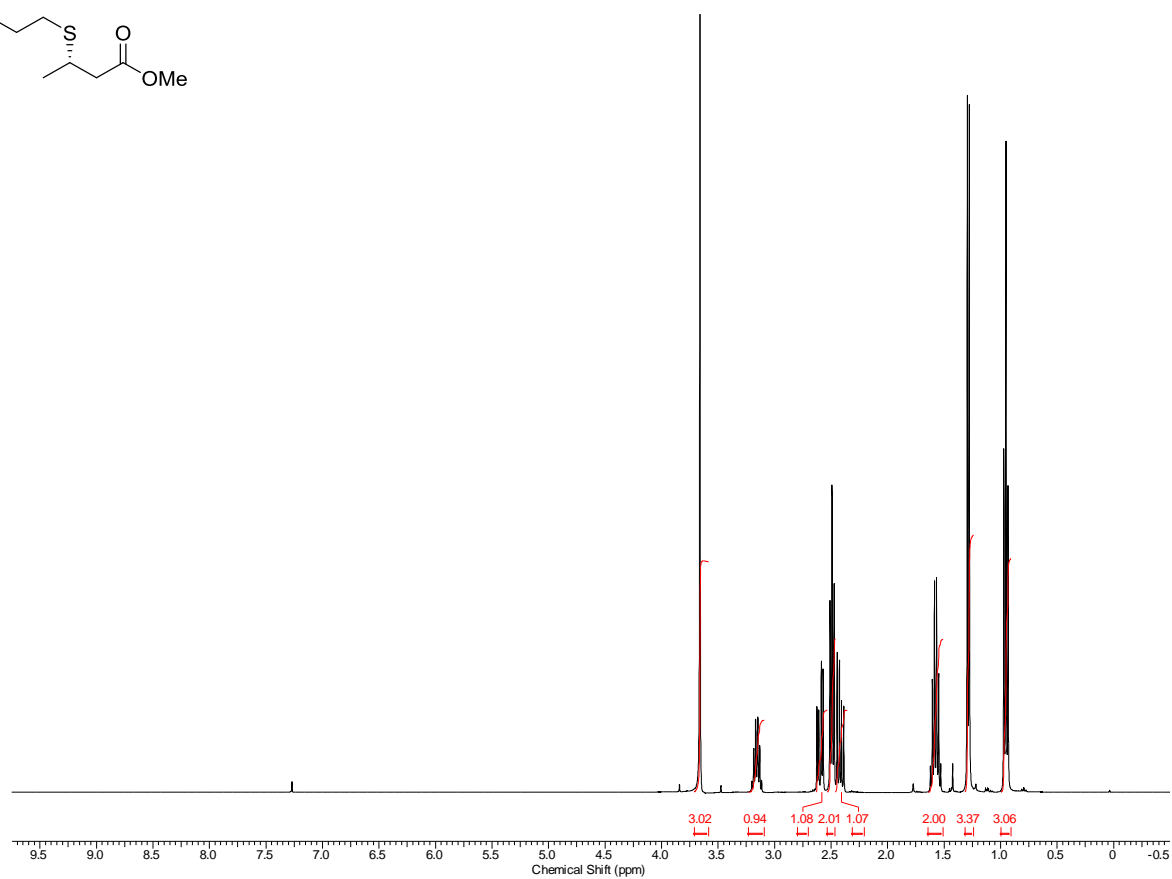

$^{13}\text{C}$  NMR of **4a** (100 MHz,  $\text{CDCl}_3$ )

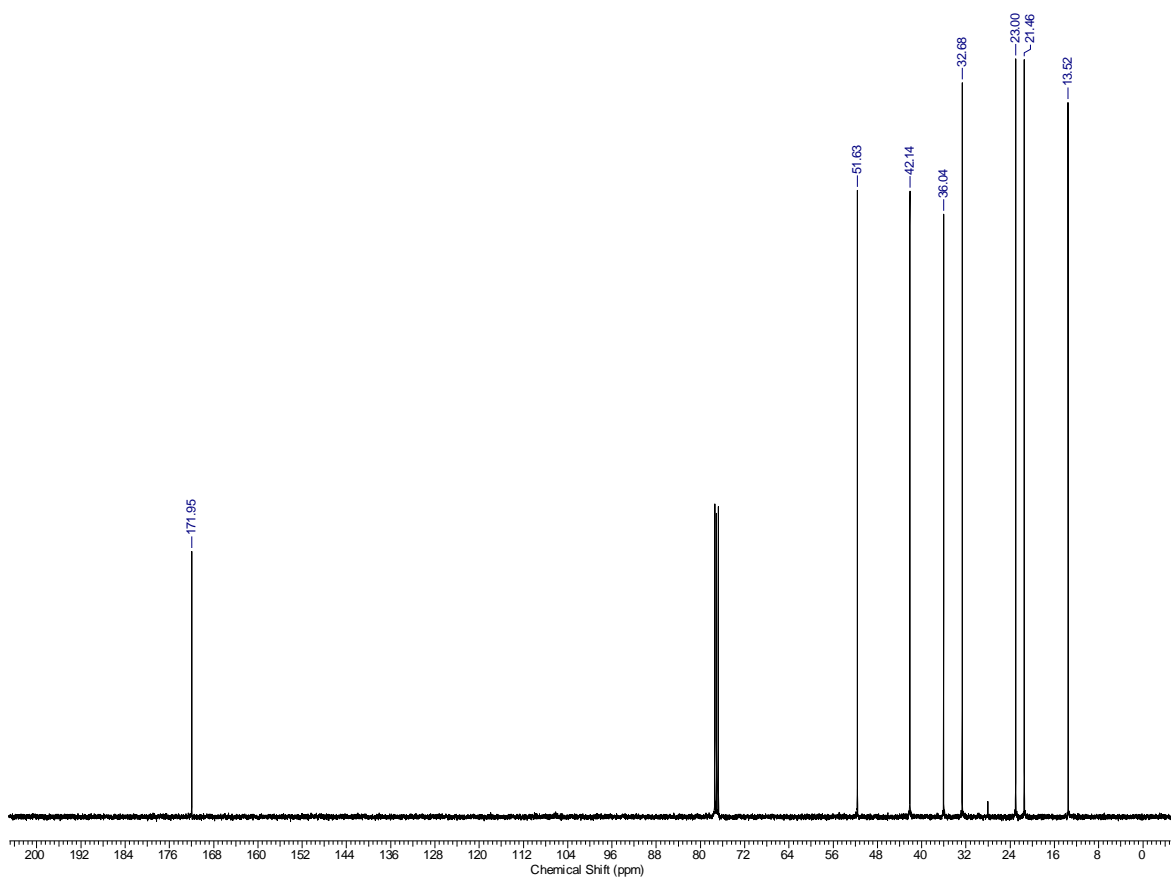

$^1\text{H}$  NMR of **4b** (400 MHz,  $\text{CDCl}_3$ )

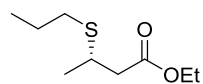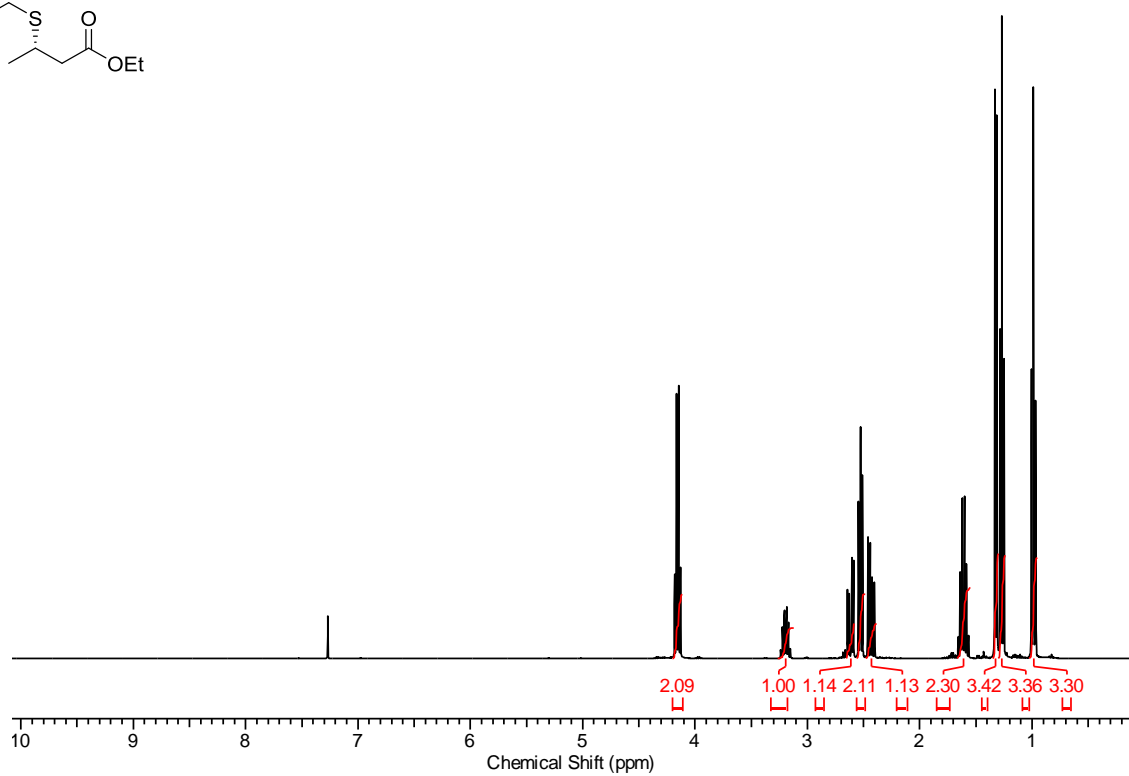

$^{13}\text{C}$  NMR of **4b** (100 MHz,  $\text{CDCl}_3$ )

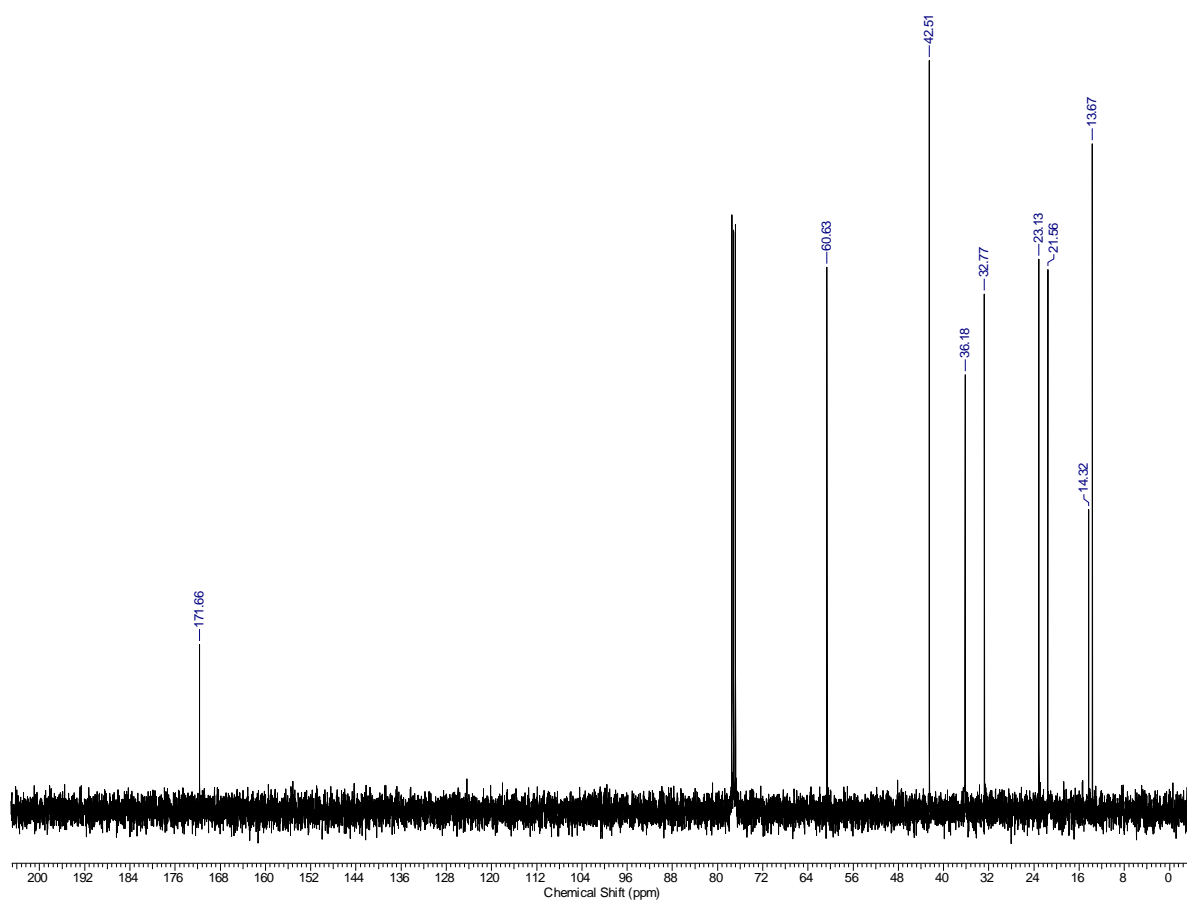

$^1\text{H}$  NMR of **4c** (400 MHz,  $\text{CDCl}_3$ )

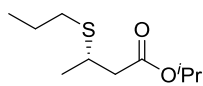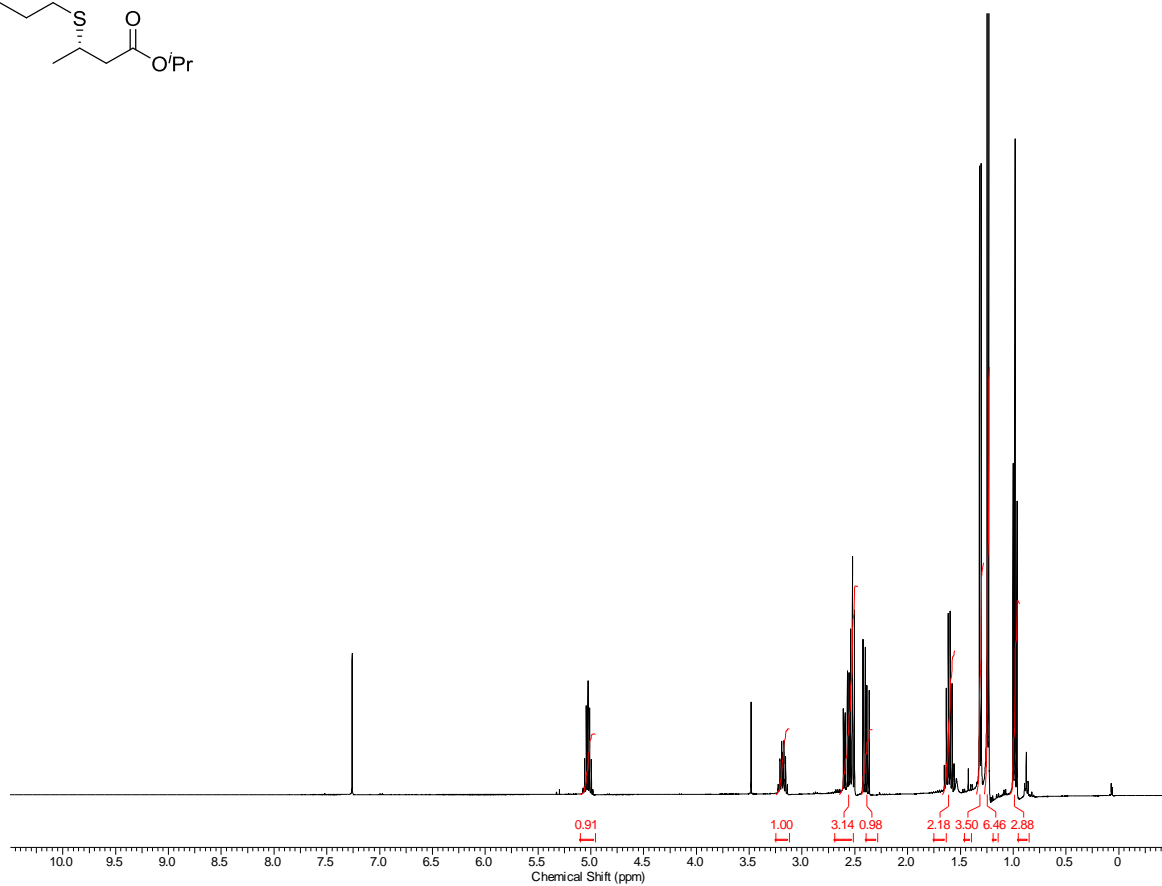

$^{13}\text{C}$  NMR of **4c** (100 MHz,  $\text{CDCl}_3$ )

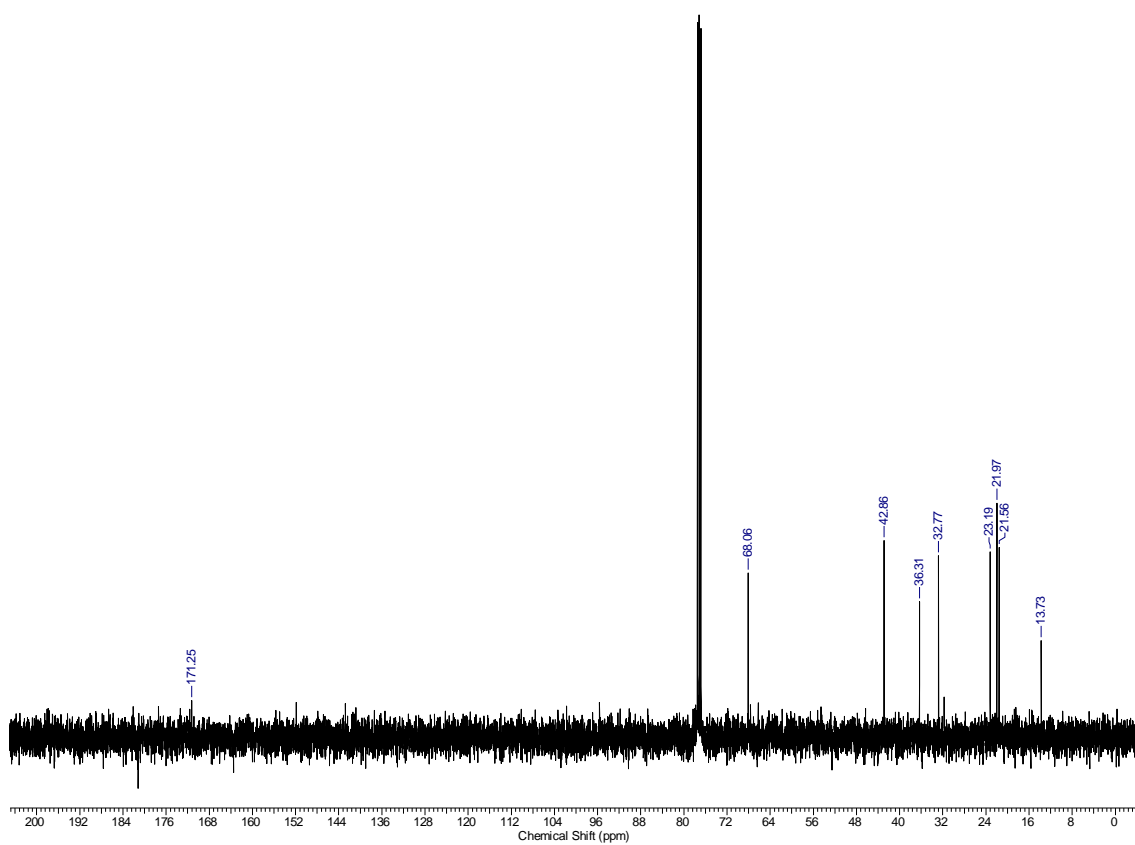

$^1\text{H}$  NMR of **4d** (400 MHz,  $\text{CDCl}_3$ )

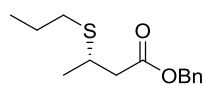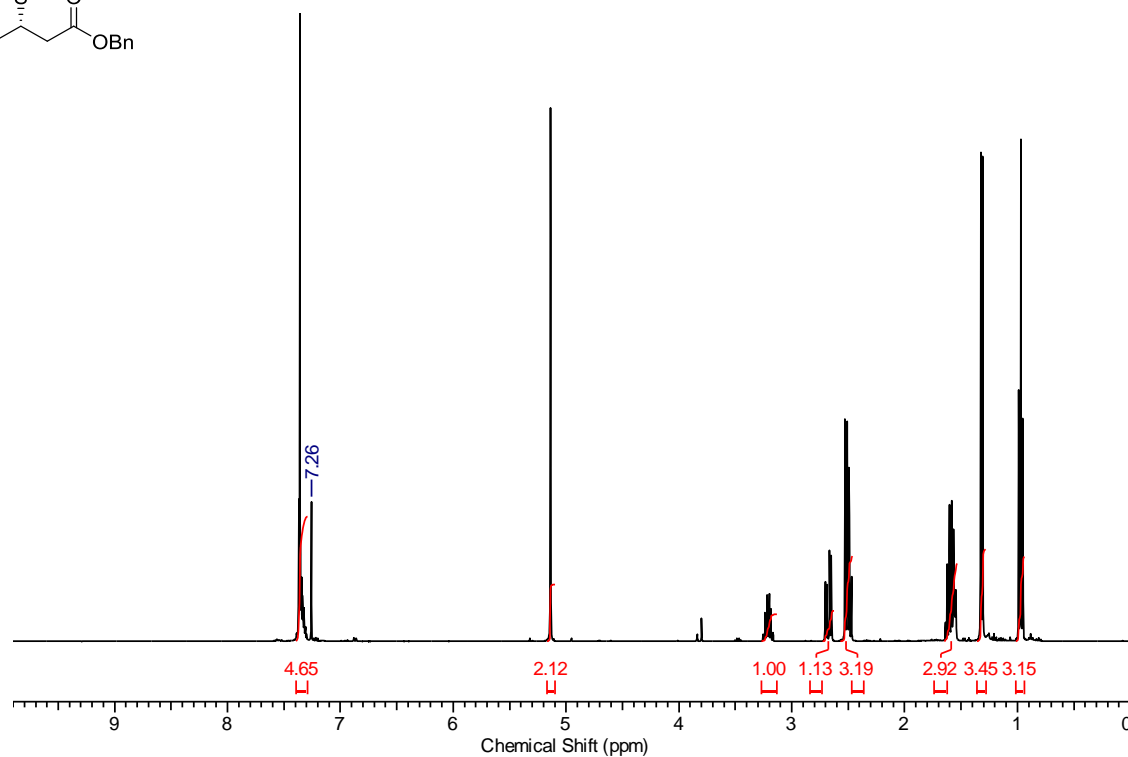

$^{13}\text{C}$  NMR of **4d** (100 MHz,  $\text{CDCl}_3$ )

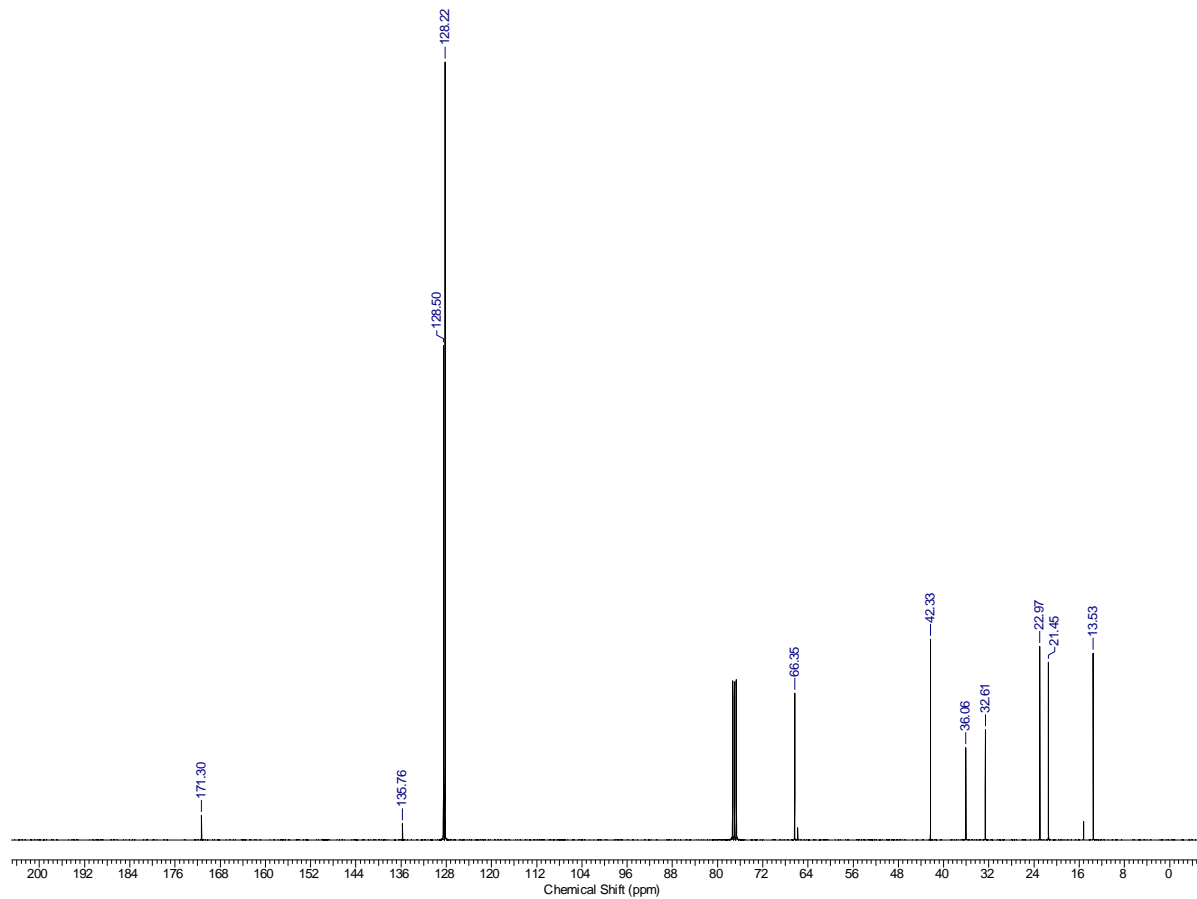

$^1\text{H}$  NMR of **4e** (400 MHz,  $\text{CDCl}_3$ )

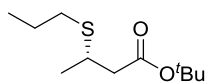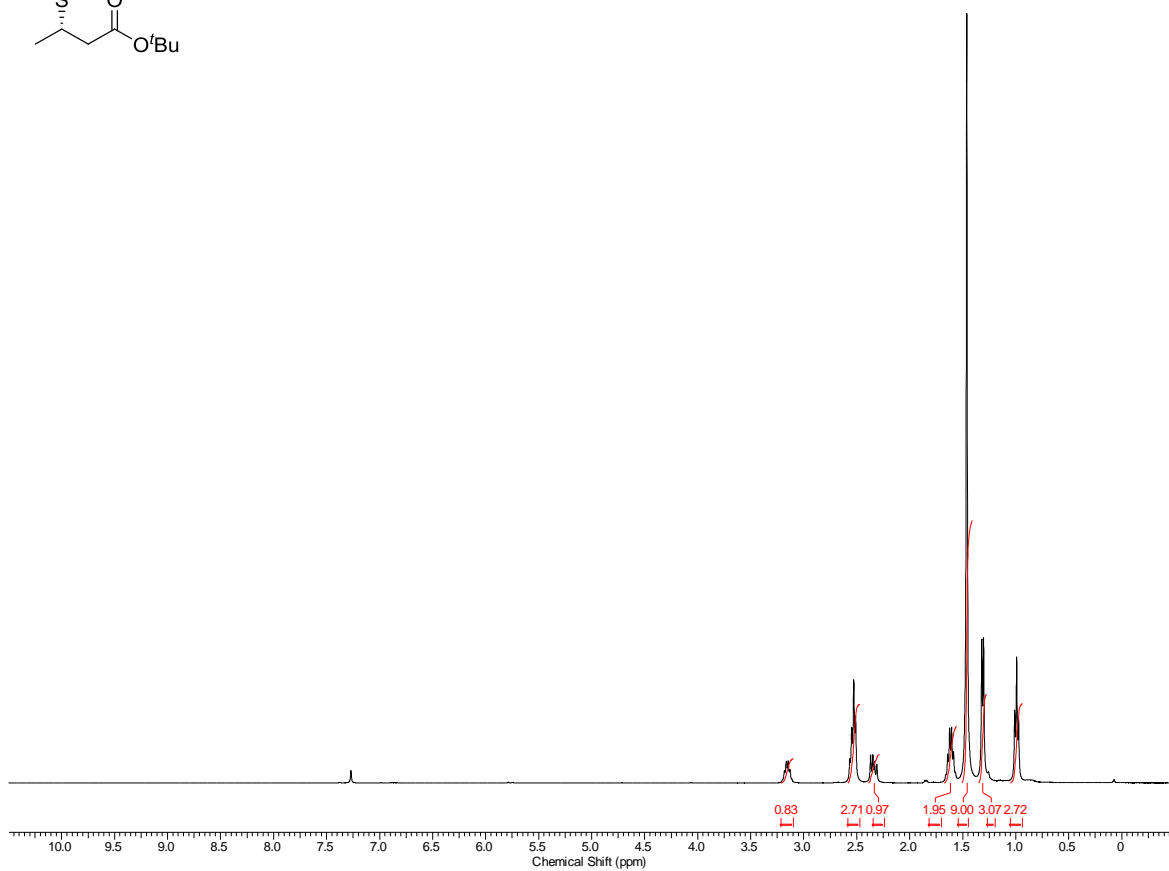

$^{13}\text{C}$  NMR of **4e** (100 MHz,  $\text{CDCl}_3$ )

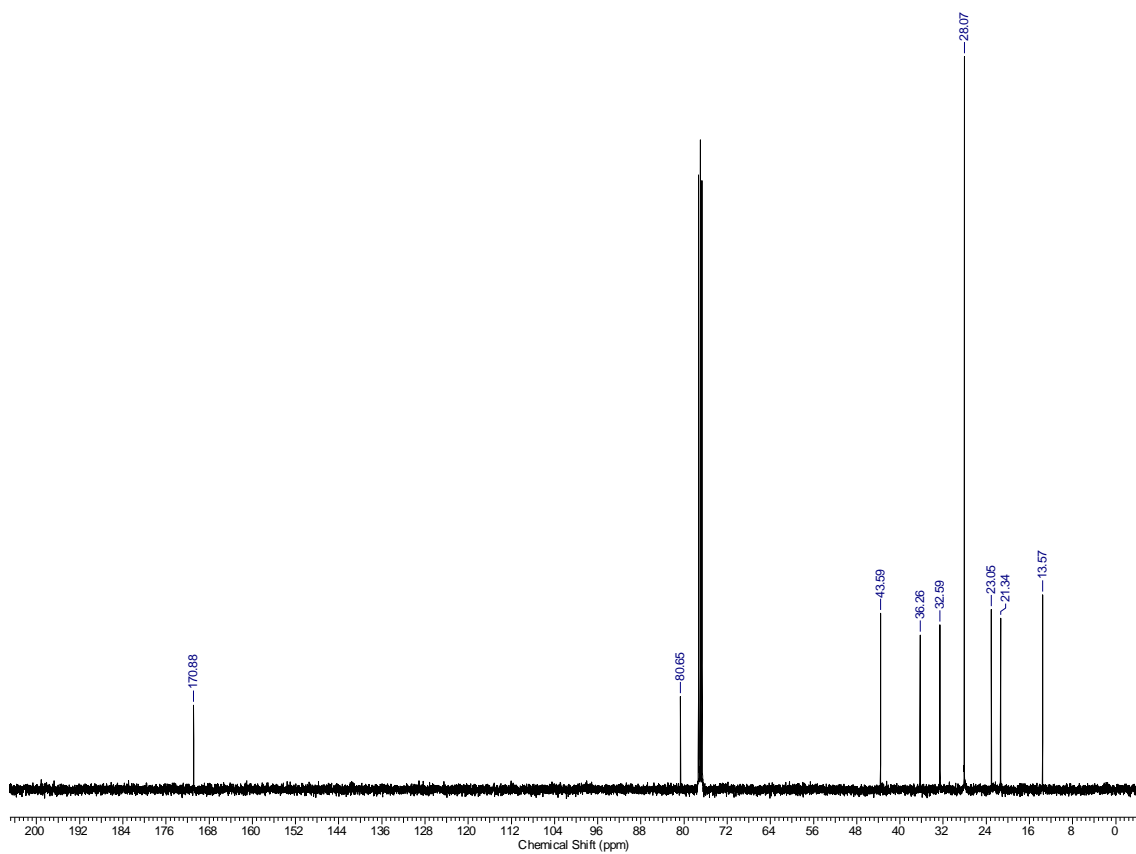



$^1\text{H}$  NMR of **4f** (400 MHz,  $\text{CDCl}_3$ )

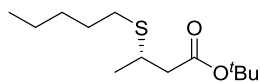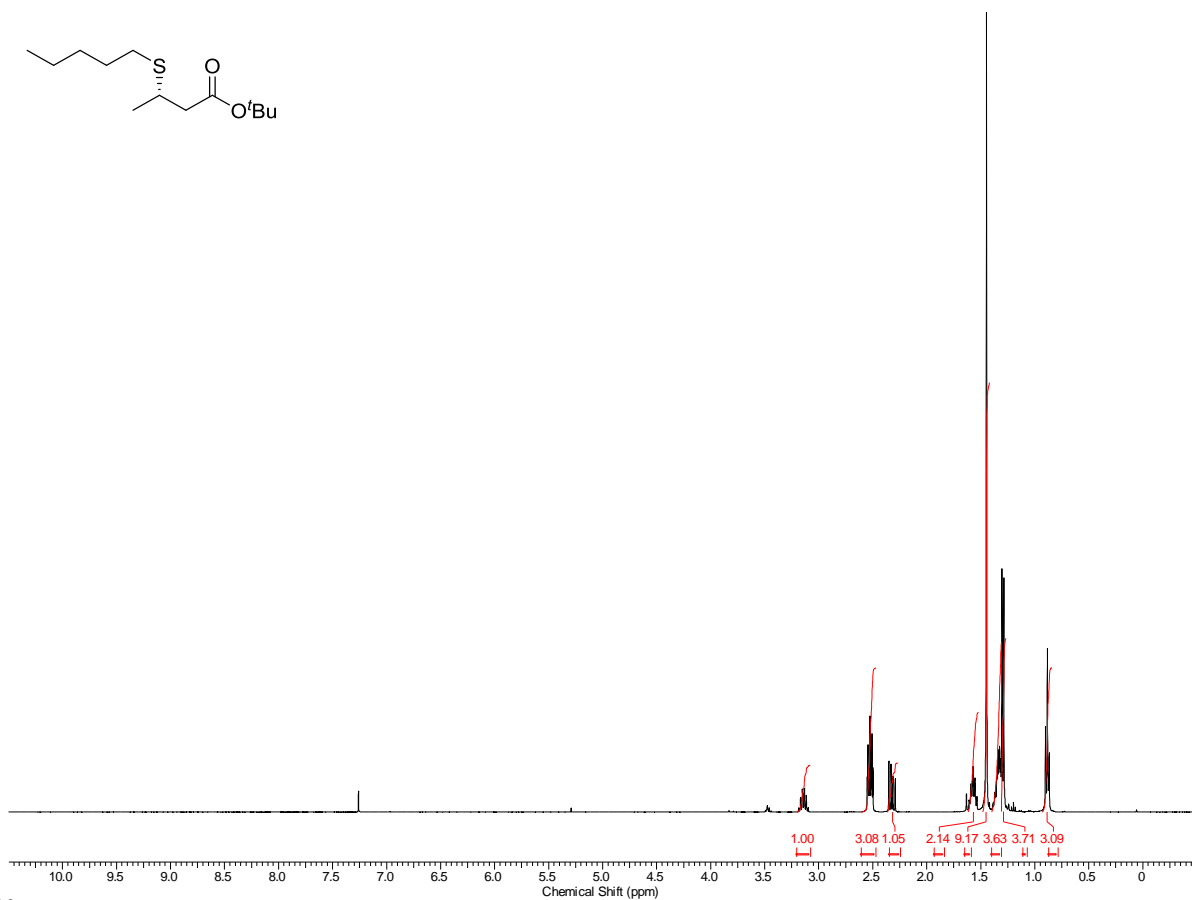

$^{13}\text{C}$  NMR of **4f** (100 MHz,  $\text{CDCl}_3$ )

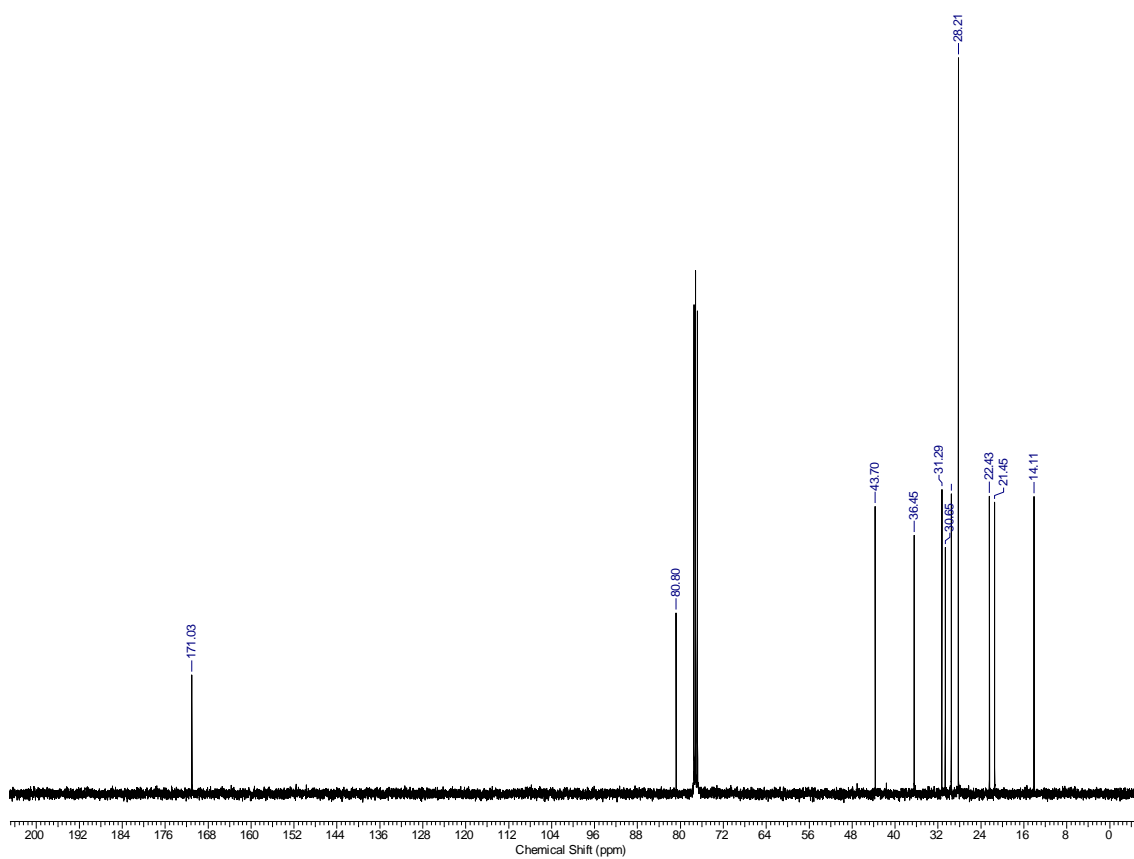

$^1\text{H}$  NMR of **4g** (400 MHz,  $\text{CDCl}_3$ )

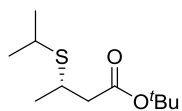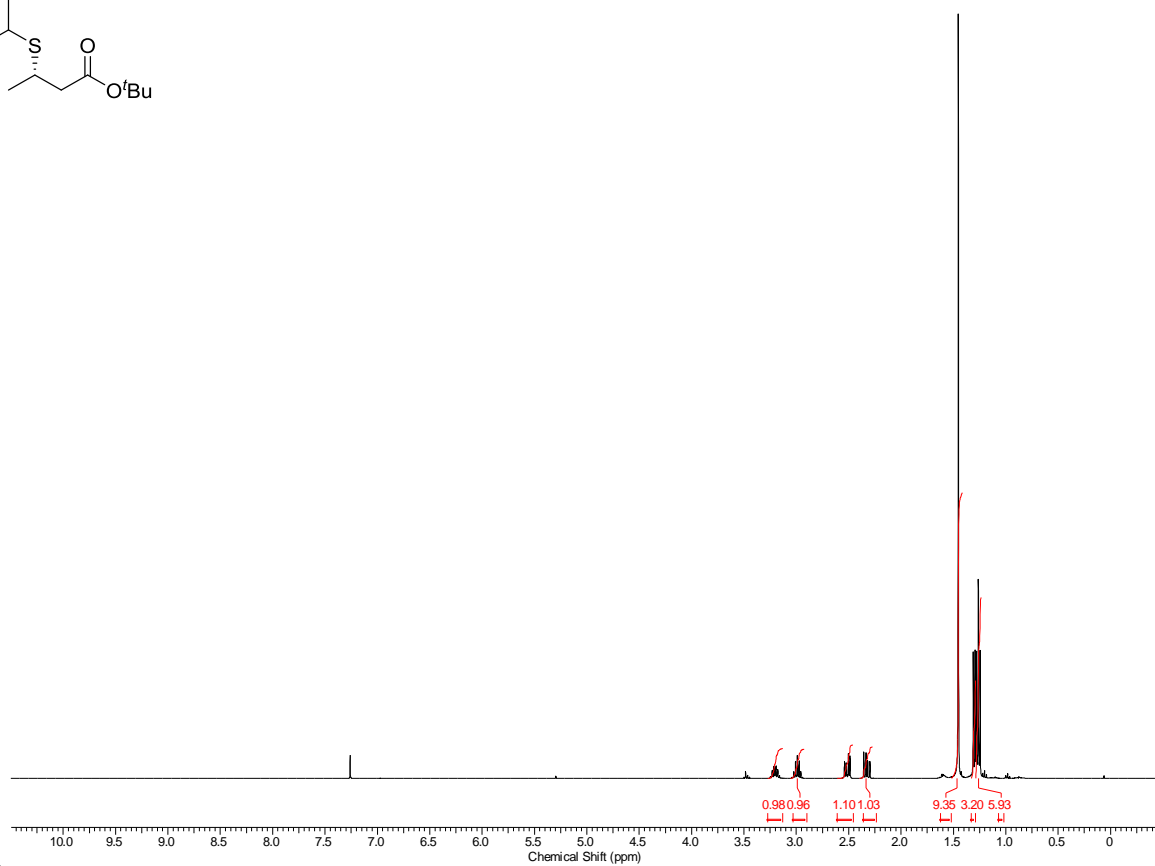

$^{13}\text{C}$  NMR of **4g** (100 MHz,  $\text{CDCl}_3$ )

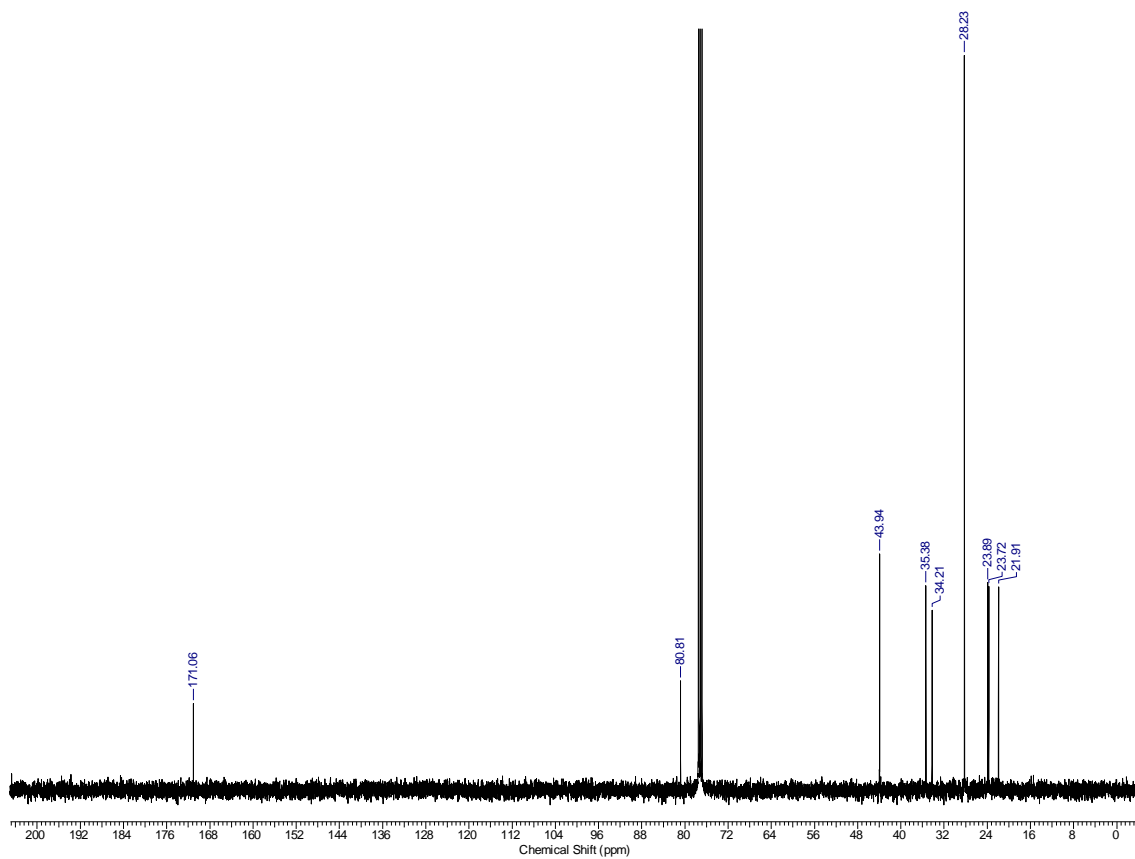

$^1\text{H}$  NMR of **4h** (400 MHz,  $\text{CDCl}_3$ )

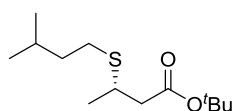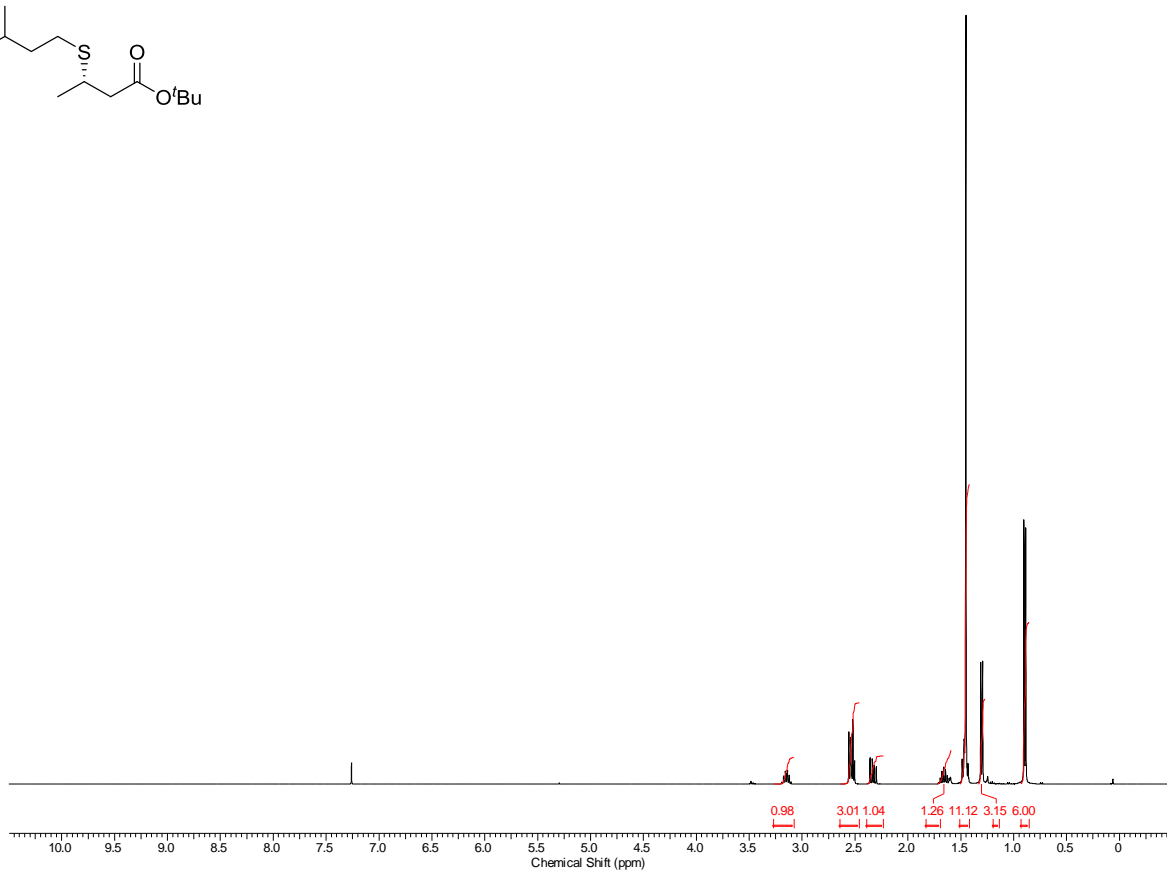

$^{13}\text{C}$  NMR of **4h** (100 MHz)

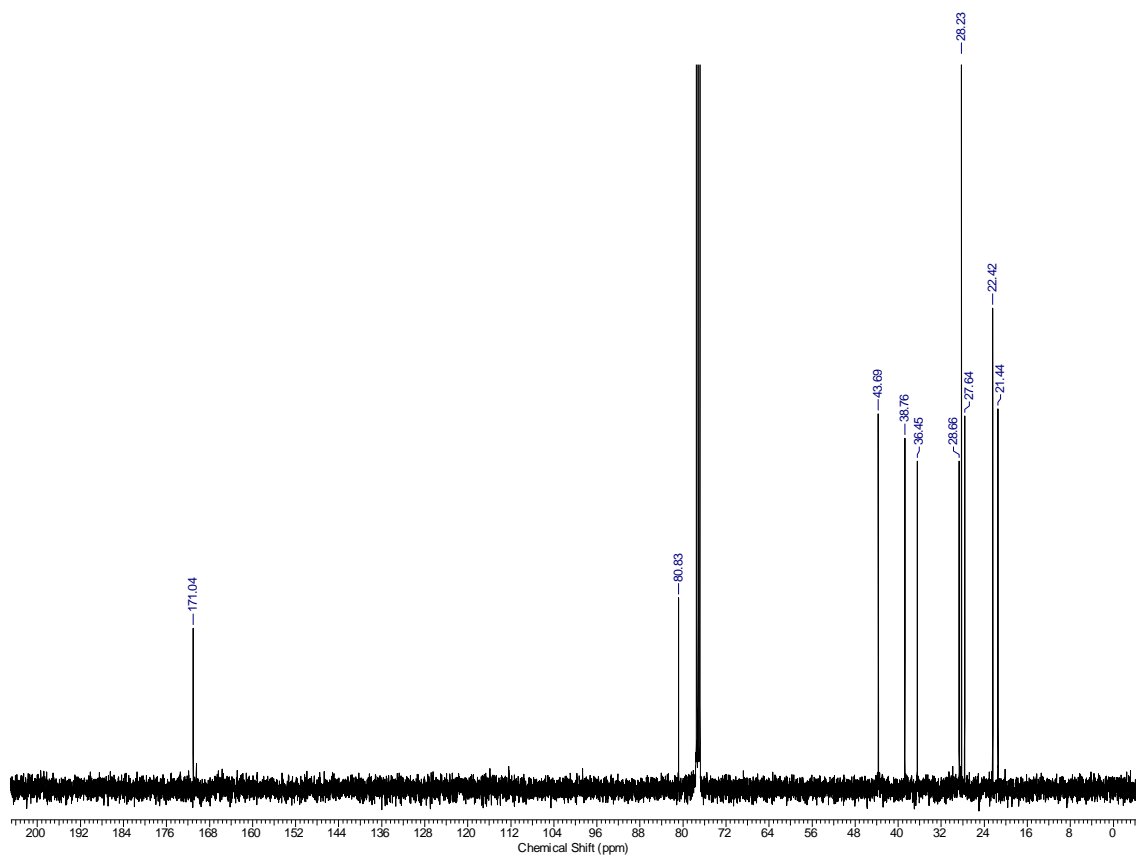

$^1\text{H}$  NMR of **4i** (400 MHz,  $\text{CDCl}_3$ )

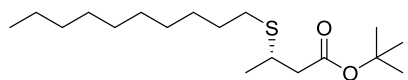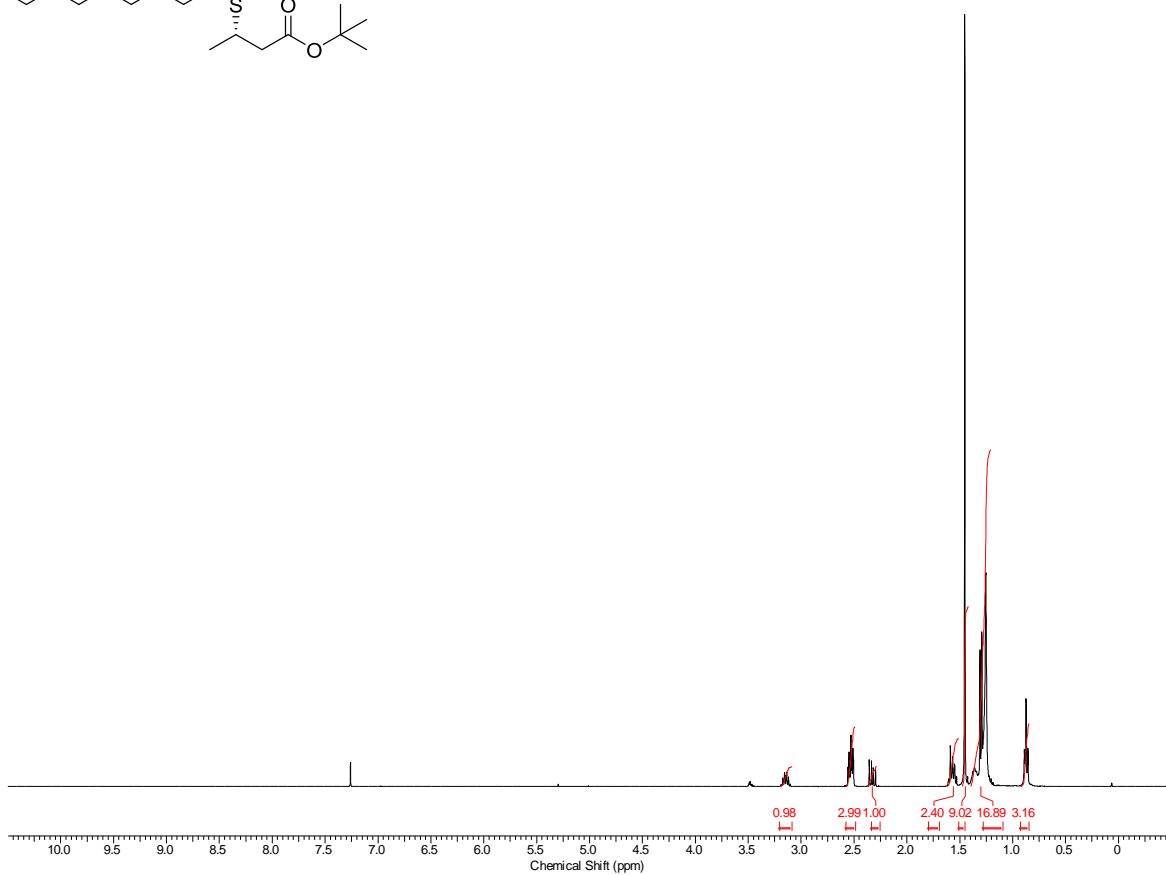

$^{13}\text{C}$  NMR of **4i** (100 MHz,  $\text{CDCl}_3$ )

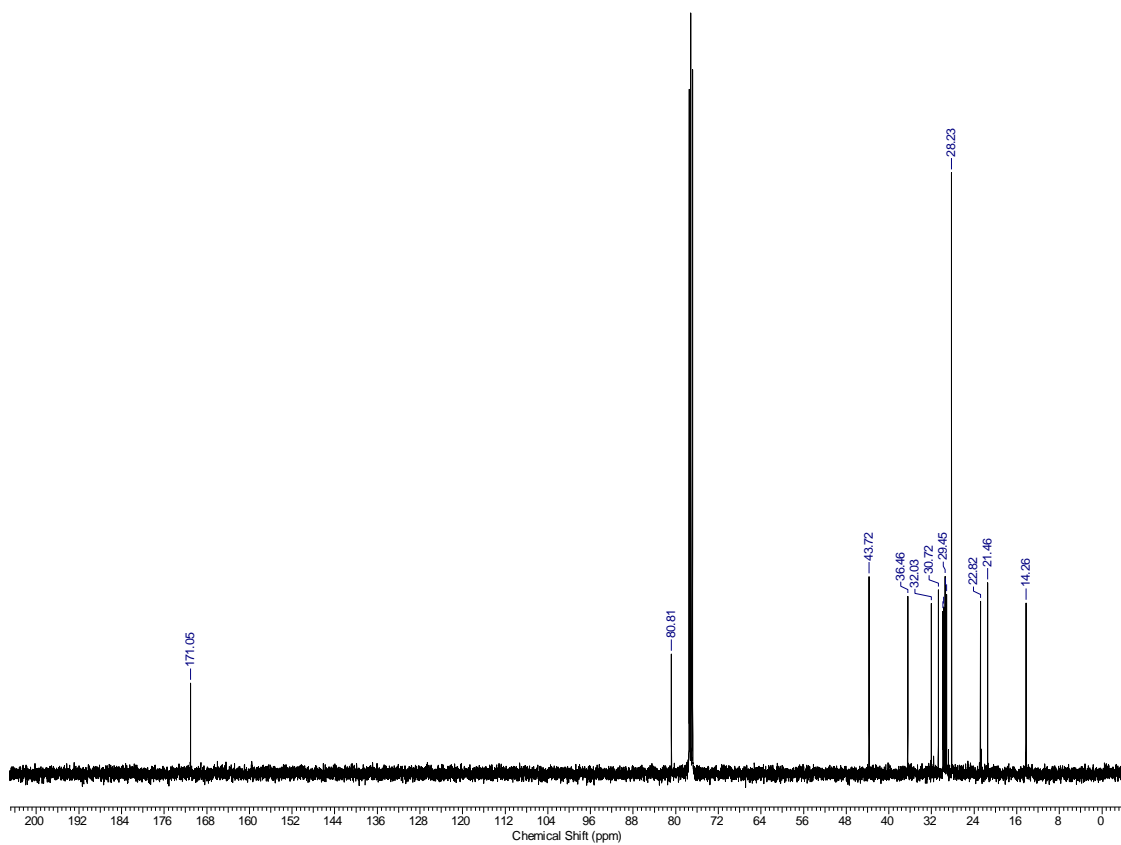

$^1\text{H}$  NMR of **4j** (400 MHz,  $\text{CDCl}_3$ )

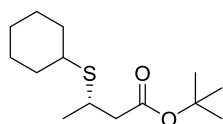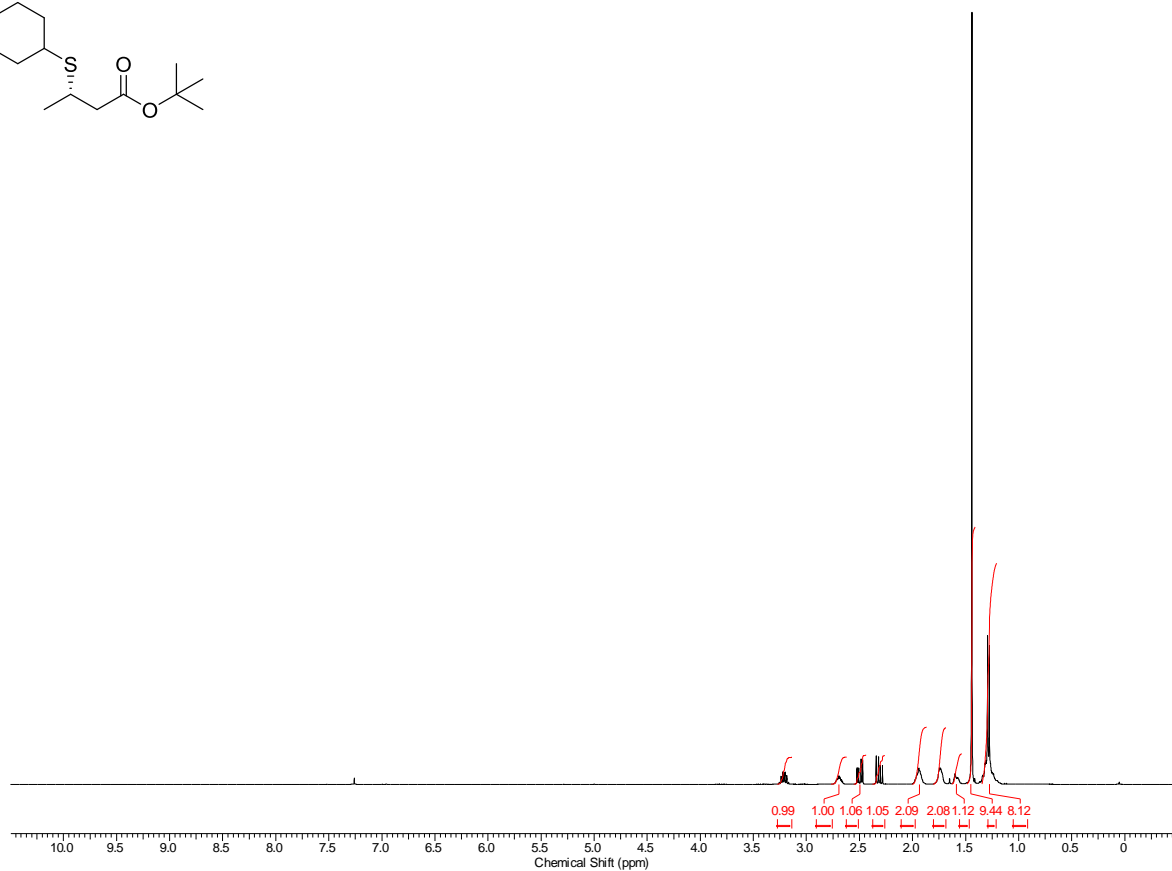

$^{13}\text{C}$  NMR of **4j** (100 MHz,  $\text{CDCl}_3$ )

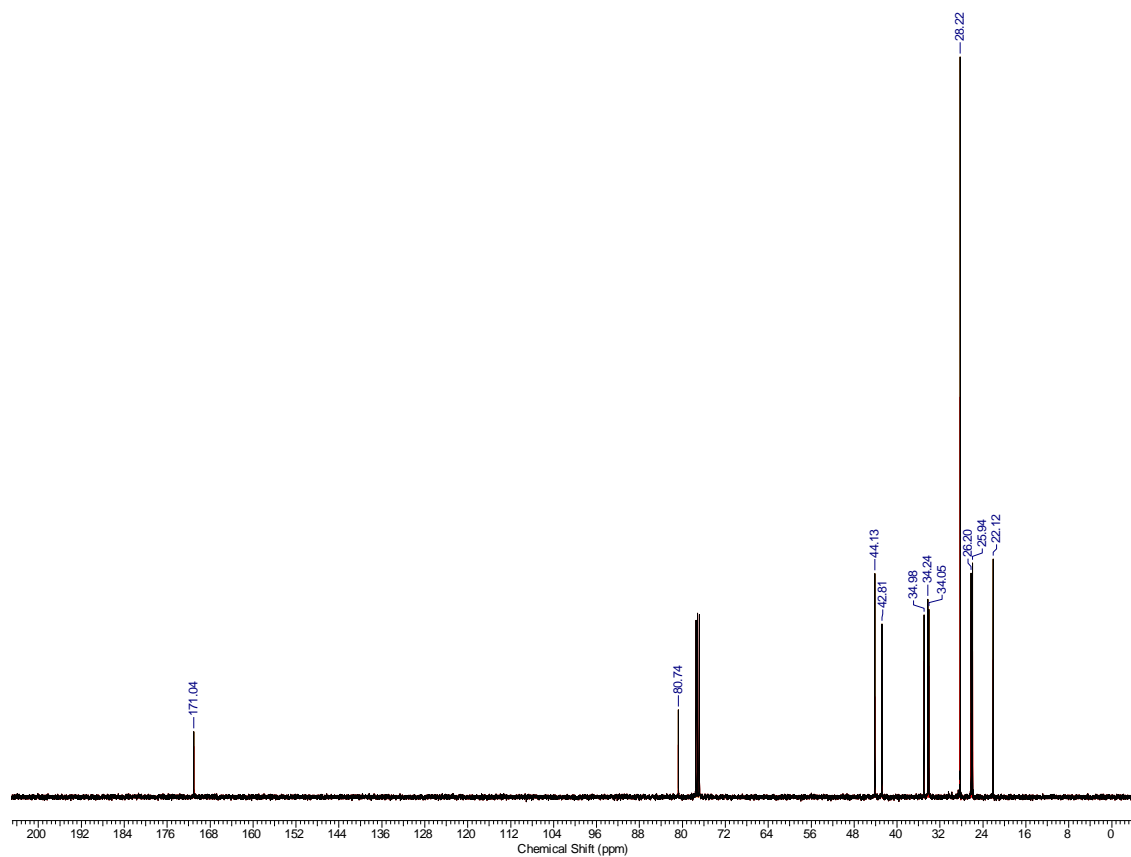

$^1\text{H}$  NMR of **4k** (400 MHz,  $\text{CDCl}_3$ )

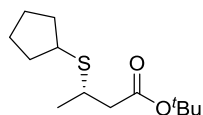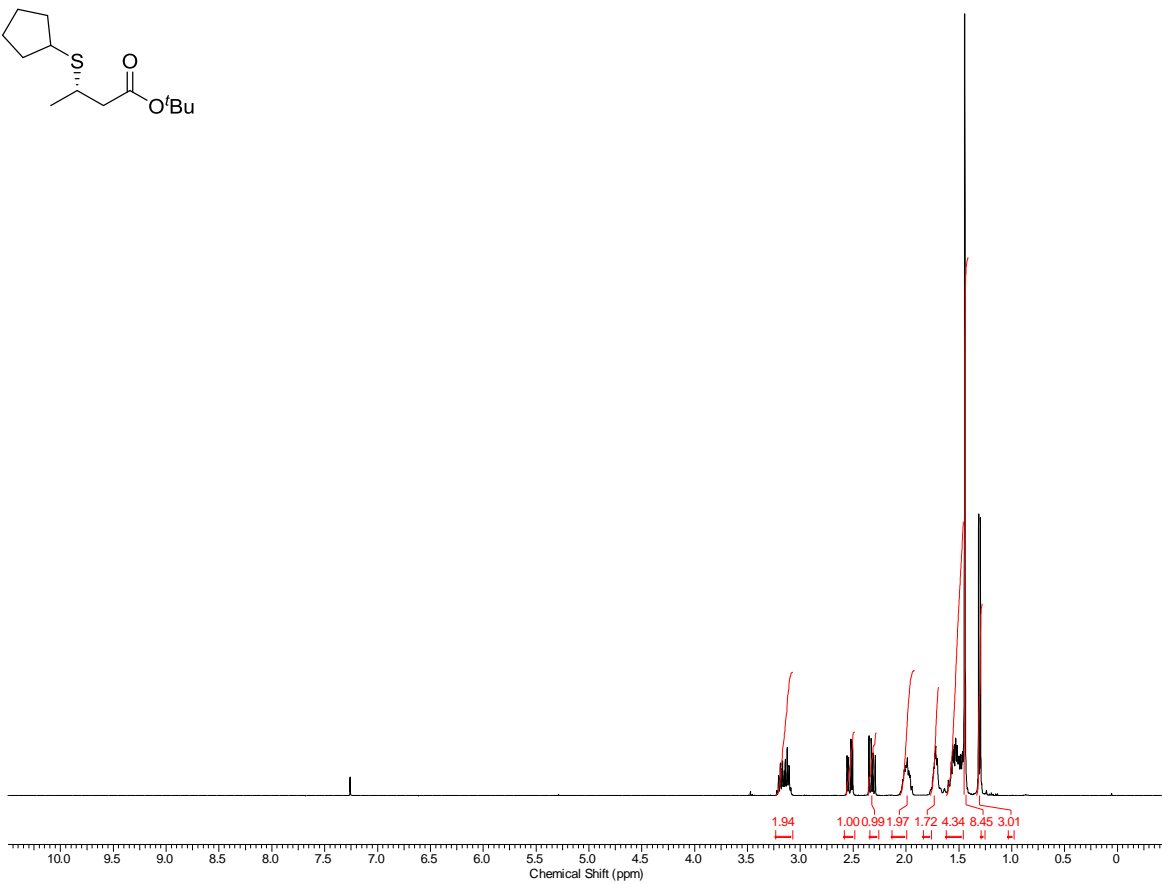

$^{13}\text{C}$  NMR of **4k** (100 MHz,  $\text{CDCl}_3$ )

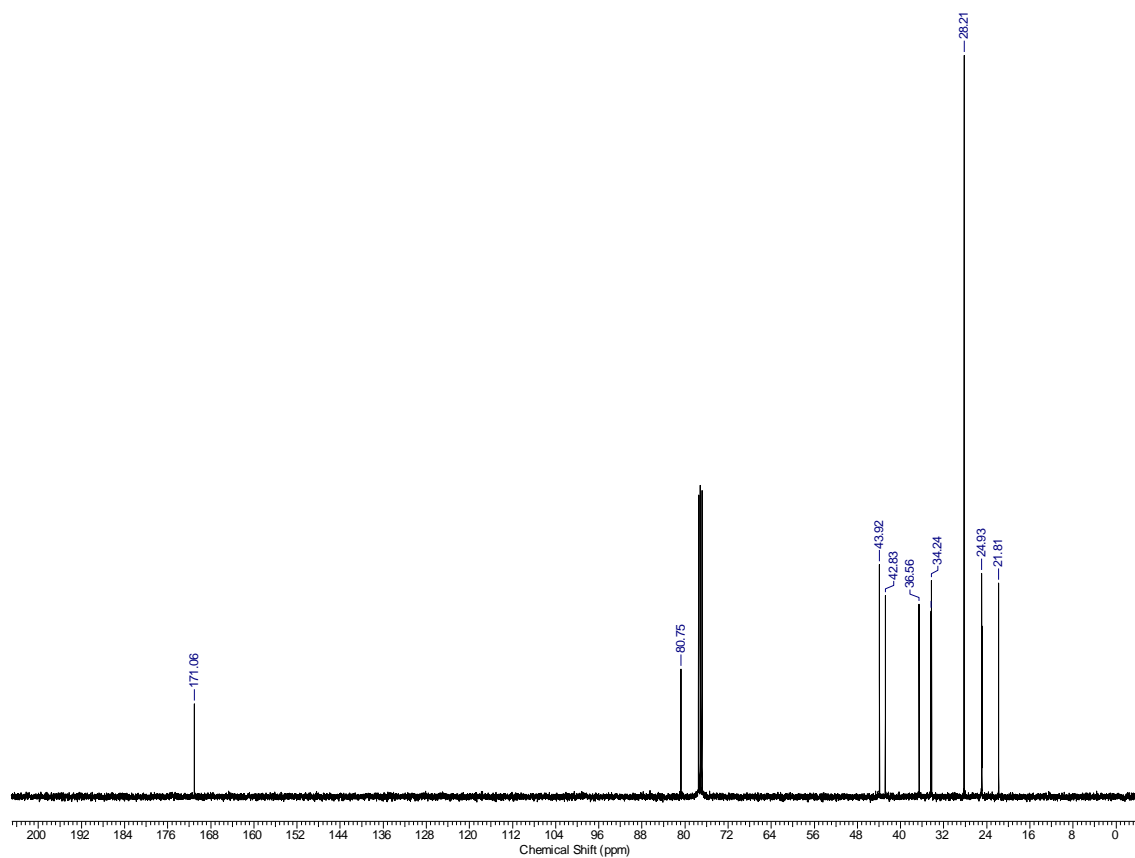

$^1\text{H}$  NMR of **4I** (400 MHz,  $\text{CDCl}_3$ )

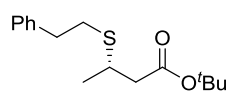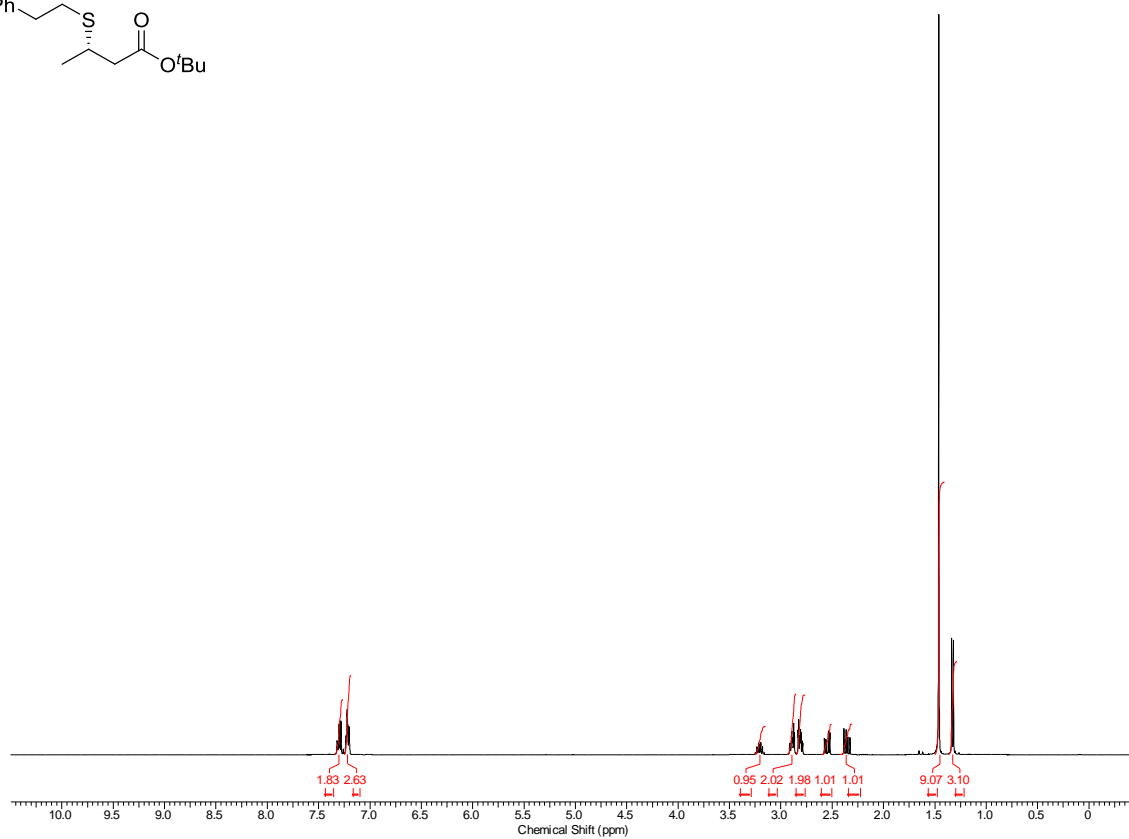

$^{13}\text{C}$  NMR of **4I** (100 MHz,  $\text{CDCl}_3$ )

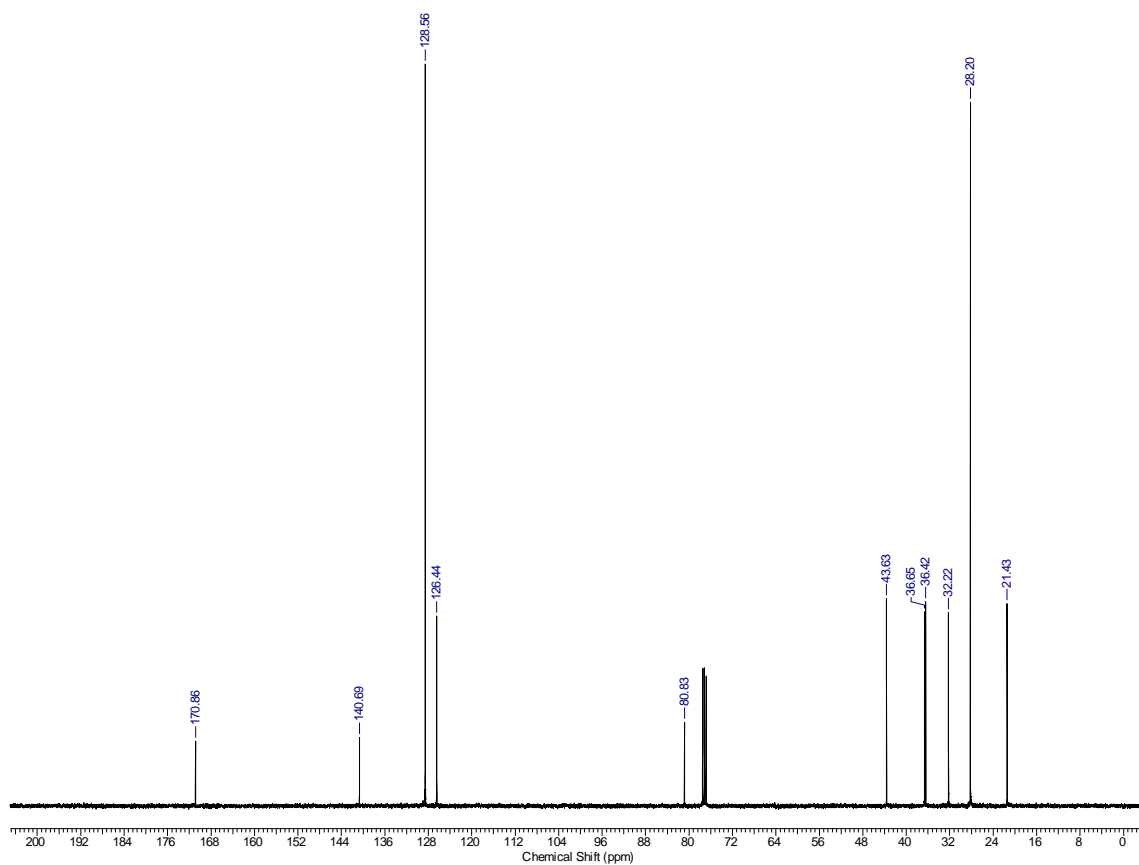

$^1\text{H}$  NMR of **4m** (400 MHz,  $\text{CDCl}_3$ )

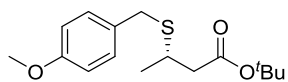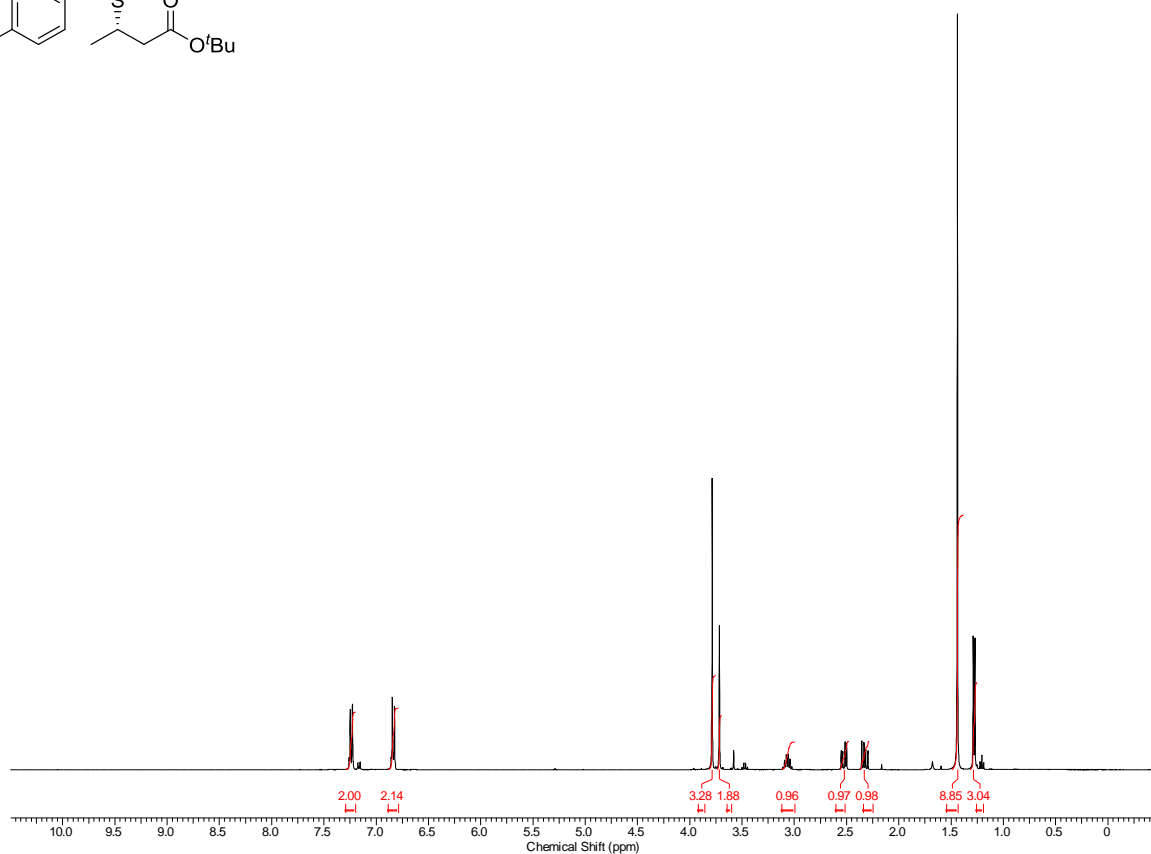

$^{13}\text{C}$  NMR of **4m** (100 MHz,  $\text{CDCl}_3$ )

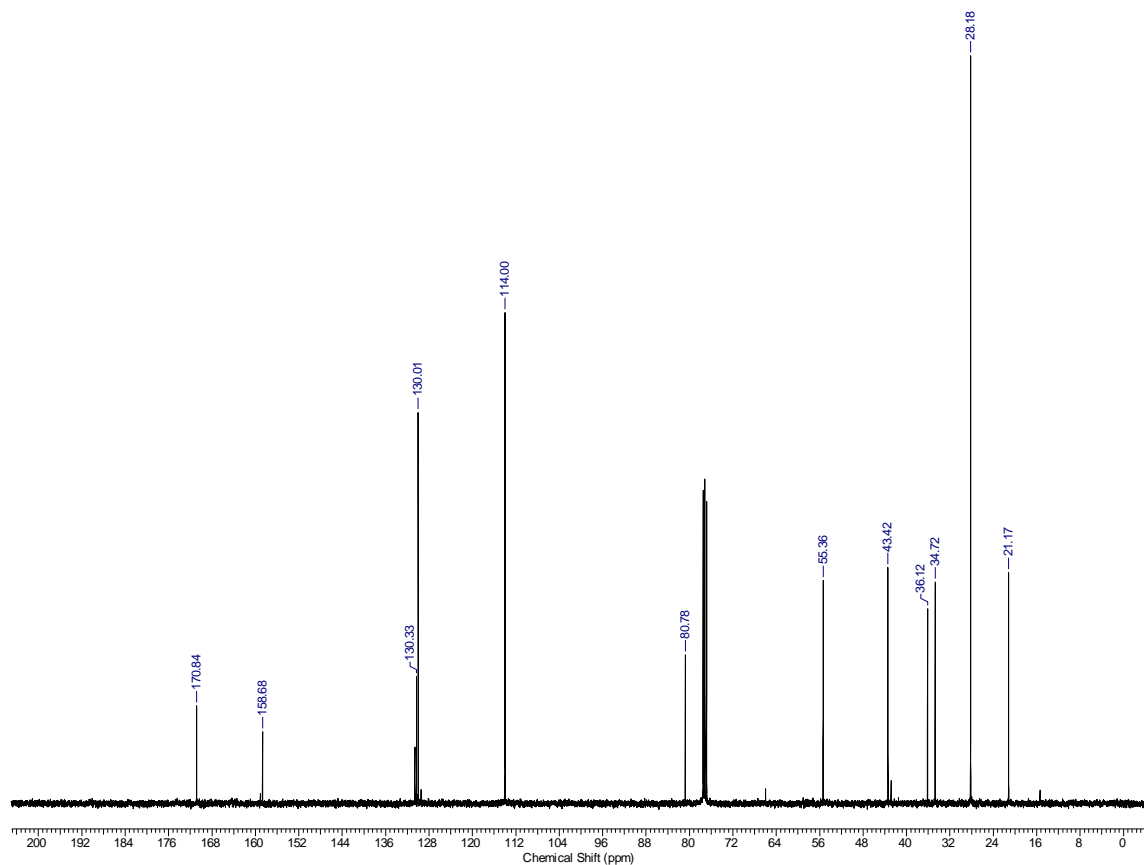



$^1\text{H}$  NMR of **4n** (400 MHz,  $\text{CDCl}_3$ )

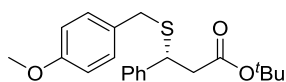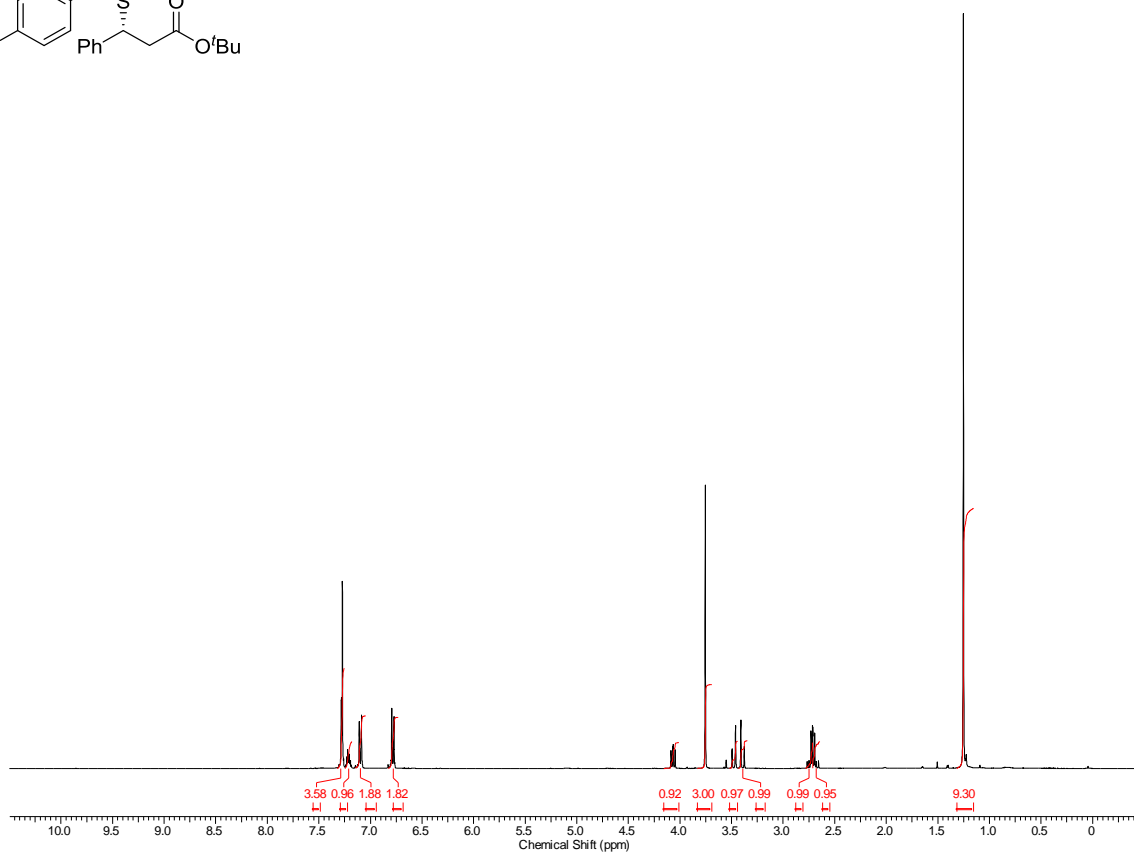

$^{13}\text{C}$  NMR of **4n** (100 MHz,  $\text{CDCl}_3$ )

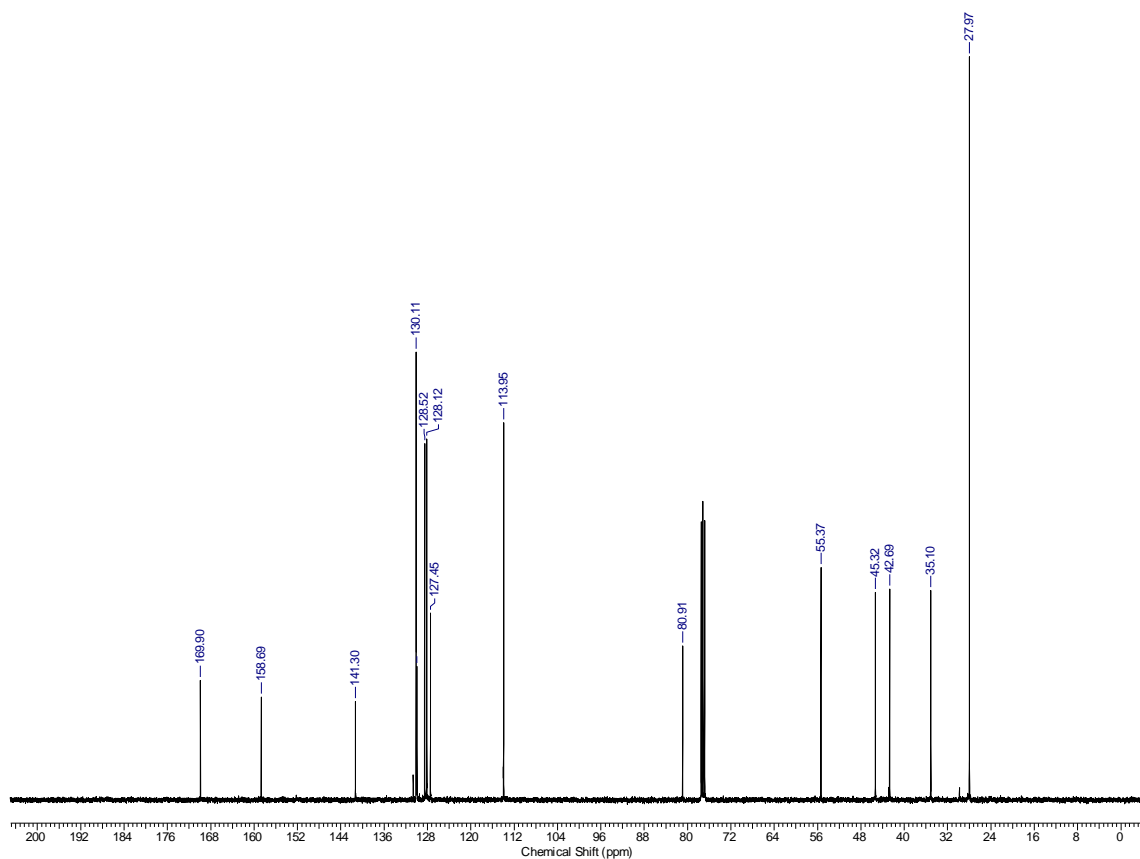

$^1\text{H}$  NMR of **4o** (400 MHz,  $\text{CDCl}_3$ )

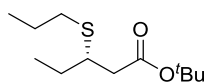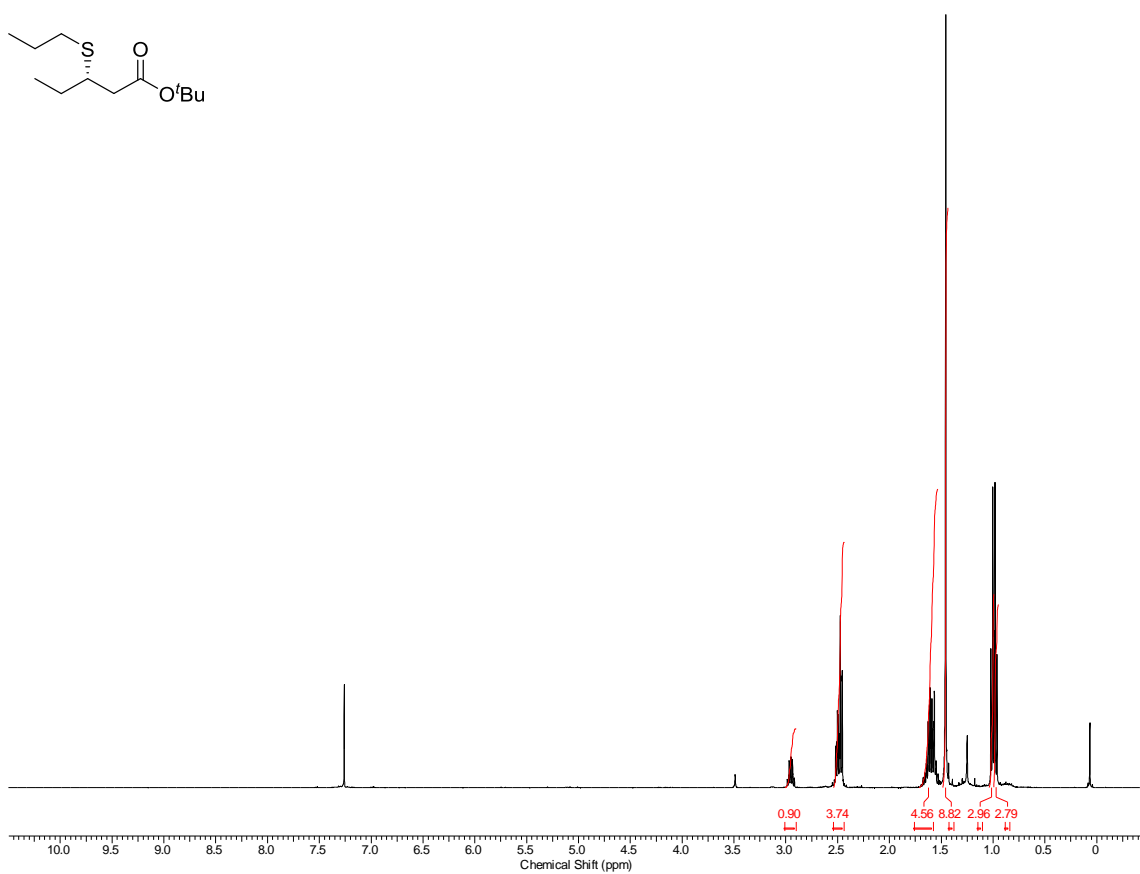

$^{13}\text{C}$  NMR of **4o** (100 MHz,  $\text{CDCl}_3$ )

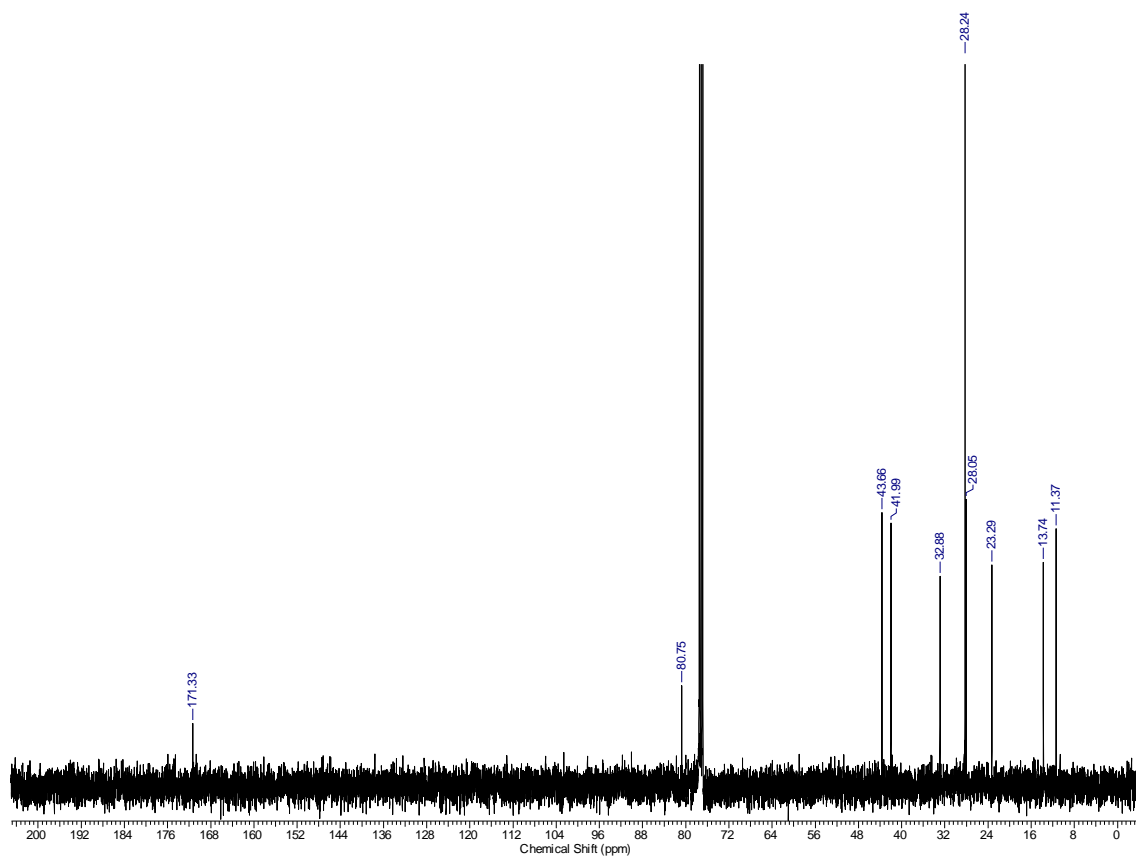

$^1\text{H}$  NMR of **4p** (400 MHz,  $\text{CDCl}_3$ )

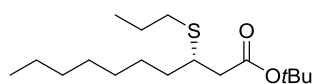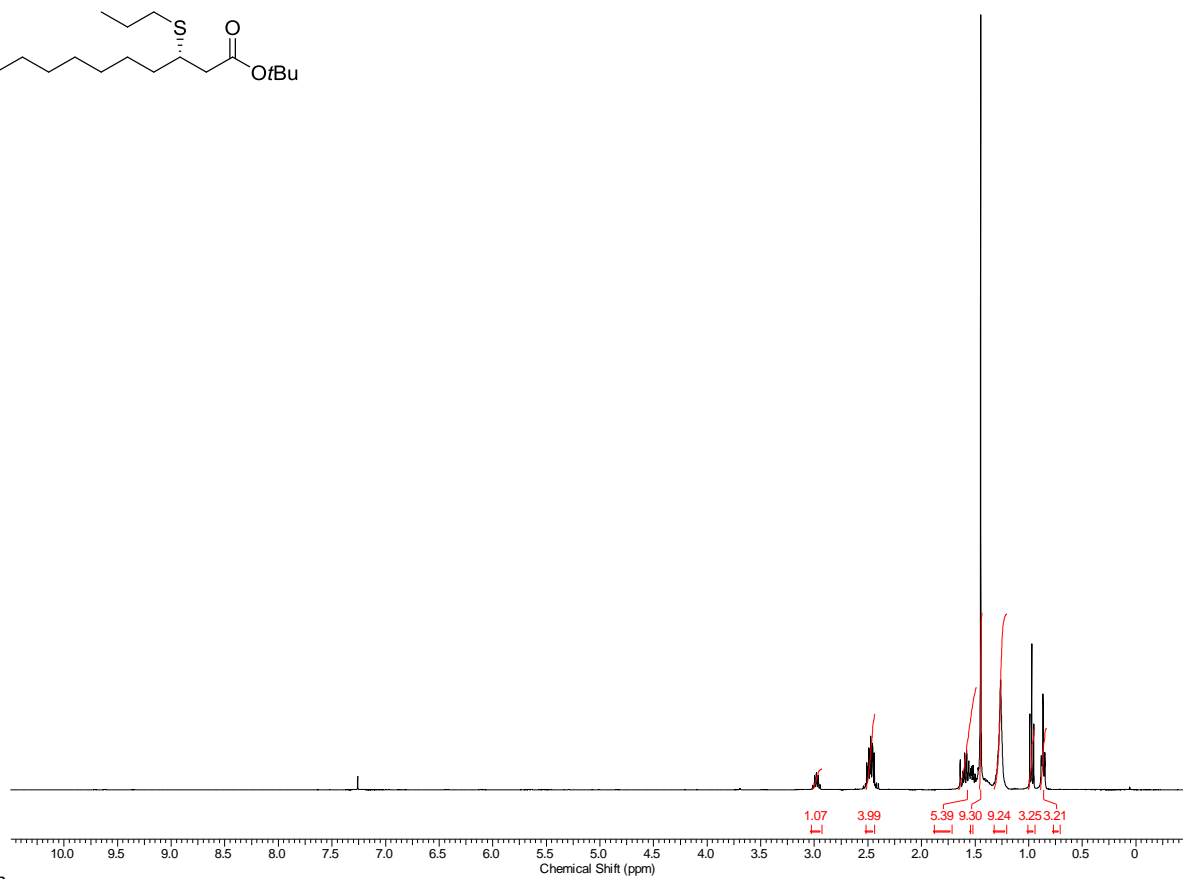

$^{13}\text{C}$  NMR of **4p** (100 MHz,  $\text{CDCl}_3$ )

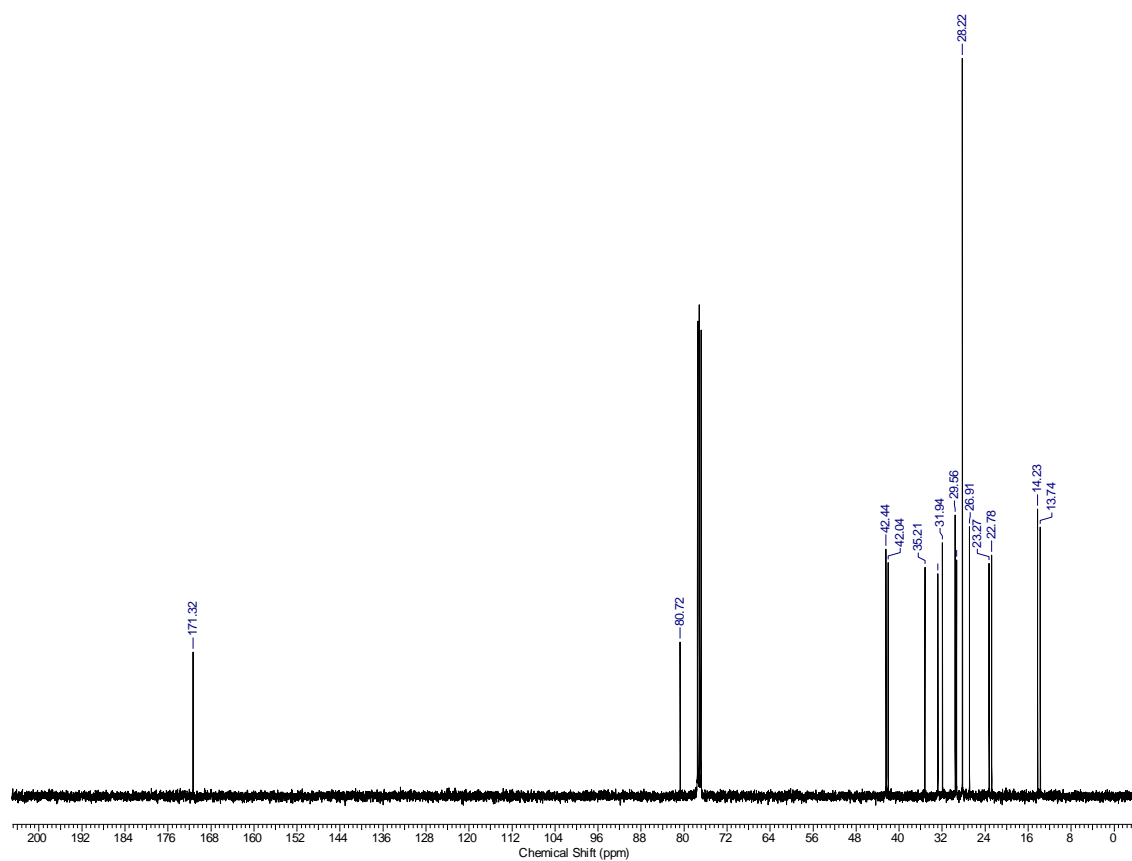

$^1\text{H}$  NMR of **4q** (400 MHz,  $\text{CDCl}_3$ )

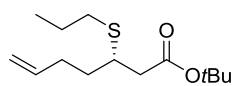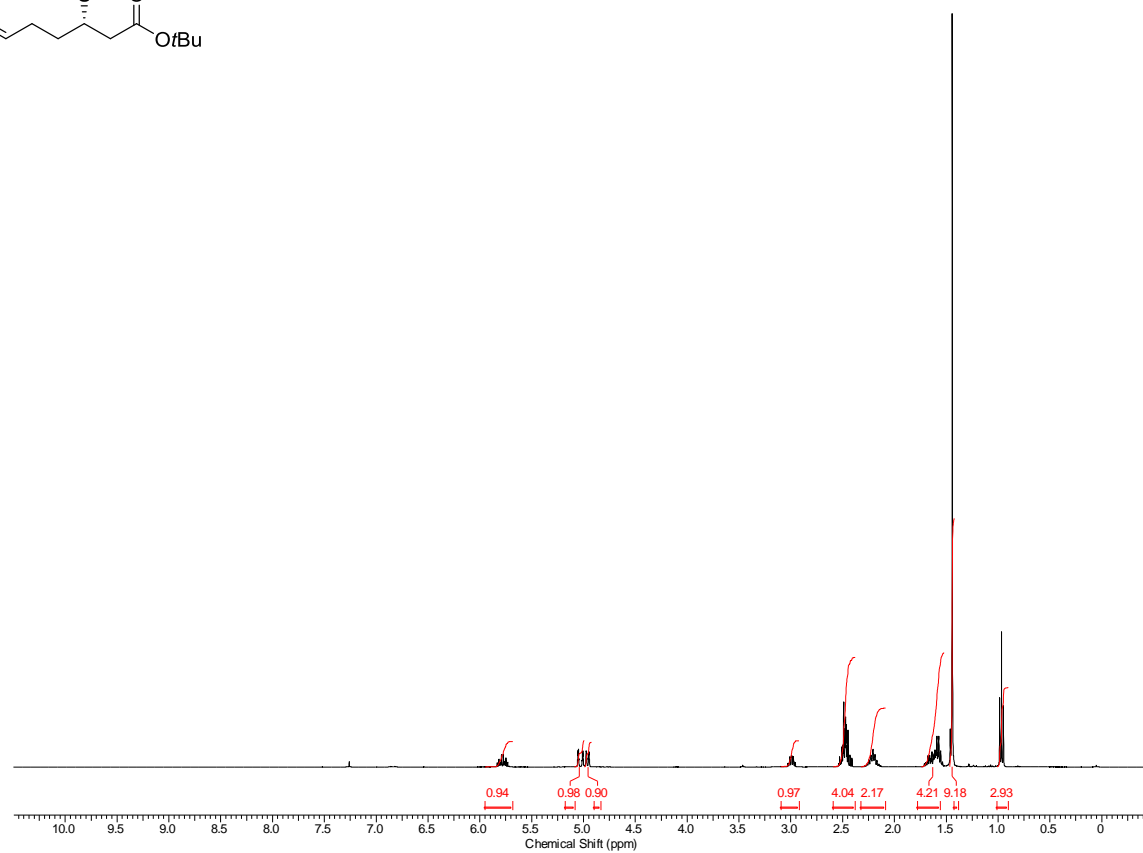

$^{13}\text{C}$  NMR of **4q** (100 MHz,  $\text{CDCl}_3$ )

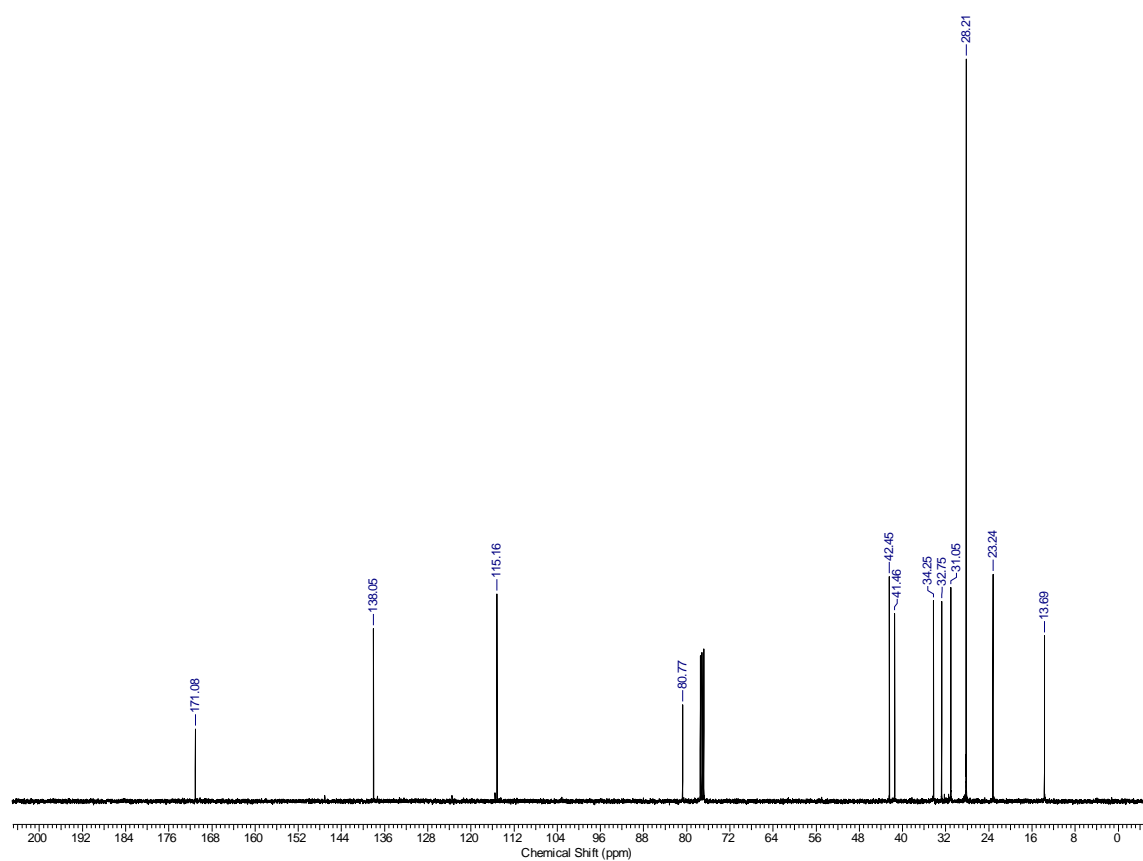

$^1\text{H}$  NMR of **4r** (400 MHz,  $\text{CDCl}_3$ )

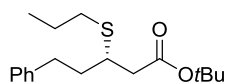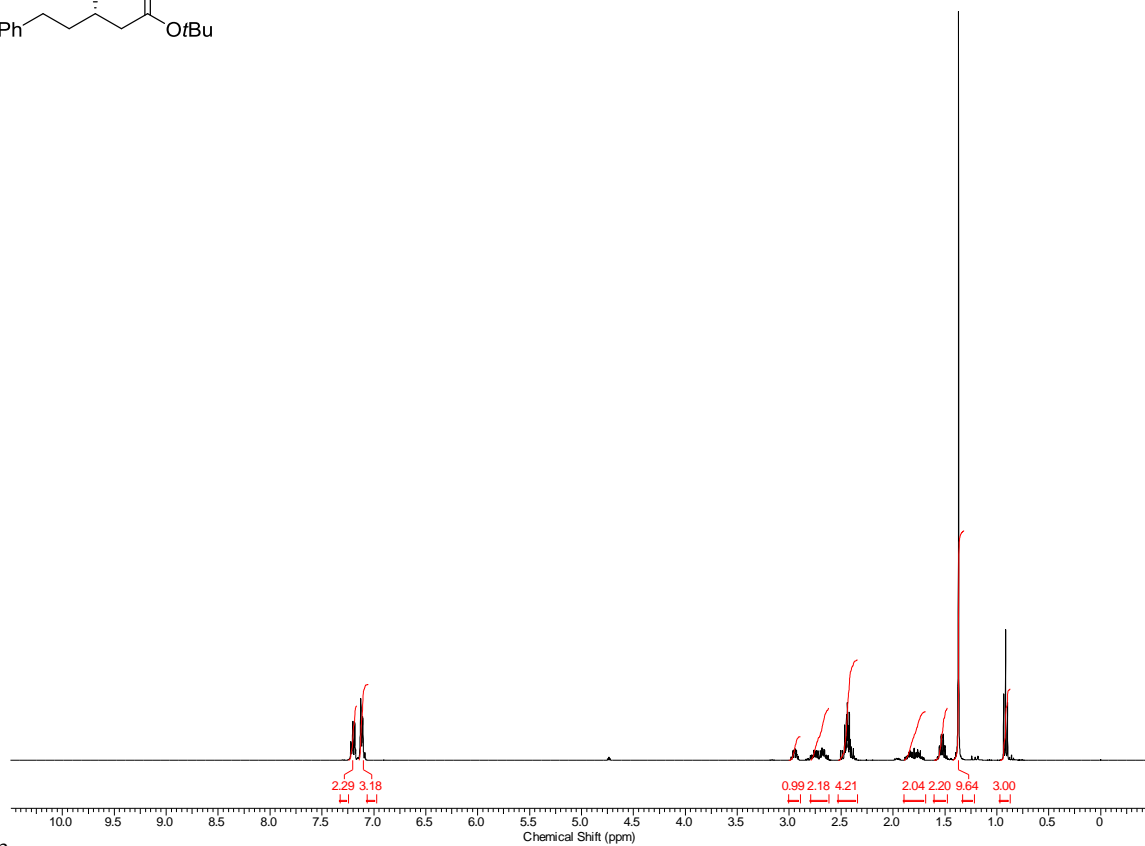

$^{13}\text{C}$  NMR of **4r** (100 MHz,  $\text{CDCl}_3$ )

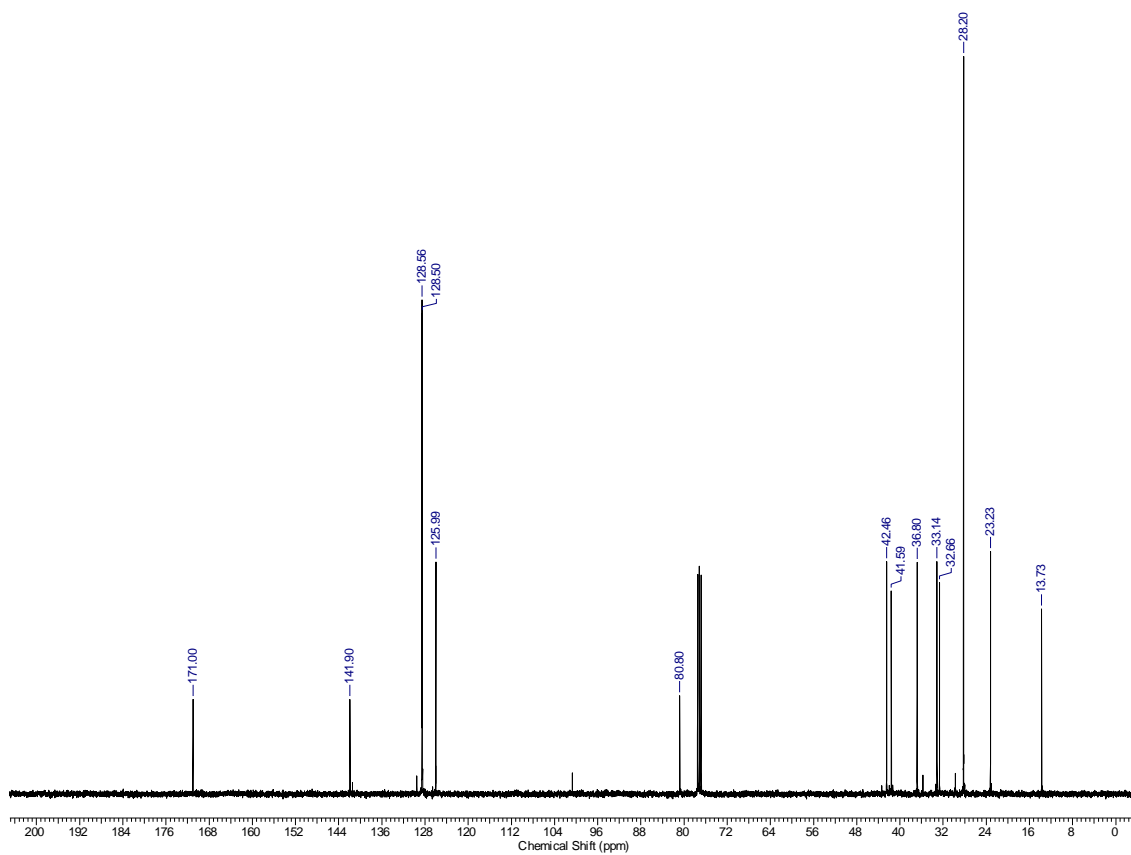

$^1\text{H}$  NMR of **4s** (400 MHz,  $\text{CDCl}_3$ )

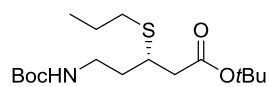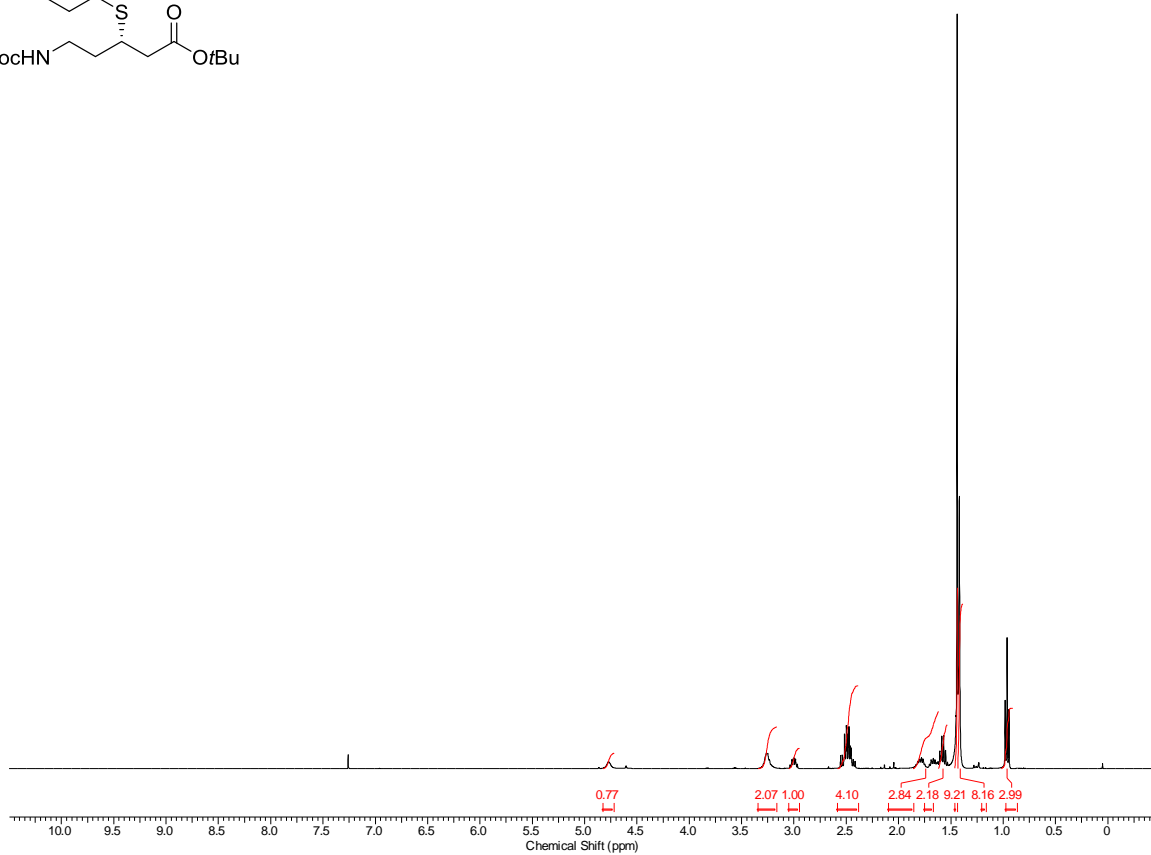

$^{13}\text{C}$  NMR of **4s** (100 MHz,  $\text{CDCl}_3$ )

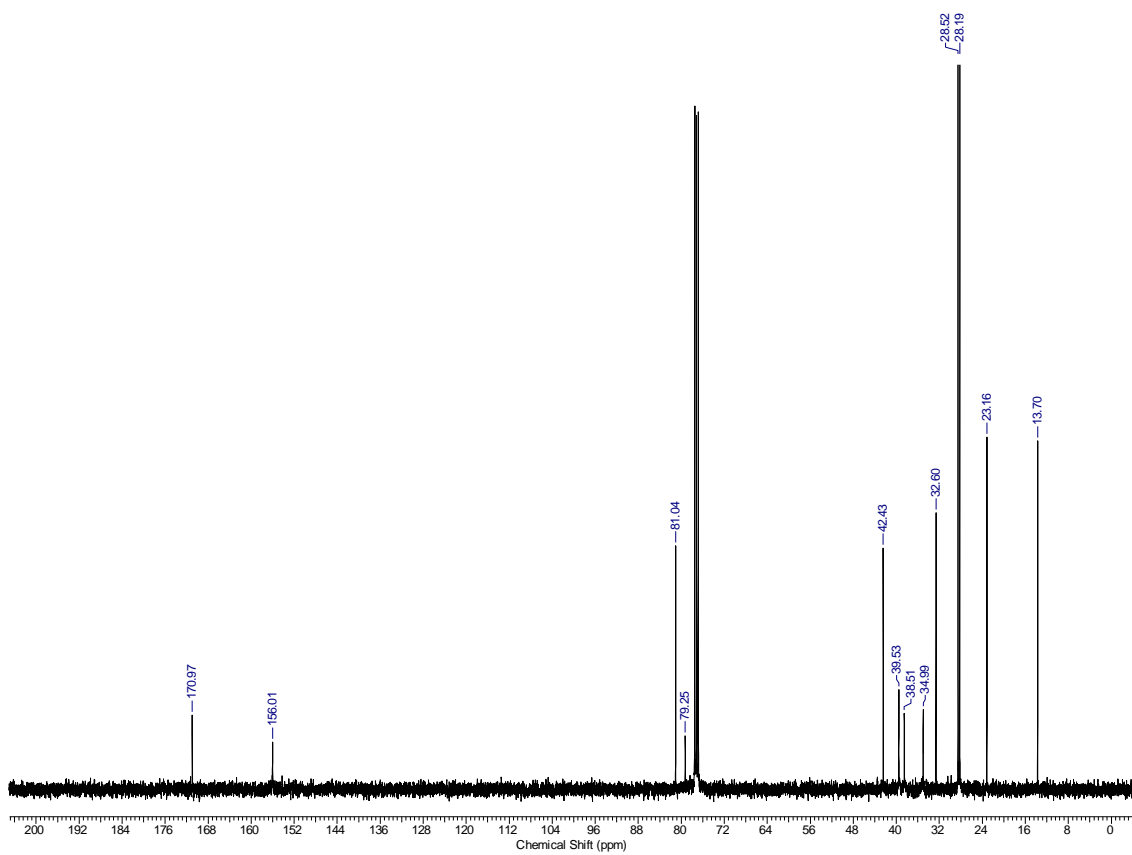

$^1\text{H}$  NMR of **4t** (400 MHz,  $\text{CDCl}_3$ )

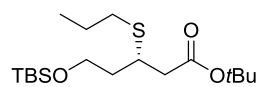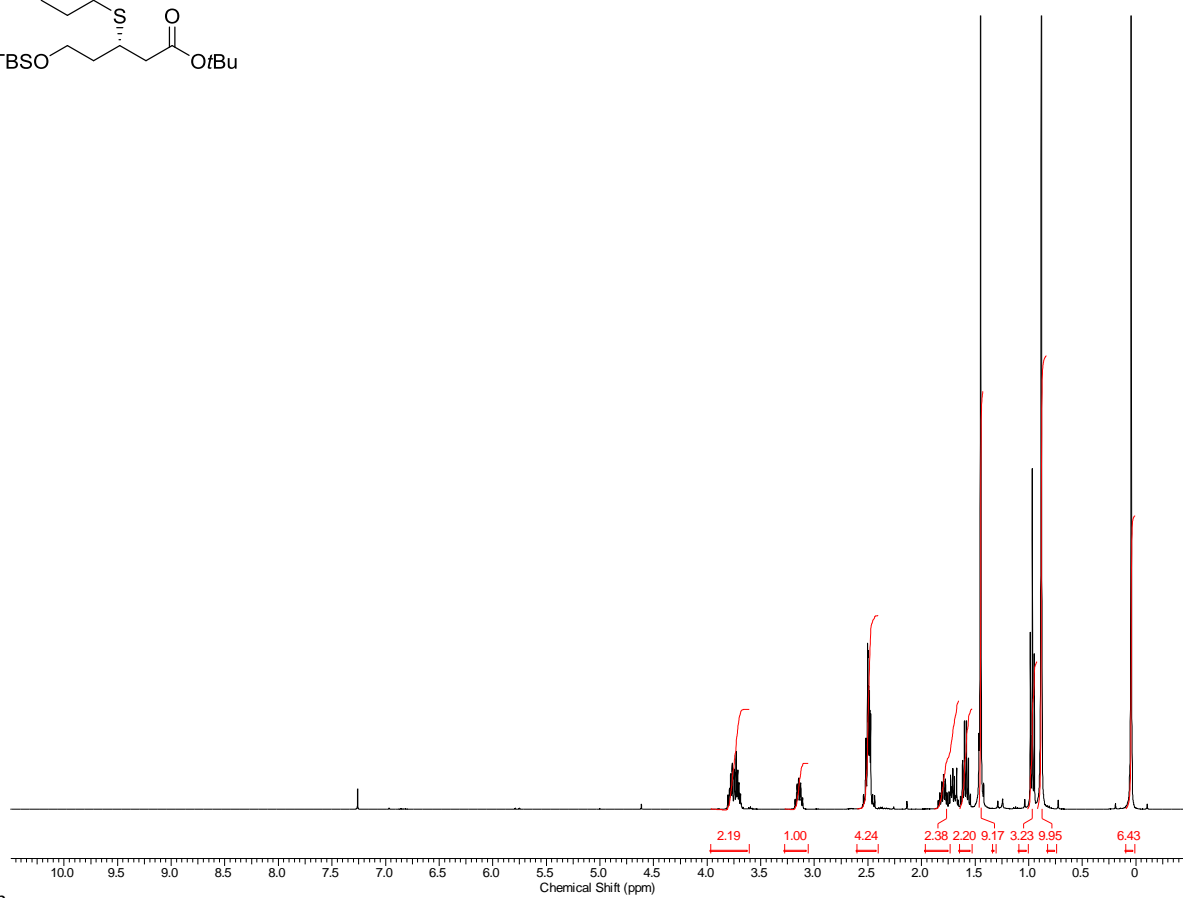

$^{13}\text{C}$  NMR of **4t** (100 MHz,  $\text{CDCl}_3$ )

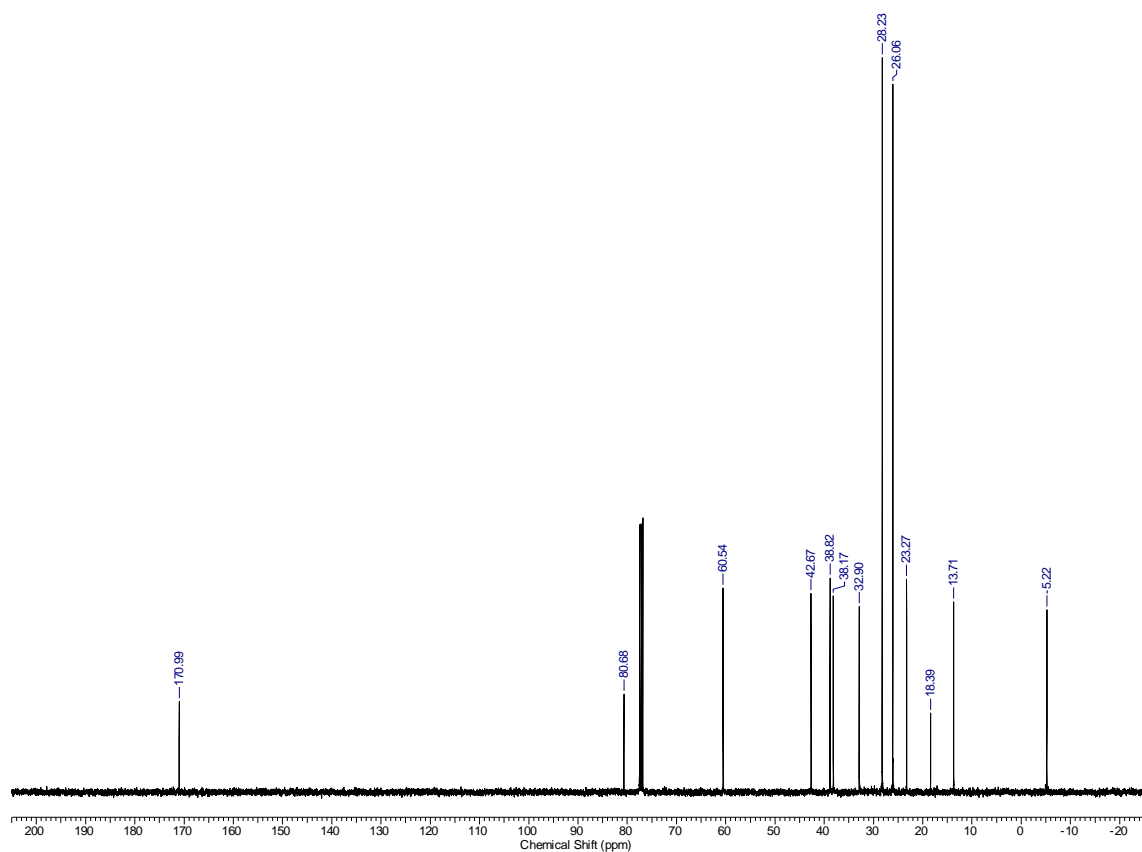

$^1\text{H}$  NMR of **5a** (400 MHz,  $\text{CDCl}_3$ )

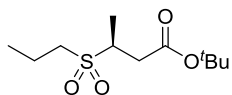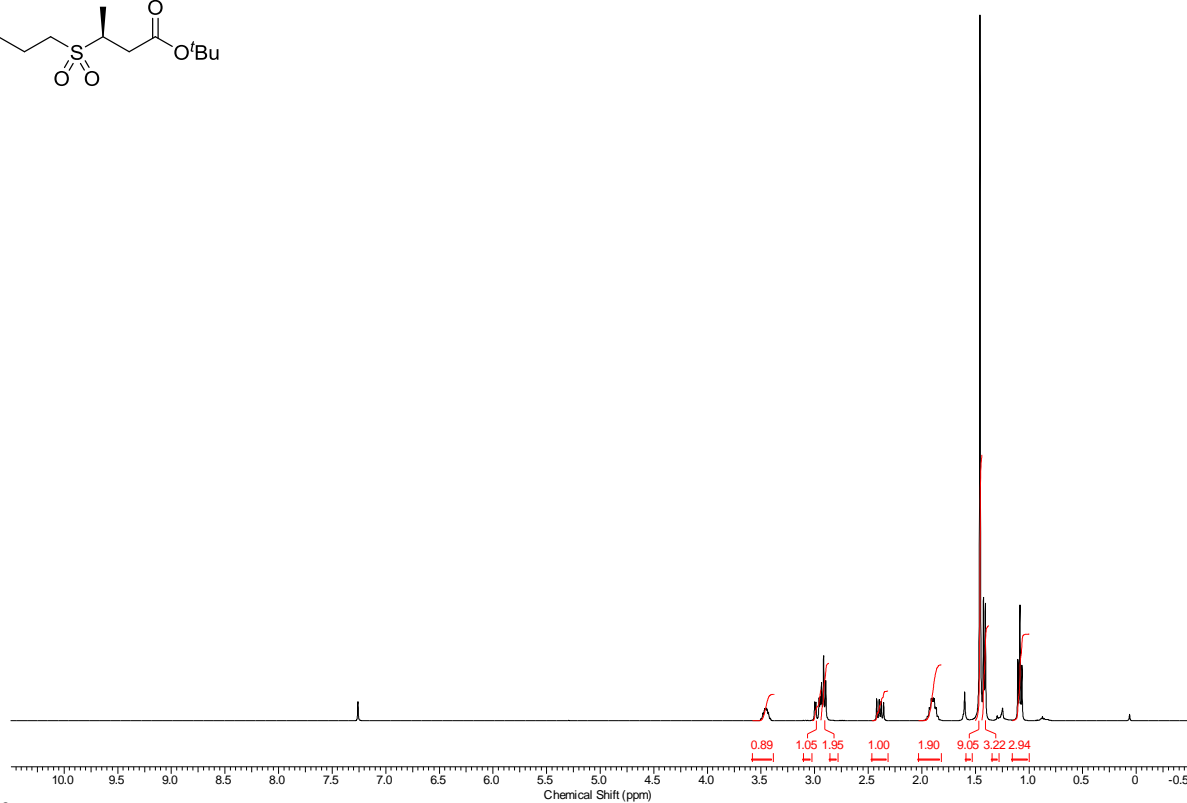

$^{13}\text{C}$  NMR of **5a** (100 MHz,  $\text{CDCl}_3$ )

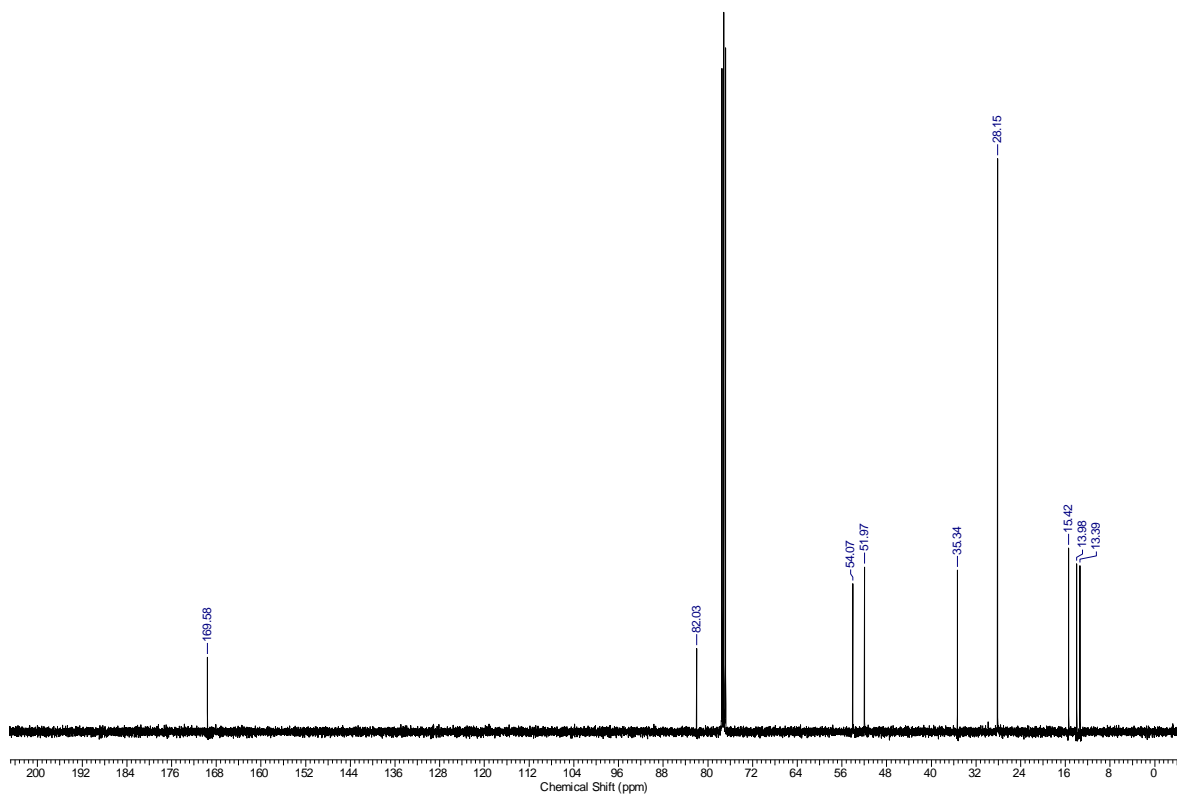



$^1\text{H}$  NMR of **5b** (400 MHz,  $\text{CDCl}_3$ )

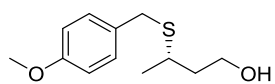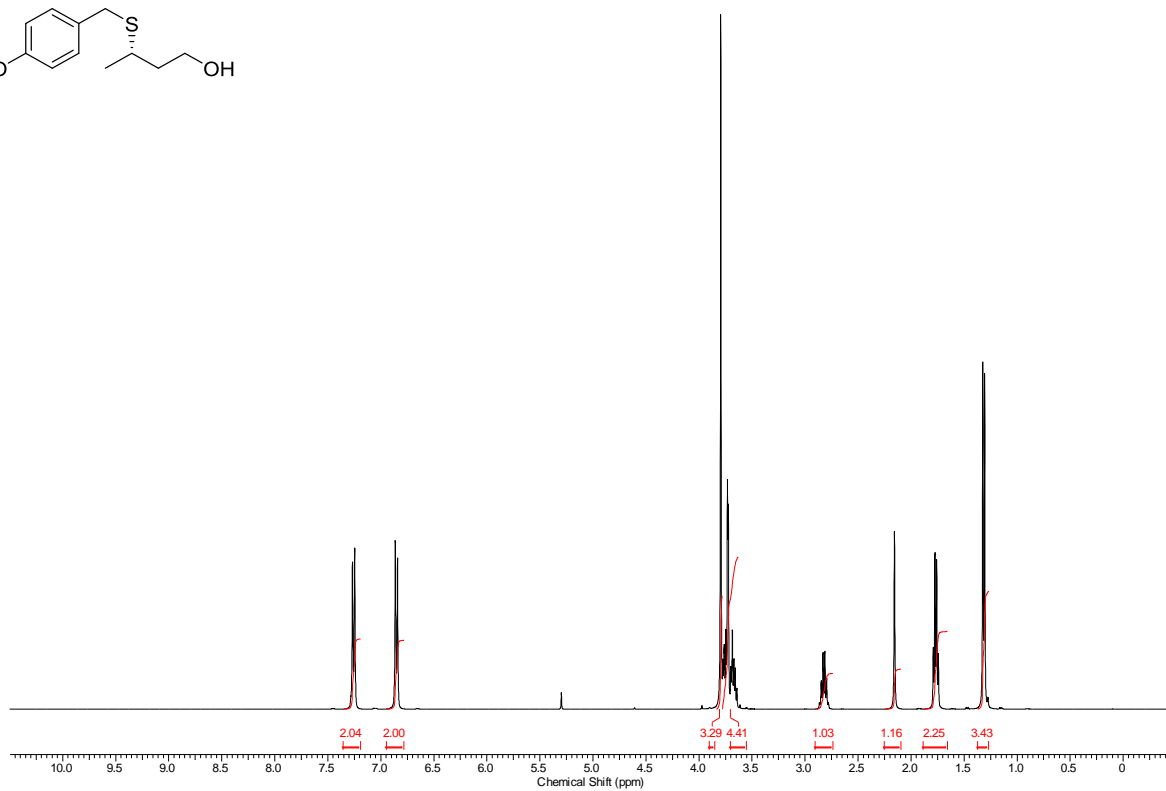

$^{13}\text{C}$  NMR of **5b** (100 MHz,  $\text{CDCl}_3$ )

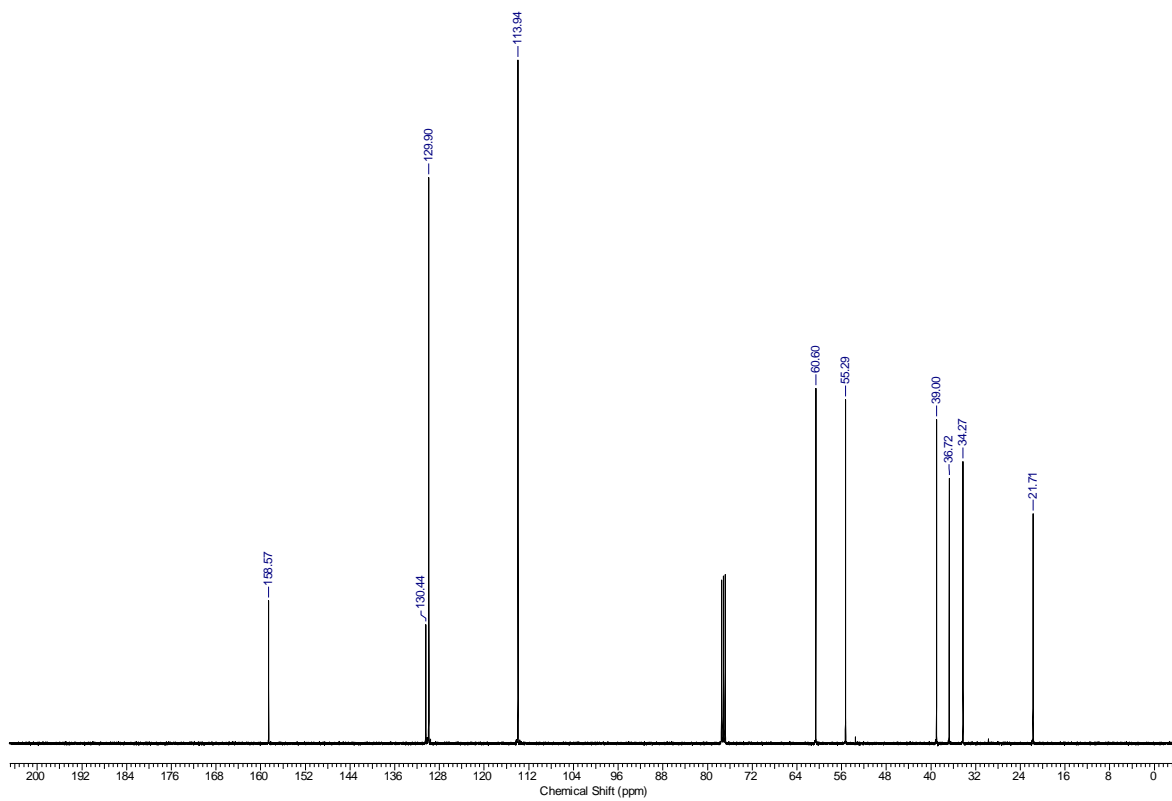

<sup>1</sup>H NMR of **12** (400 MHz, CDCl<sub>3</sub>)

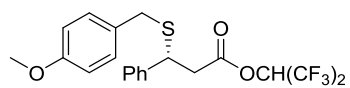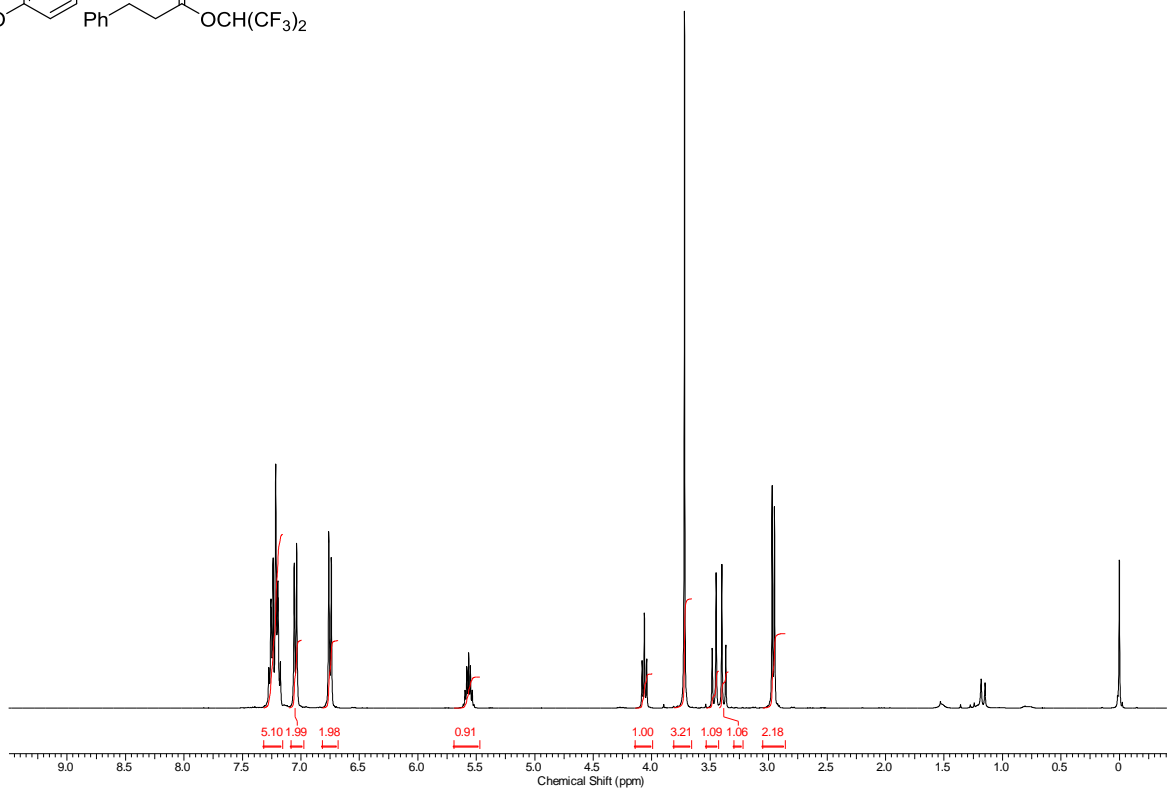

<sup>13</sup>C NMR of **12** (100 MHz, CDCl<sub>3</sub>)

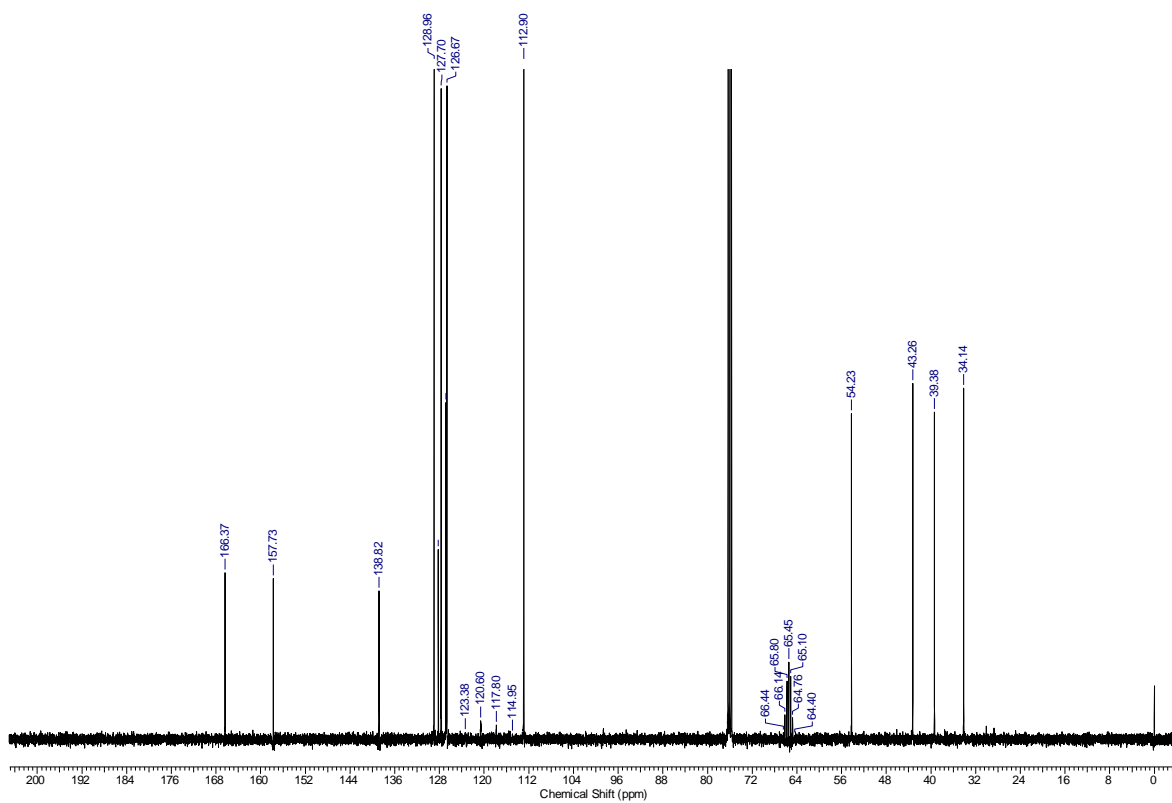

### 3.2 Copies of HPLC and GC spectra

#### HPLC and GC chromatograms of $\beta$ -mercaptoesters 4 (section 1.5)

Methyl (*S*)-3-(propylthio)butanoate **4a**

(Chiralpak IA, hexane/isopropanol = 99.5/0.5, 1 mL/min)

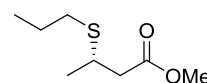

Racemic

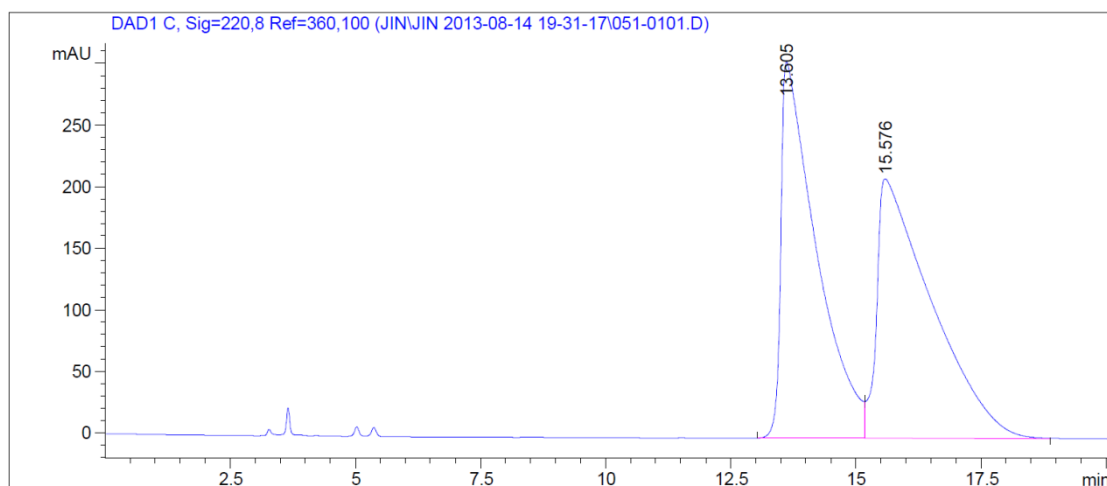

| Peak # | RetTime [min] | Type | Width [min] | Area [mAU*s] | Height [mAU] | Area %  |
|--------|---------------|------|-------------|--------------|--------------|---------|
| 1      | 13.605        | BV   | 0.6940      | 1.49835e4    | 305.58591    | 48.1785 |
| 2      | 15.576        | VB   | 1.0642      | 1.61164e4    | 210.74866    | 51.8215 |

Enantiomerically enriched (81:19 er)

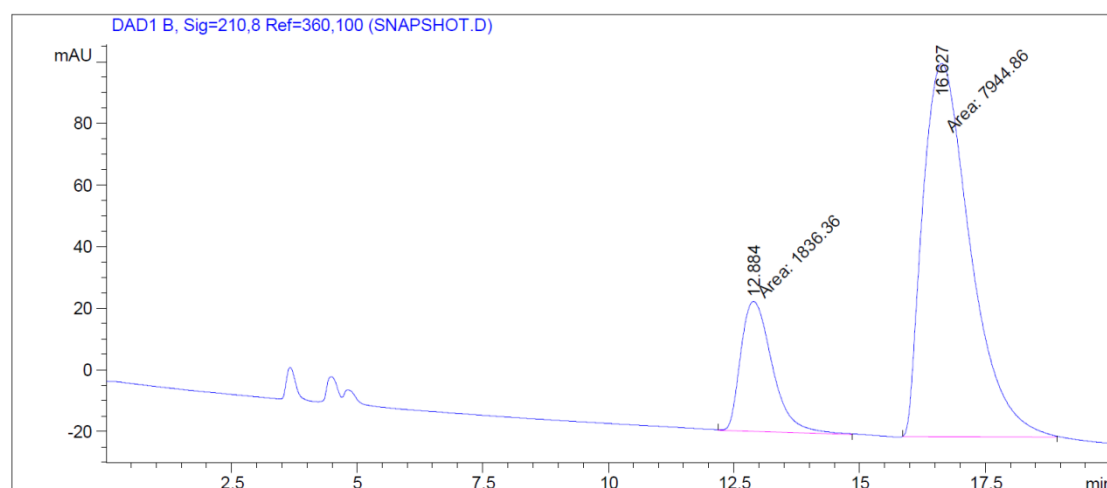

| Peak # | RetTime [min] | Type | Width [min] | Area [mAU*s] | Height [mAU] | Area %  |
|--------|---------------|------|-------------|--------------|--------------|---------|
| 1      | 12.884        | MM   | 0.7267      | 1836.36255   | 42.11743     | 18.7744 |
| 2      | 16.627        | MM   | 1.0934      | 7944.86279   | 121.10498    | 81.2256 |

Ethyl (S)-3-(propylthio)butanoate **4b**

(Chiralpak IA, hexane/isopropanol = 100/0, 1 mL/min)

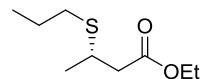

Racemic

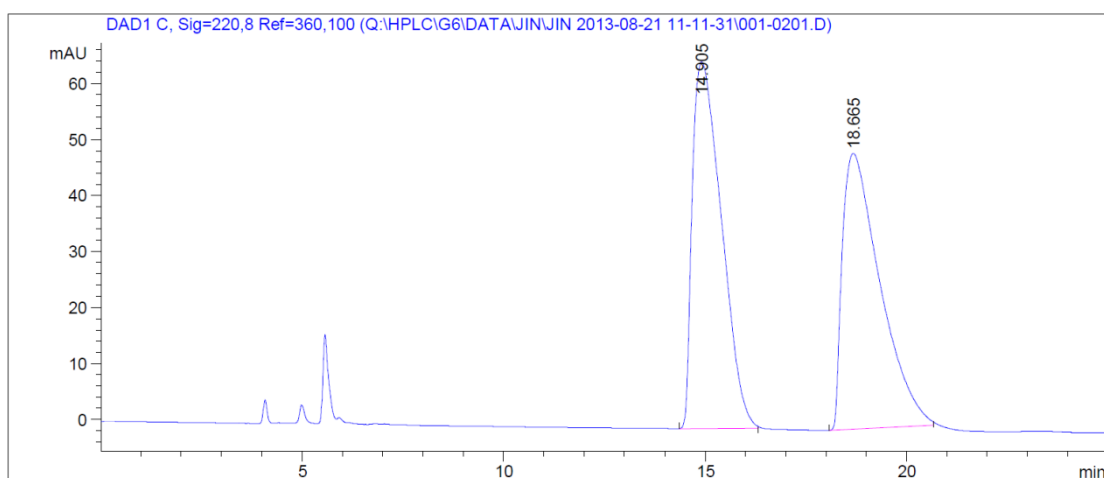

Signal 3: DAD1 C, Sig=220,8 Ref=360,100

| Peak # | RetTime [min] | Type | Width [min] | Area [mAU*s] | Height [mAU] | Area %  |
|--------|---------------|------|-------------|--------------|--------------|---------|
| 1      | 14.905        | BB   | 0.7777      | 3288.40430   | 65.50745     | 50.6757 |
| 2      | 18.665        | BB   | 0.9565      | 3200.70508   | 49.23289     | 49.3243 |

Enantiomerically enriched (84:16 er)

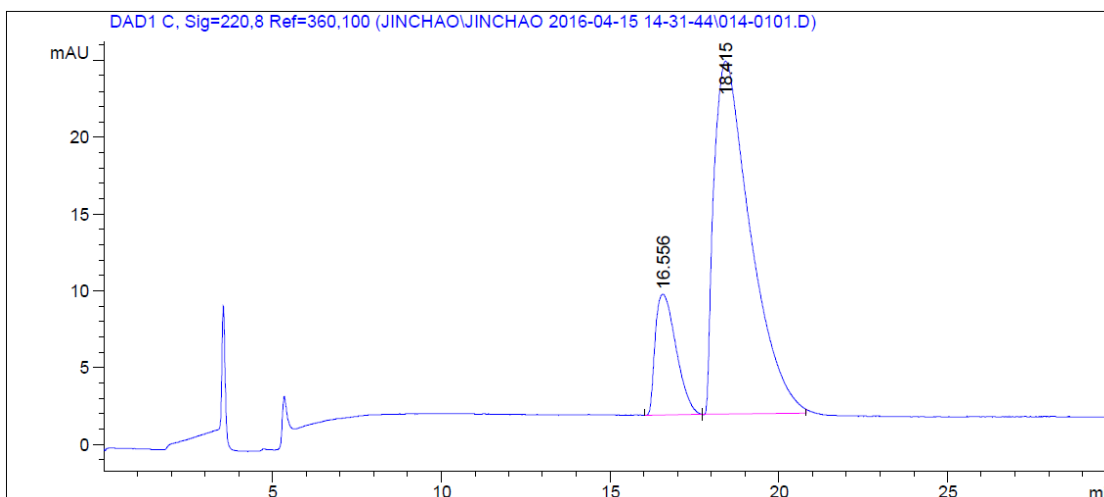

| Peak # | RetTime [min] | Type | Width [min] | Area [mAU*s] | Height [mAU] | Area %  |
|--------|---------------|------|-------------|--------------|--------------|---------|
| 1      | 16.556        | BB   | 0.6734      | 335.96121    | 7.84784      | 16.3077 |
| 2      | 18.415        | BB   | 1.1274      | 1724.17236   | 22.97809     | 83.6923 |

Isopropyl (S)-3-(propylthio)butanoate **4c**

(Chiralpak AD-H, hexane/isopropanol = 99/1, 1 mL/min)

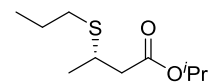

Racemic

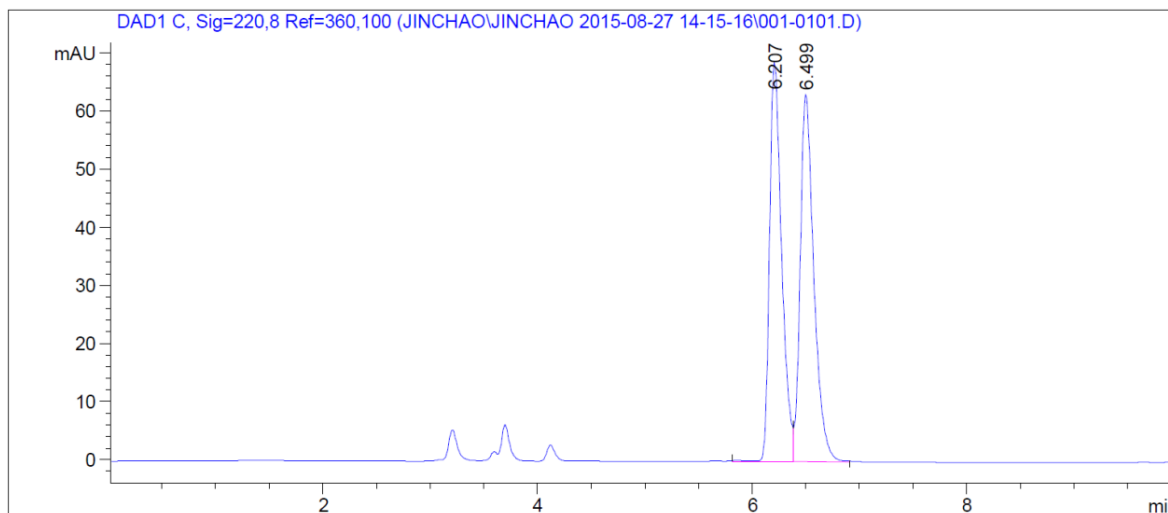

| Peak # | RetTime [min] | Type | Width [min] | Area [mAU*s] | Height [mAU] | Area %  |
|--------|---------------|------|-------------|--------------|--------------|---------|
| 1      | 6.207         | BV   | 0.1192      | 537.12067    | 68.69326     | 48.9867 |
| 2      | 6.499         | VB   | 0.1334      | 559.34070    | 63.08997     | 51.0133 |

Enantiomerically enriched (85:15 er)

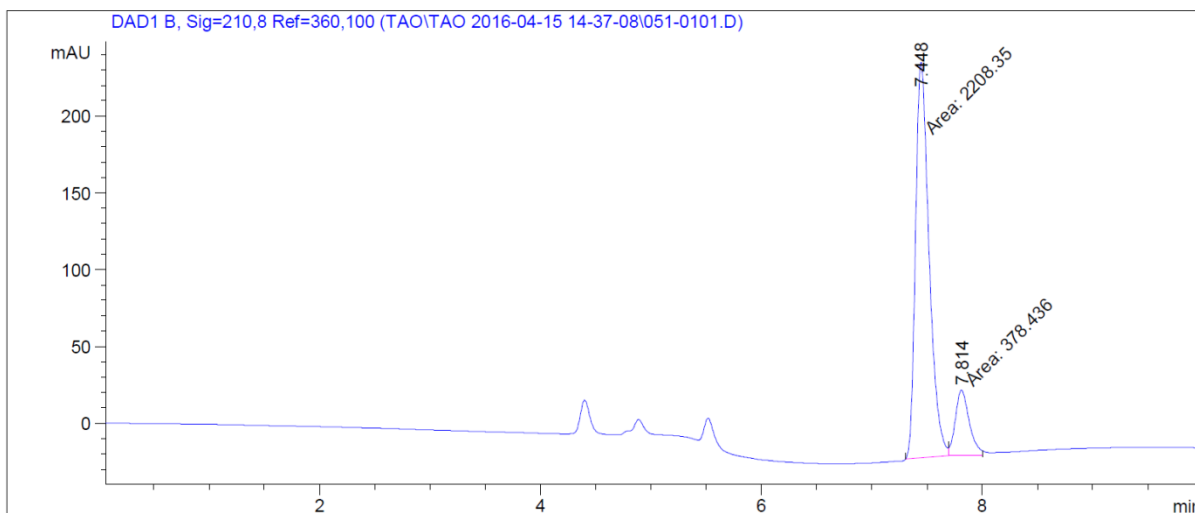

| Peak # | RetTime [min] | Type | Width [min] | Area [mAU*s] | Height [mAU] | Area %  |
|--------|---------------|------|-------------|--------------|--------------|---------|
| 1      | 7.448         | MM   | 0.1426      | 2208.35254   | 258.15961    | 85.3704 |
| 2      | 7.814         | MM   | 0.1476      | 378.43585    | 42.73730     | 14.6296 |

Benzyl (S)-3-(propylthio)butanoate **4d**

(Chiralpak AD-H, hexane/isopropanol = 99/1, 1 mL/min)

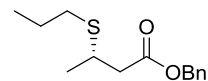

Racemic

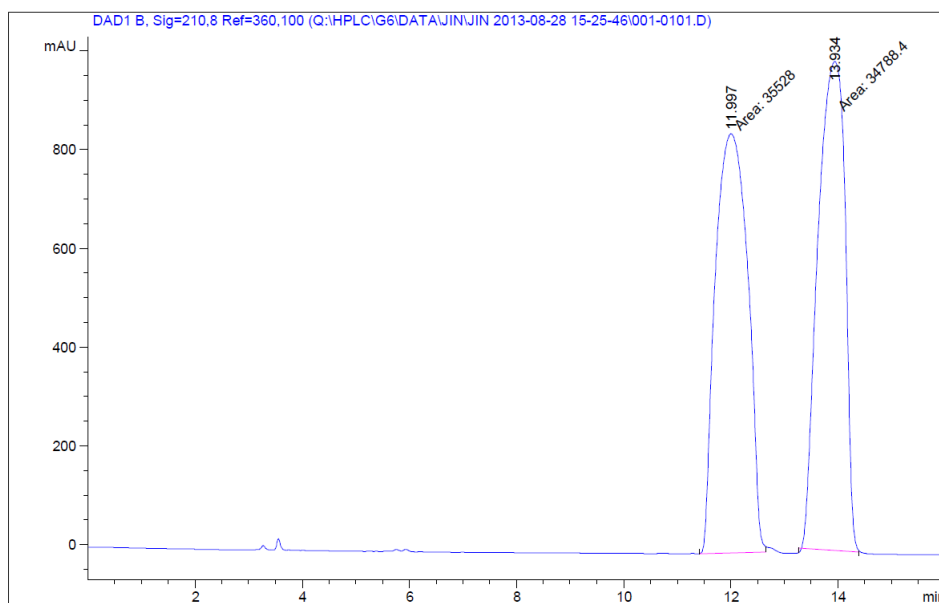

| Peak # | RetTime [min] | Type | Width [min] | Area [mAU*s] | Height [mAU] | Area %  |
|--------|---------------|------|-------------|--------------|--------------|---------|
| 1      | 11.997        | MM   | 0.6978      | 3.55280e4    | 848.51453    | 50.5259 |
| 2      | 13.934        | MM   | 0.5857      | 3.47884e4    | 990.01239    | 49.4741 |

Enantiomerically enriched (81:19 er)

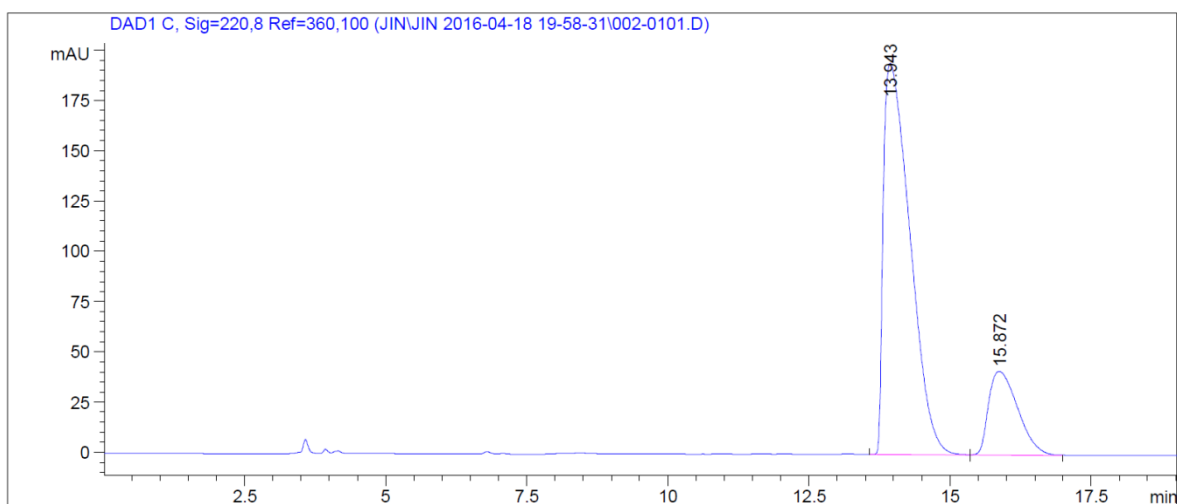

| Peak # | RetTime [min] | Type | Width [min] | Area [mAU*s] | Height [mAU] | Area %  |
|--------|---------------|------|-------------|--------------|--------------|---------|
| 1      | 13.943        | BB   | 0.5321      | 6380.69287   | 194.81694    | 81.0120 |
| 2      | 15.872        | BB   | 0.5787      | 1495.53528   | 41.66831     | 18.9880 |

*tert*-Butyl (*S*)-3-(propylthio)butanoate **4e**

(Chiralpak IA, hexane/isopropanol = 100/0, 1 mL/min)

Racemic

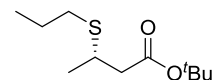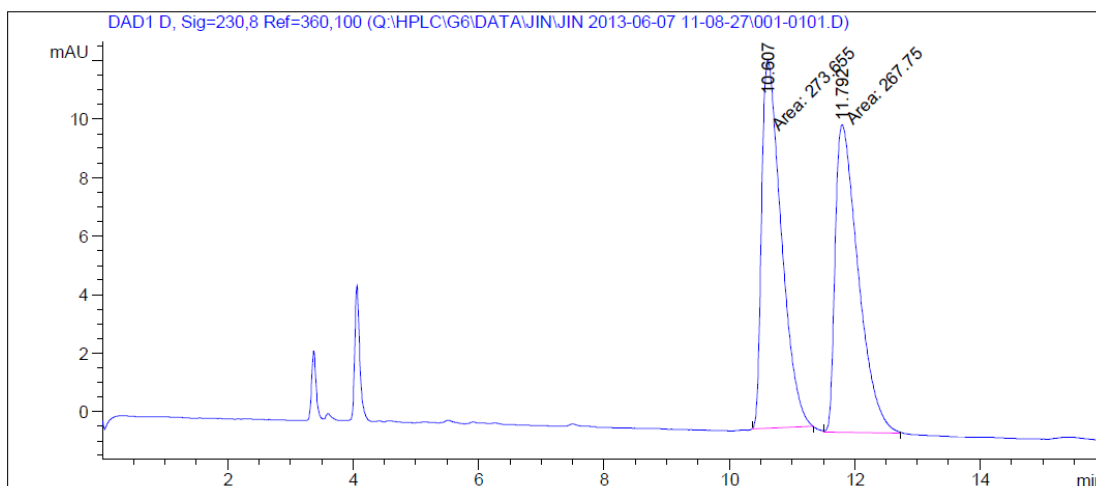

Signal 4: DAD1 D, Sig=230,8 Ref=360,100

| Peak # | RetTime [min] | Type | Width [min] | Area [mAU*s] | Height [mAU] | Area %  |
|--------|---------------|------|-------------|--------------|--------------|---------|
| 1      | 10.607        | MM   | 0.3626      | 273.65527    | 12.57780     | 50.5453 |
| 2      | 11.792        | MM   | 0.4243      | 267.75049    | 10.51638     | 49.4547 |

Enantiomerically enriched (97:3 er)

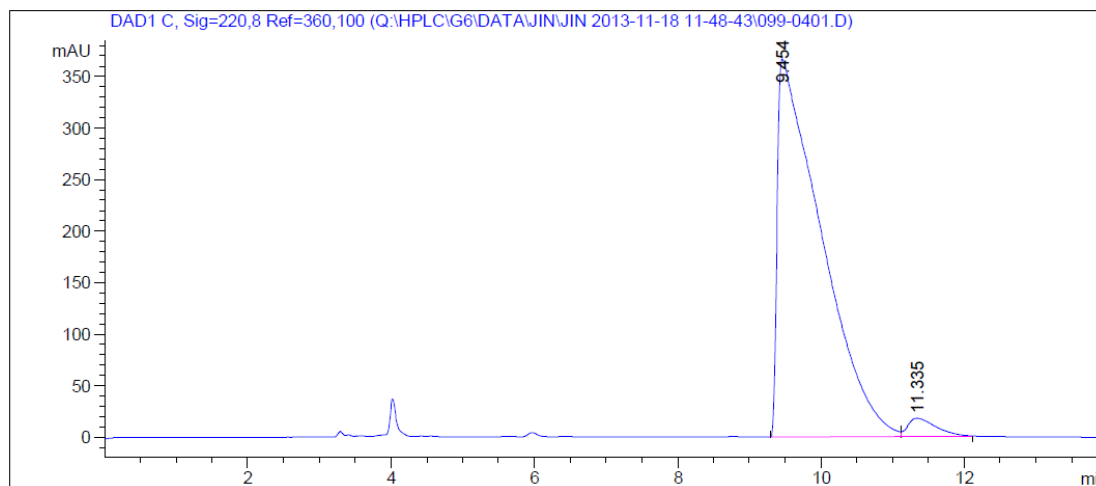

Signal 3: DAD1 C, Sig=220,8 Ref=360,100

| Peak # | RetTime [min] | Type | Width [min] | Area [mAU*s] | Height [mAU] | Area %  |
|--------|---------------|------|-------------|--------------|--------------|---------|
| 1      | 9.454         | BV   | 0.5481      | 1.55955e4    | 366.78867    | 96.9281 |
| 2      | 11.335        | VB   | 0.4091      | 494.25604    | 17.84553     | 3.0719  |

*tert*-Butyl (*S*)-3-(pentylthio)butanoate **4f**

(Chiralpak IA, hexane/isopropanol = 100/0, 1 mL/min)

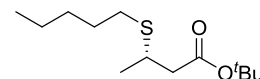

Racemic

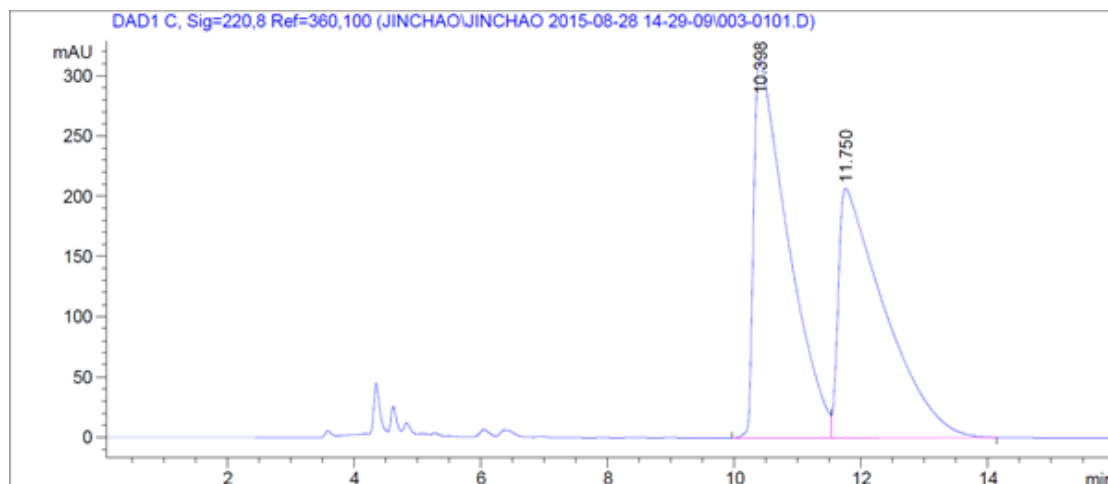

Signal 3: DAD1 C, Sig=220,8 Ref=360,100

| Peak # | RetTime [min] | Type | Width [min] | Area [mAU*s] | Height [mAU] | Area %  |
|--------|---------------|------|-------------|--------------|--------------|---------|
| 1      | 10.398        | BV   | 0.5348      | 1.17456e4    | 313.73355    | 52.7505 |
| 2      | 11.750        | VB   | 0.7025      | 1.05207e4    | 207.14561    | 47.2495 |

Enantiomerically enriched (95:5 er)

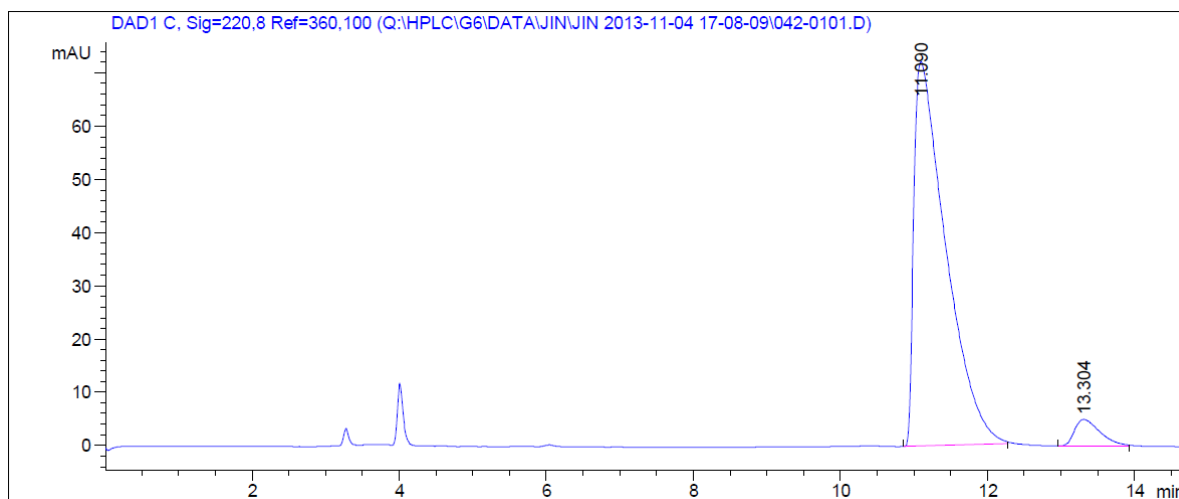

Signal 3: DAD1 C, Sig=220,8 Ref=360,100

| Peak # | RetTime [min] | Type | Width [min] | Area [mAU*s] | Height [mAU] | Area %  |
|--------|---------------|------|-------------|--------------|--------------|---------|
| 1      | 11.090        | BB   | 0.4384      | 2180.99365   | 72.20281     | 94.8412 |
| 2      | 13.304        | BB   | 0.3585      | 118.63420    | 4.96983      | 5.1588  |



*tert*-Butyl (*S*)-3-(isopropylthio)butanoate **4g**

(Supelco  $\beta$ -dex<sup>TM</sup> 325)

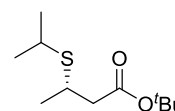

Racemic

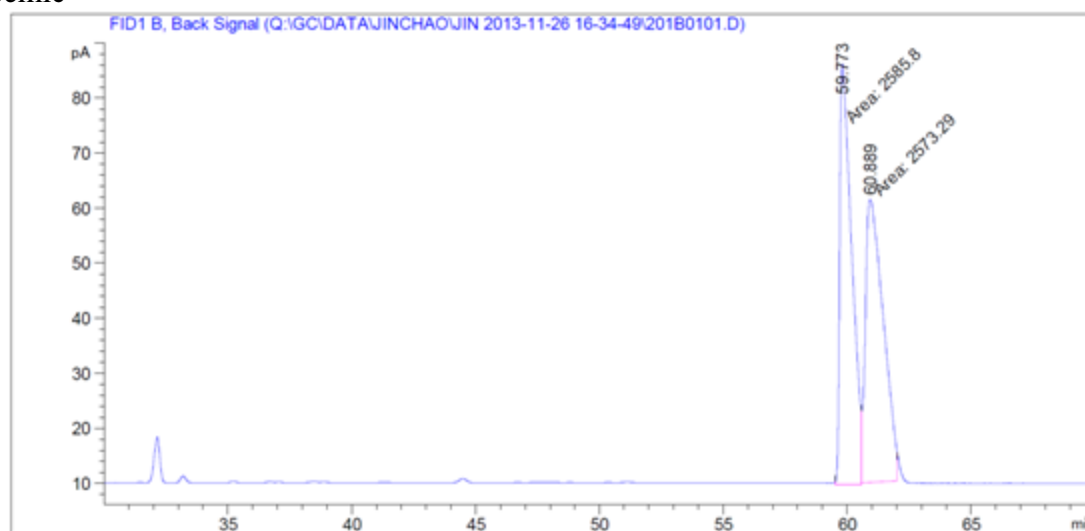

Signal 1: FID1 B, Back Signal

| Peak # | RetTime [min] | Type | Width [min] | Area [pA*s] | Height [pA] | Area %   |
|--------|---------------|------|-------------|-------------|-------------|----------|
| 1      | 59.773        | MM   | 0.5644      | 2585.79736  | 76.35378    | 50.12123 |
| 2      | 60.889        | MM   | 0.8346      | 2573.28882  | 51.38985    | 49.87877 |

Enantiomerically enriched (96:4 er)

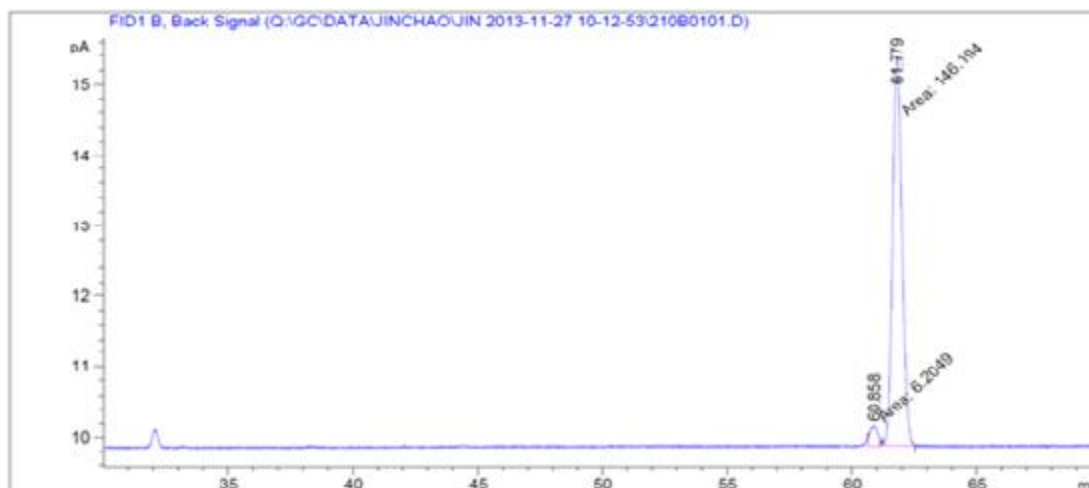

Signal 1: FID1 B, Back Signal

| Peak # | RetTime [min] | Type | Width [min] | Area [pA*s] | Height [pA] | Area %   |
|--------|---------------|------|-------------|-------------|-------------|----------|
| 1      | 60.858        | MM   | 0.4049      | 6.79030     | 2.79475e-1  | 4.43855  |
| 2      | 61.779        | MM   | 0.4430      | 146.19440   | 5.50011     | 95.56145 |

*tert*-Butyl (*S*)-3-(isopentylthio)butanoate **4h**

(Chiralpak IA, hexane/isopropanol = 100/0, 1 mL/min)

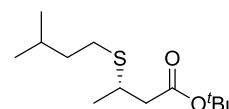

Racemic

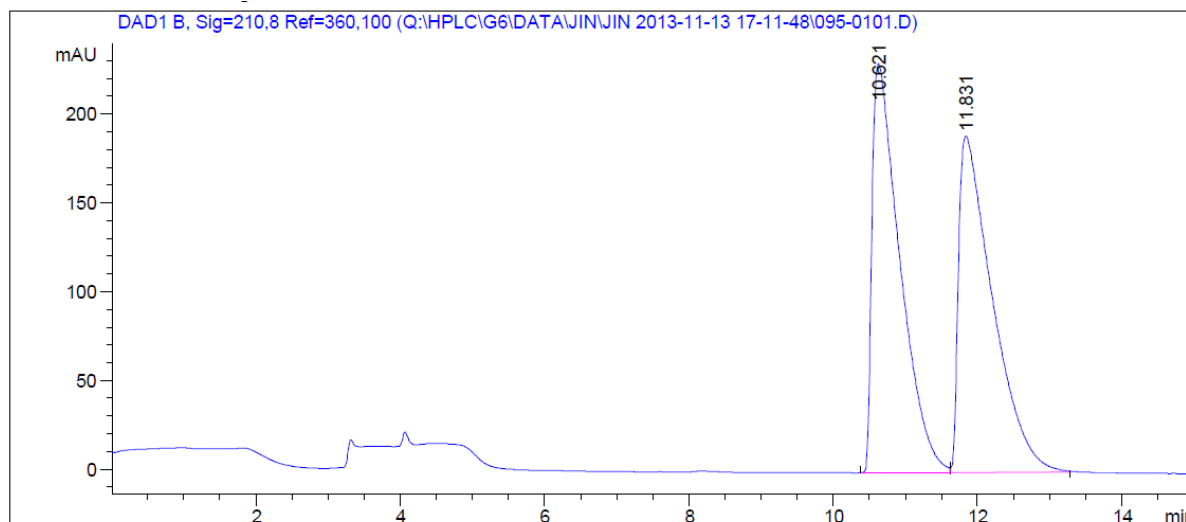

Signal 2: DAD1 B, Sig=210,8 Ref=360,100

| Peak # | RetTime [min] | Type | Width [min] | Area [mAU*s] | Height [mAU] | Area %  |
|--------|---------------|------|-------------|--------------|--------------|---------|
| 1      | 10.621        | BV   | 0.3913      | 6184.95654   | 230.33221    | 49.9945 |
| 2      | 11.831        | VB   | 0.4728      | 6186.31348   | 189.54134    | 50.0055 |

Enantiomerically enriched (95:5 er)

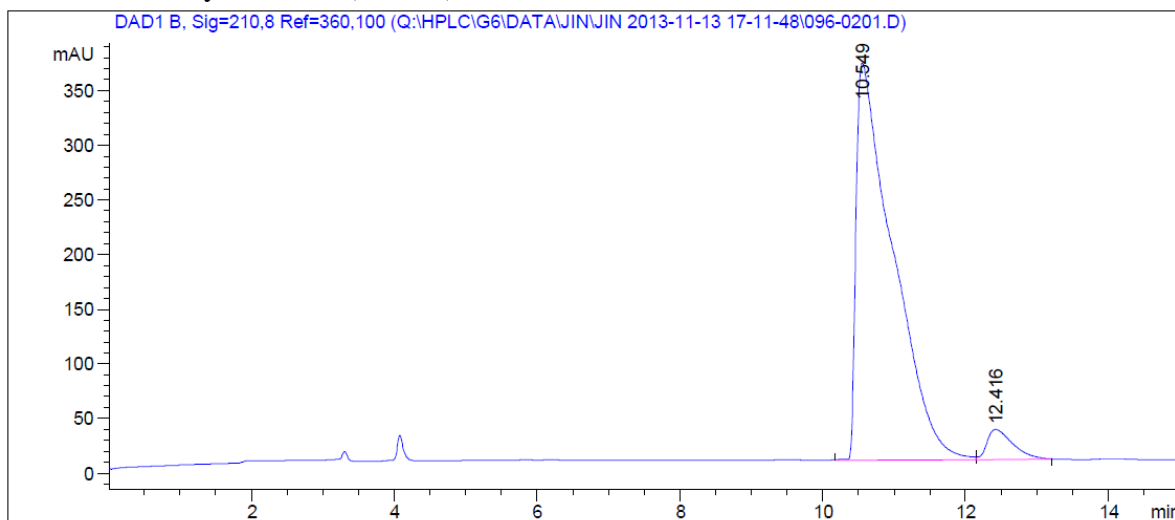

Signal 2: DAD1 B, Sig=210,8 Ref=360,100

| Peak # | RetTime [min] | Type | Width [min] | Area [mAU*s] | Height [mAU] | Area %  |
|--------|---------------|------|-------------|--------------|--------------|---------|
| 1      | 10.549        | BB   | 0.4910      | 1.29721e4    | 362.90451    | 94.9286 |
| 2      | 12.416        | BB   | 0.3782      | 693.01221    | 27.47880     | 5.0714  |

*tert*-Butyl (*S*)-3-(decylthio)butanoate **4i**

(Supelco  $\beta$ -dex<sup>TM</sup> 325)

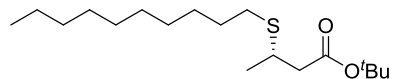

Racemic

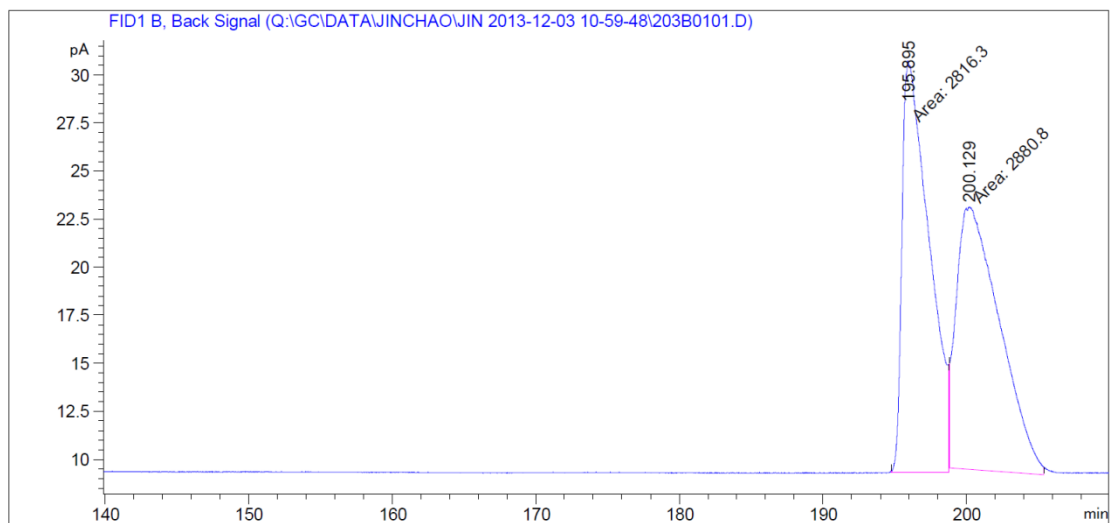

| Peak # | RetTime [min] | Type | Width [min] | Area [pA*s] | Height [pA] | Area %   |
|--------|---------------|------|-------------|-------------|-------------|----------|
| 1      | 195.895       | MM   | 2.1914      | 2816.29932  | 21.41913    | 49.43394 |
| 2      | 200.129       | MM   | 3.5177      | 2880.79785  | 13.64887    | 50.56606 |

Enantiomerically enriched (95:5)

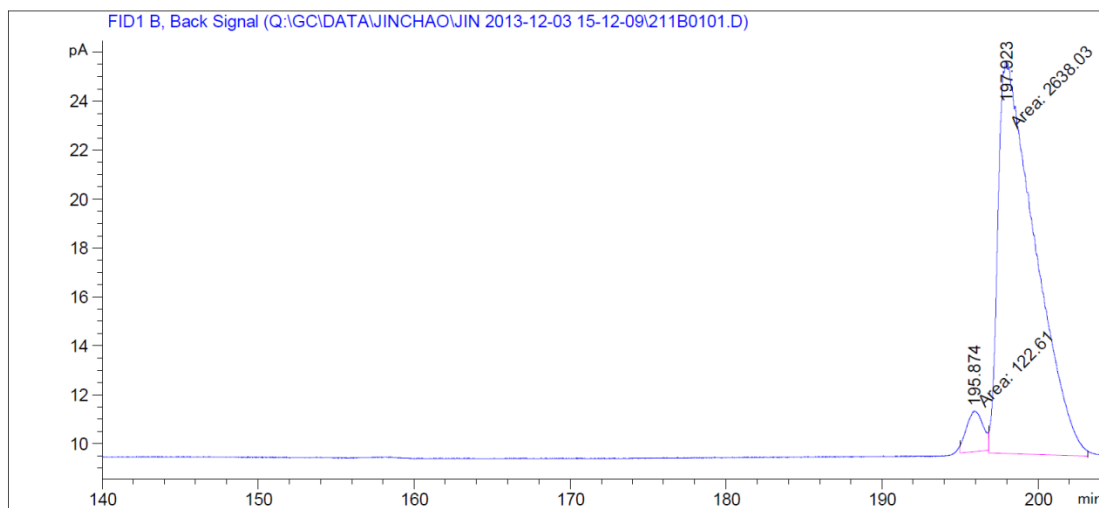

Signal 1: FID1 B, Back Signal

| Peak # | RetTime [min] | Type | Width [min] | Area [pA*s] | Height [pA] | Area %   |
|--------|---------------|------|-------------|-------------|-------------|----------|
| 1      | 195.874       | MM   | 1.2012      | 130.79546   | 1.81475     | 4.69734  |
| 2      | 197.923       | MM   | 2.7481      | 2653.66333  | 16.09390    | 95.30266 |

*tert*-Butyl (*S*)-3-(cyclohexylthio)butanoate **4j**

(Chiralpak IA, hexane/isopropanol = 100/0, 0.5 mL/min)

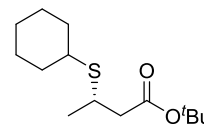

Racemic

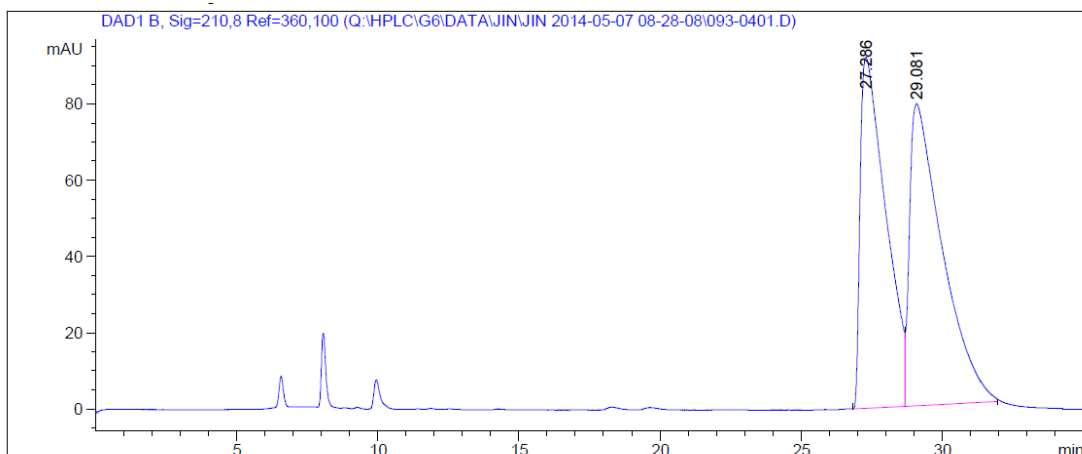

Signal 2: DAD1 B, Sig=210,8 Ref=360,100

| Peak # | RetTime [min] | Type | Width [min] | Area [mAU*s] | Height [mAU] | Area %  |
|--------|---------------|------|-------------|--------------|--------------|---------|
| 1      | 27.286        | BV   | 0.8855      | 5740.49951   | 92.05278     | 47.2667 |
| 2      | 29.081        | VB   | 1.0967      | 6404.40234   | 79.09560     | 52.7333 |

Totals : 1.21449e4 171.14838

Enantiomerically enriched (95:5 er)

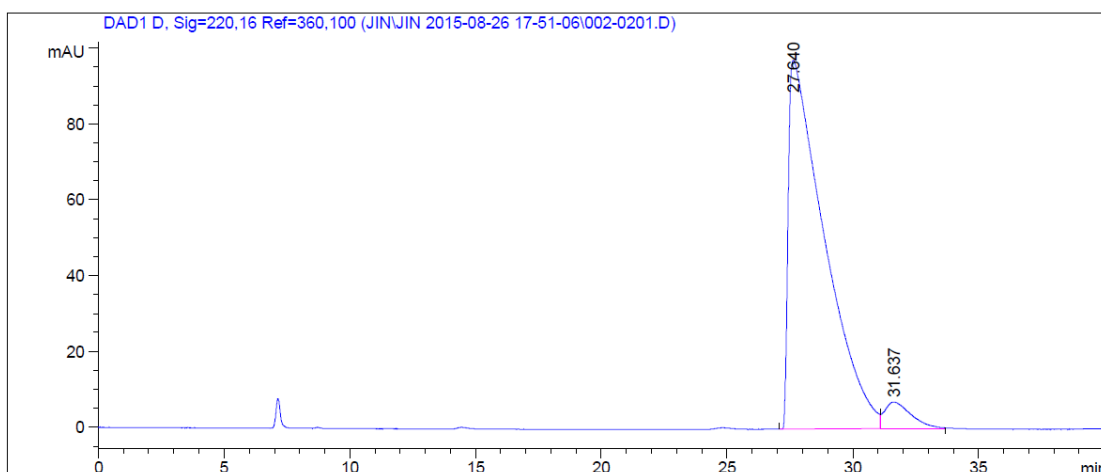

Signal 4: DAD1 D, Sig=220,16 Ref=360,100

| Peak # | RetTime [min] | Type | Width [min] | Area [mAU*s] | Height [mAU] | Area %  |
|--------|---------------|------|-------------|--------------|--------------|---------|
| 1      | 27.640        | BV   | 1.3216      | 9691.12891   | 97.32992     | 94.9290 |
| 2      | 31.637        | VB   | 0.9968      | 517.68457    | 7.01612      | 5.0710  |

*tert*-Butyl (*S*)-3-(cyclopentylthio)butanoate **4k**

(Chiralpak IA, hexane/isopropanol = 100/0, 1.0 mL/min)

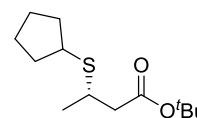

Racemic

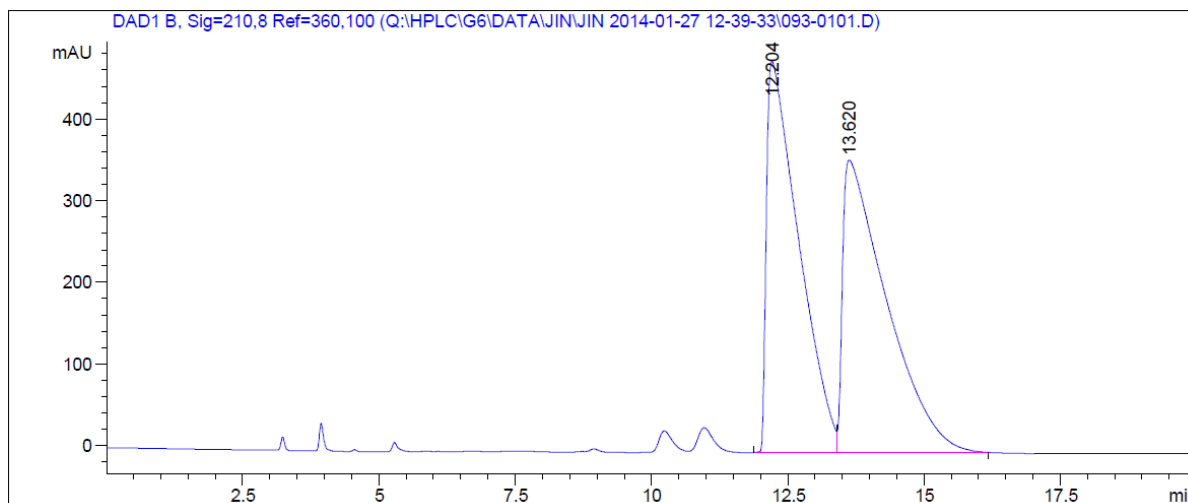

Signal 2: DAD1 B, Sig=210,8 Ref=360,100

| Peak # | RetTime [min] | Type | Width [min] | Area [mAU*s] | Height [mAU] | Area %  |
|--------|---------------|------|-------------|--------------|--------------|---------|
| 1      | 12.204        | BV   | 0.5959      | 1.96327e4    | 479.27637    | 49.3124 |
| 2      | 13.620        | VB   | 0.7928      | 2.01802e4    | 358.46552    | 50.6876 |

Enantiomerically enriched (96:4 er)

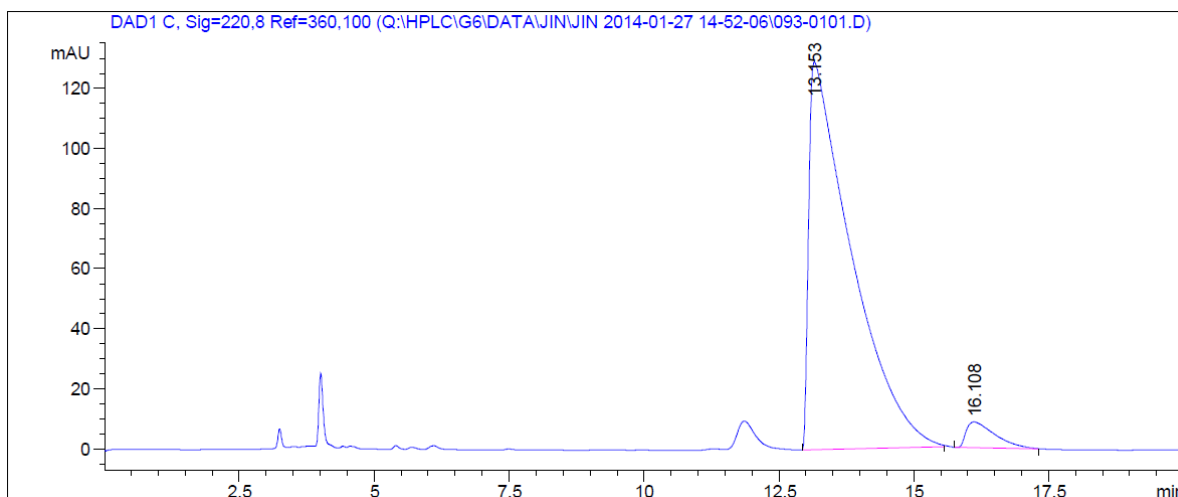

Signal 3: DAD1 C, Sig=220,8 Ref=360,100

| Peak # | RetTime [min] | Type | Width [min] | Area [mAU*s] | Height [mAU] | Area %  |
|--------|---------------|------|-------------|--------------|--------------|---------|
| 1      | 13.153        | BB   | 0.7463      | 7085.36377   | 129.10587    | 95.6882 |
| 2      | 16.108        | BB   | 0.5462      | 319.27481    | 8.53992      | 4.3118  |

*tert*-Butyl (*S*)-3-(phenethylthio)butanoate **4I**

(Chiralpak IA, hexane/isopropanol = 100/0, 1.0 mL/min)

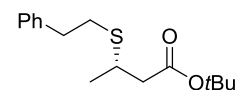

Racemic

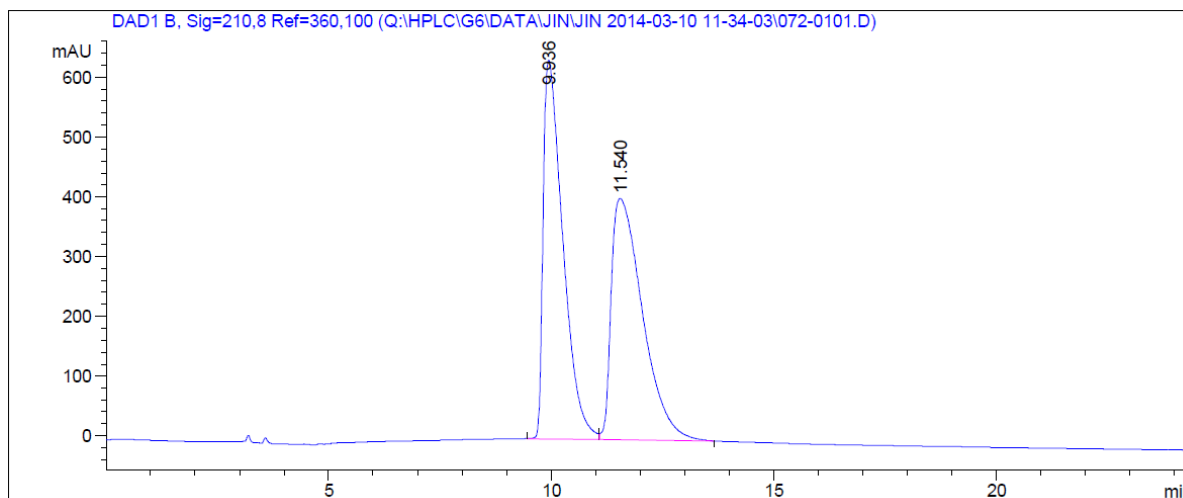

Signal 2: DAD1 B, Sig=210,8 Ref=360,100

| Peak # | RetTime [min] | Type | Width [min] | Area [mAU*s] | Height [mAU] | Area %  |
|--------|---------------|------|-------------|--------------|--------------|---------|
| 1      | 9.936         | BV   | 0.4662      | 1.95530e4    | 633.33875    | 49.7235 |
| 2      | 11.540        | VB   | 0.7613      | 1.97704e4    | 403.75366    | 50.2765 |

Enantiomerically enriched (94:6 er)

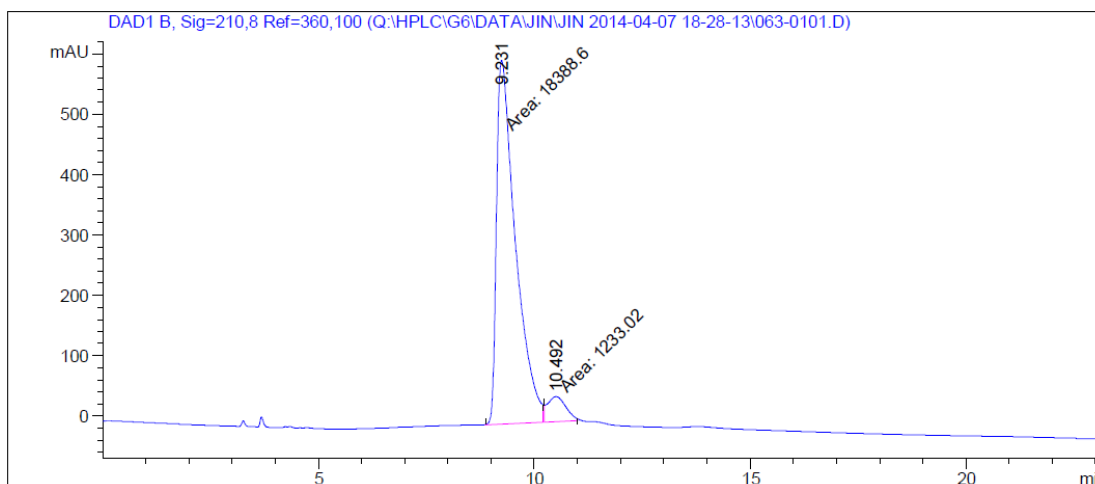

Signal 2: DAD1 B, Sig=210,8 Ref=360,100

| Peak # | RetTime [min] | Type | Width [min] | Area [mAU*s] | Height [mAU] | Area %  |
|--------|---------------|------|-------------|--------------|--------------|---------|
| 1      | 9.231         | MM   | 0.5083      | 1.83886e4    | 602.98889    | 93.7160 |
| 2      | 10.492        | MM   | 0.4930      | 1233.02429   | 41.68432     | 6.2840  |

*tert*-Butyl (*S*)-3-((4-methoxybenzyl)thio)butanoate **4m**

(Chiralpak AS-H, hexane/isopropanol = 99/1, 1.0 mL/min)

Racemic

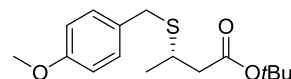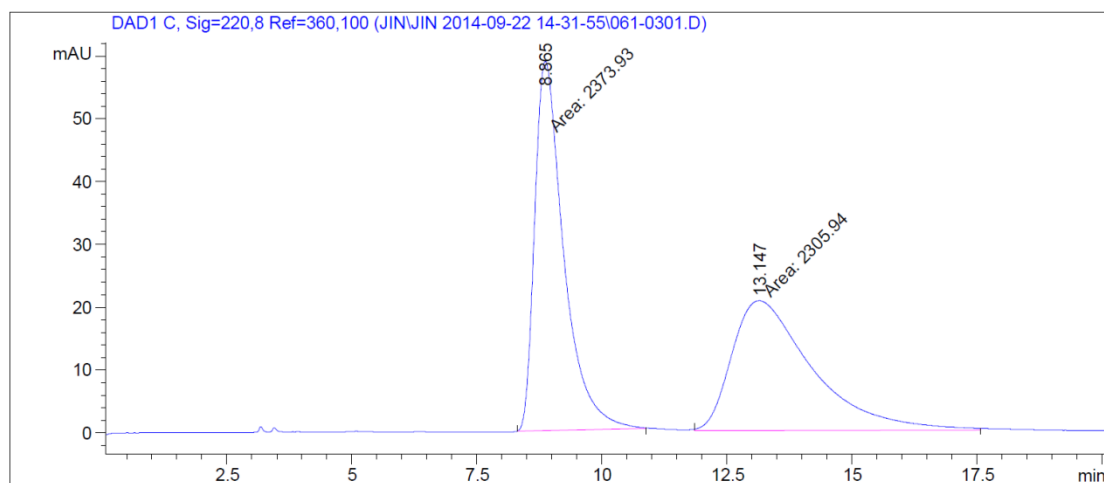

Signal 3: DAD1 C, Sig=220,8 Ref=360,100

| Peak # | RetTime [min] | Type | Width [min] | Area [mAU*s] | Height [mAU] | Area %  |
|--------|---------------|------|-------------|--------------|--------------|---------|
| 1      | 8.865         | MM   | 0.6728      | 2373.92944   | 58.80980     | 50.7265 |
| 2      | 13.147        | MM   | 1.8599      | 2305.93555   | 20.66365     | 49.2735 |

Enantiomerically enriched (95:5 er)

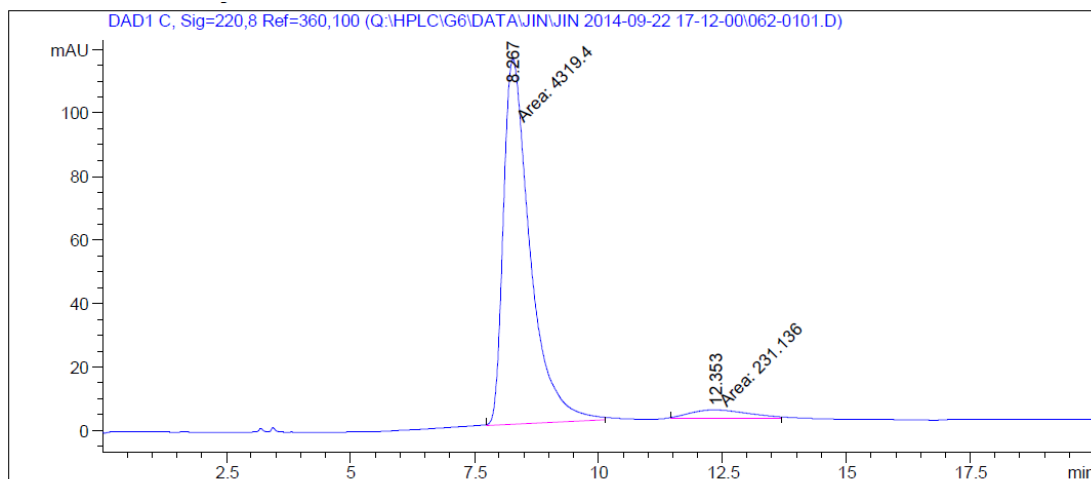

Signal 3: DAD1 C, Sig=220,8 Ref=360,100

| Peak # | RetTime [min] | Type | Width [min] | Area [mAU*s] | Height [mAU] | Area %  |
|--------|---------------|------|-------------|--------------|--------------|---------|
| 1      | 8.267         | MM   | 0.6258      | 4319.39697   | 115.02805    | 94.9207 |
| 2      | 12.353        | MM   | 1.3925      | 231.13589    | 2.76634      | 5.0793  |

*tert*-Butyl (*R*)-3-((4-methoxybenzyl)thio)-3-phenylpropanoate **4n**

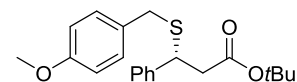

(Chiralpak AS-H, hexane/isopropanol = 100/0, 0.5 mL/min)

Racemic

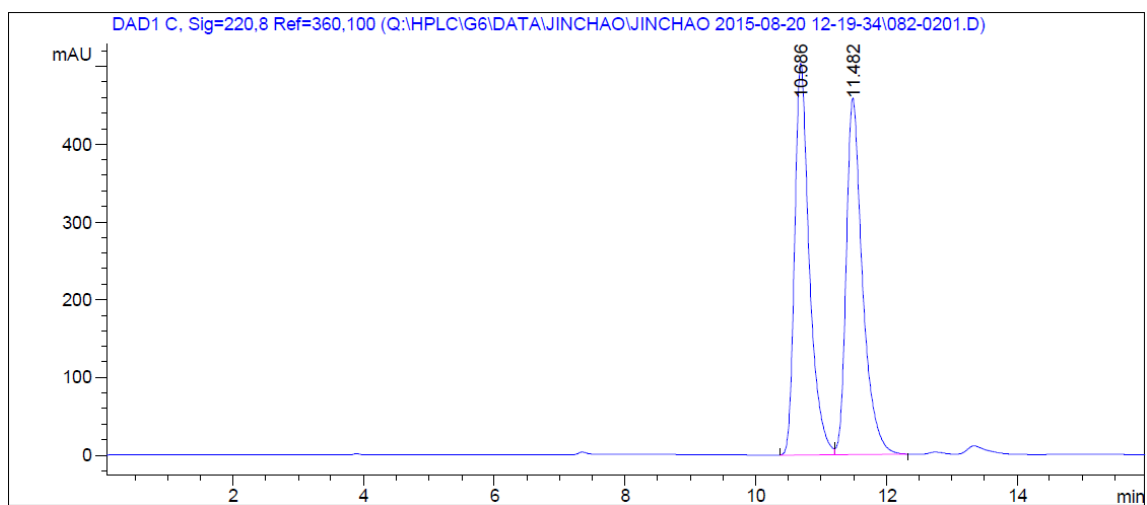

Signal 3: DAD1 C, Sig=220,8 Ref=360,100

| Peak # | RetTime [min] | Type | Width [min] | Area [mAU*s] | Height [mAU] | Area %  |
|--------|---------------|------|-------------|--------------|--------------|---------|
| 1      | 10.686        | BV   | 0.2346      | 7883.91064   | 503.62131    | 49.8419 |
| 2      | 11.482        | VB   | 0.2579      | 7933.92822   | 458.48947    | 50.1581 |

Enantiomerically enriched (88:12 er)

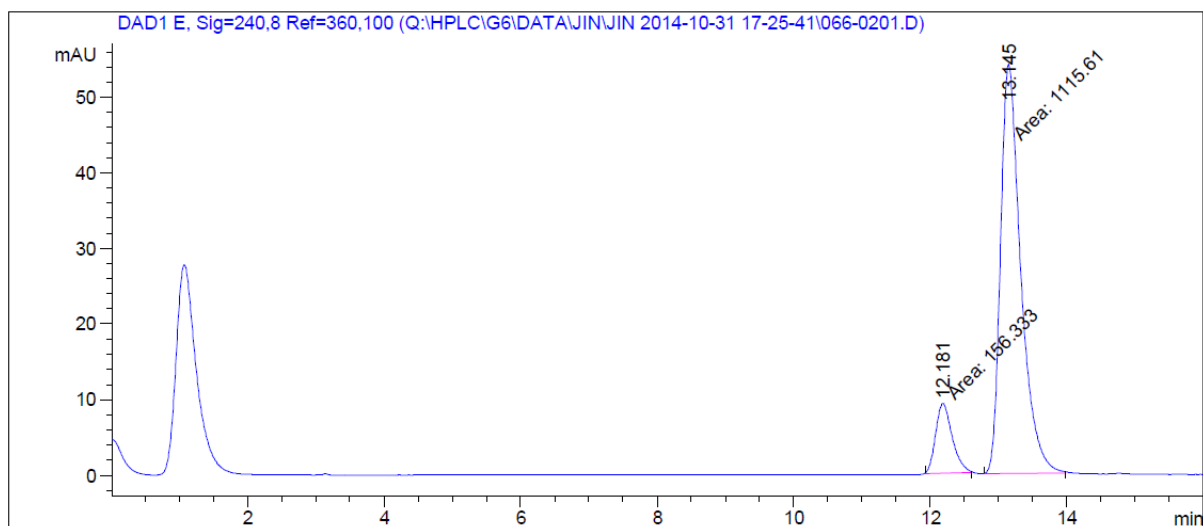

Signal 5: DAD1 E, Sig=240,8 Ref=360,100

| Peak # | RetTime [min] | Type | Width [min] | Area [mAU*s] | Height [mAU] | Area %  |
|--------|---------------|------|-------------|--------------|--------------|---------|
| 1      | 12.181        | MM   | 0.2820      | 156.33324    | 9.23939      | 12.2909 |
| 2      | 13.145        | MM   | 0.3432      | 1115.60718   | 54.18087     | 87.7091 |



*tert*-Butyl (*S*)-3-(propylthio)pentanoate **4o**

(Chiralpak IA, hexane/isopropanol = 100/0, 1.0 mL/min)

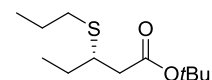

Racemic

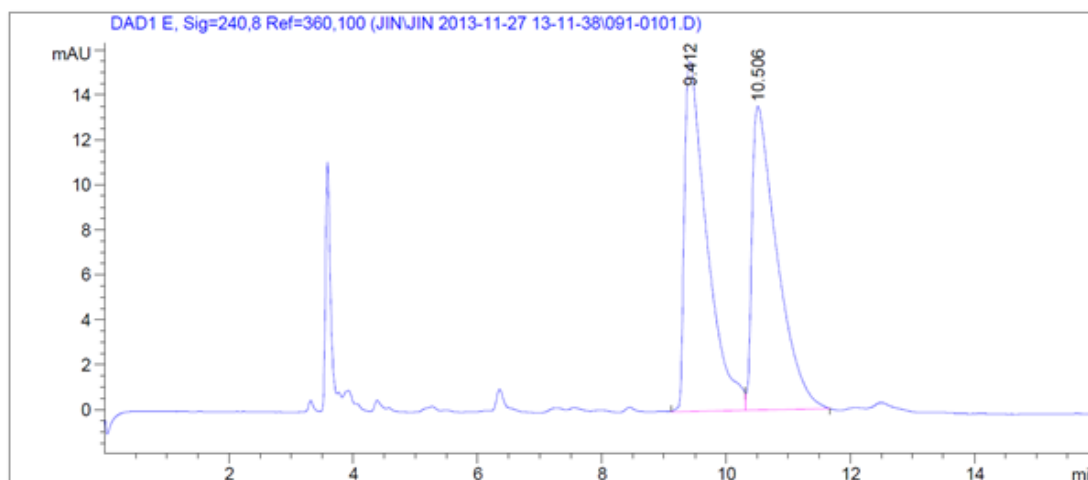

| Peak # | RetTime [min] | Type | Width [min] | Area [mAU*s] | Height [mAU] | Area %  |
|--------|---------------|------|-------------|--------------|--------------|---------|
| 1      | 9.412         | BV   | 0.3649      | 390.92239    | 15.56862     | 50.6792 |
| 2      | 10.506        | VB   | 0.4005      | 380.44342    | 13.51196     | 49.3208 |

Enantiomerically enriched (93:7 er)

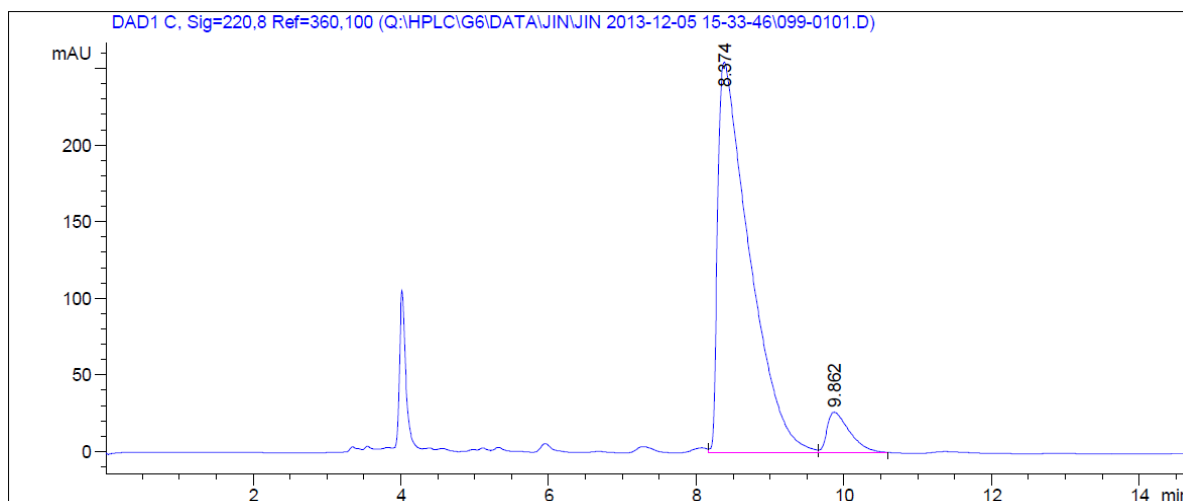

Signal 3: DAD1 C, Sig=220,8 Ref=360,100

| Peak # | RetTime [min] | Type | Width [min] | Area [mAU*s] | Height [mAU] | Area %  |
|--------|---------------|------|-------------|--------------|--------------|---------|
| 1      | 8.374         | VV   | 0.4239      | 7591.90527   | 254.59702    | 92.9248 |
| 2      | 9.862         | VB   | 0.3276      | 578.03796    | 26.59521     | 7.0752  |

*tert*-Butyl (*S*)-3-(propylthio)decanoate **4p**

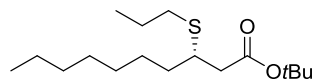

(Chiralpak IA, hexane/isopropanol = 100/0, 1.0 mL/min)

Racemic

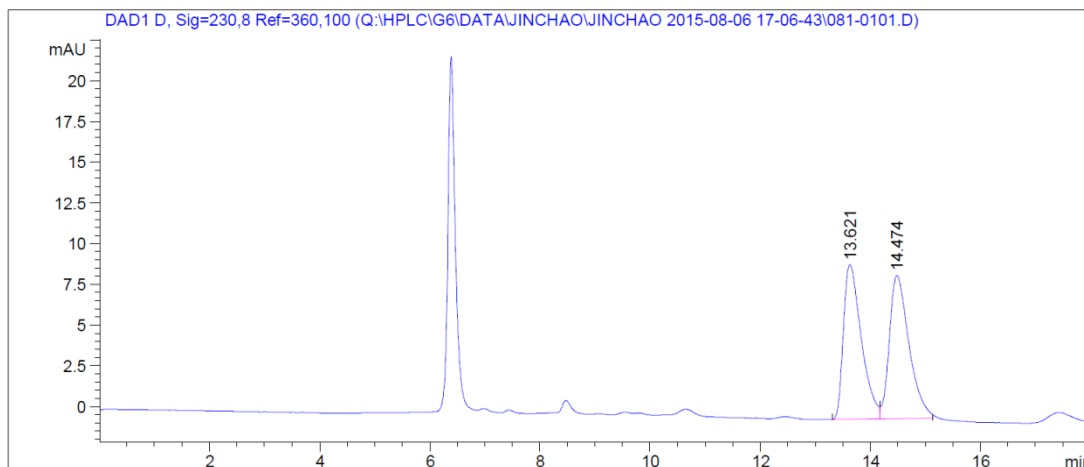

Signal 4: DAD1 D, Sig=230,8 Ref=360,100

| Peak # | RetTime [min] | Type | Width [min] | Area [mAU*s] | Height [mAU] | Area %  |
|--------|---------------|------|-------------|--------------|--------------|---------|
| 1      | 13.621        | BV   | 0.3411      | 213.85118    | 9.48187      | 49.5139 |
| 2      | 14.474        | VB   | 0.3735      | 218.05049    | 8.78591      | 50.4861 |

Enantiomerically enriched (92:8 er)

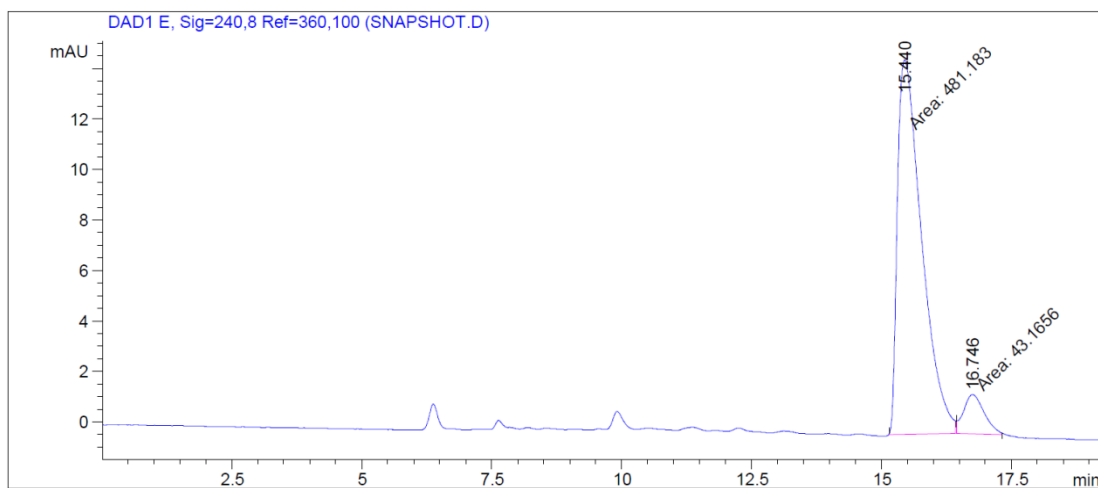

Signal 5: DAD1 E, Sig=240,8 Ref=360,100

| Peak # | RetTime [min] | Type | Width [min] | Area [mAU*s] | Height [mAU] | Area %  |
|--------|---------------|------|-------------|--------------|--------------|---------|
| 1      | 15.440        | MM   | 0.5403      | 481.18307    | 14.84291     | 91.7678 |
| 2      | 16.746        | MM   | 0.4631      | 43.16562     | 1.55355      | 8.2322  |

*tert*-Butyl (*S*)-3-(propylthio)hept-6-enoate **4q**  
 (Chiralpak IA, hexane/isopropanol = 100/0, 1.0 mL/min)

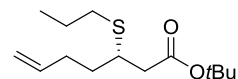

Racemic

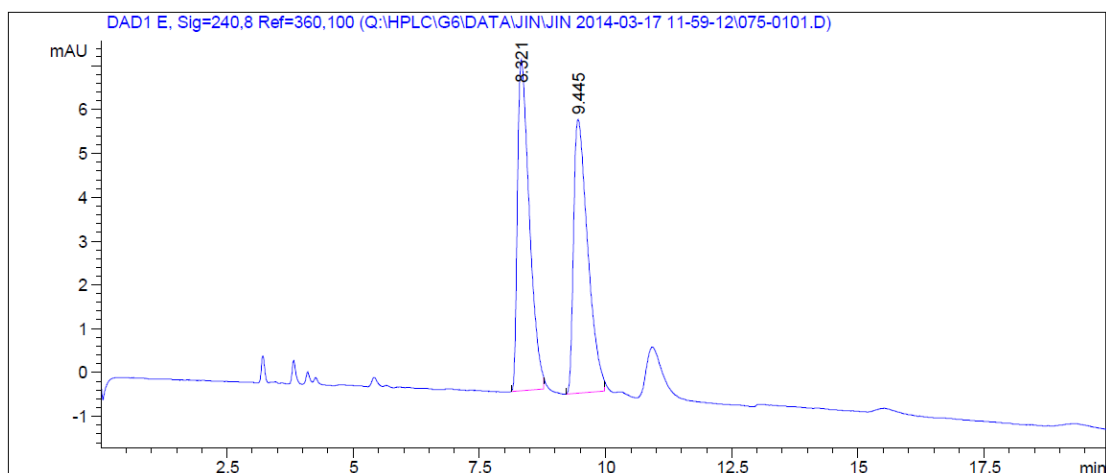

Signal 5: DAD1 E, Sig=240,8 Ref=360,100

| Peak # | RetTime [min] | Type | Width [min] | Area [mAU*s] | Height [mAU] | Area %  |
|--------|---------------|------|-------------|--------------|--------------|---------|
| 1      | 8.321         | BB   | 0.2490      | 123.80908    | 7.56425      | 50.3606 |
| 2      | 9.445         | BB   | 0.2938      | 122.03627    | 6.24959      | 49.6394 |

Enantiomerically enriched (94:6 er)

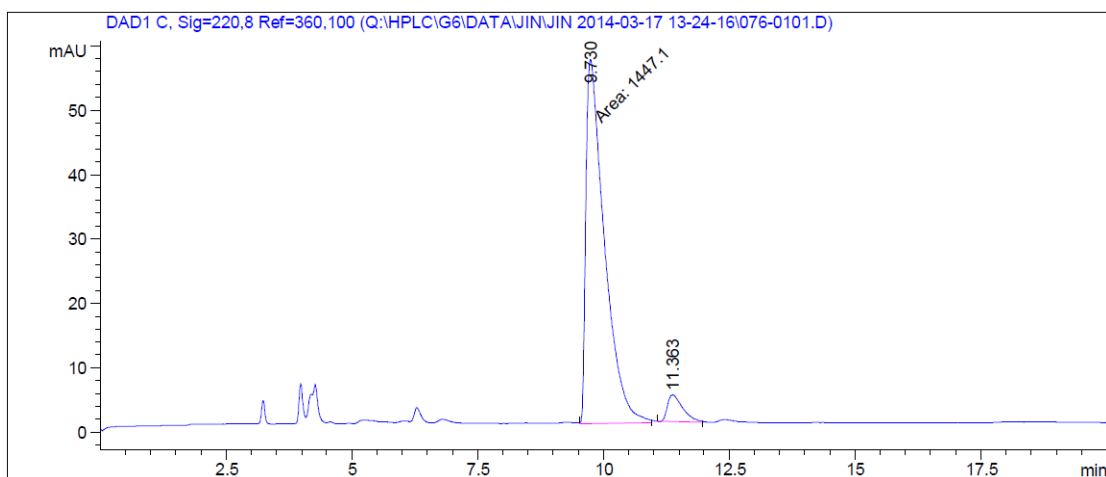

| Peak # | RetTime [min] | Type | Width [min] | Area [mAU*s] | Height [mAU] | Area %  |
|--------|---------------|------|-------------|--------------|--------------|---------|
| 1      | 9.730         | MM   | 0.4237      | 1438.33142   | 56.57480     | 94.2840 |
| 2      | 11.363        | BB   | 0.3147      | 87.19946     | 4.15688      | 5.7160  |

*tert*-Butyl (*S*)-5-phenyl-3-(propylthio)pentanoate **4r**  
 (Chiralpak IA, hexane/isopropanol = 100/0, 1.0 mL/min)

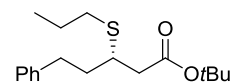

Racemic

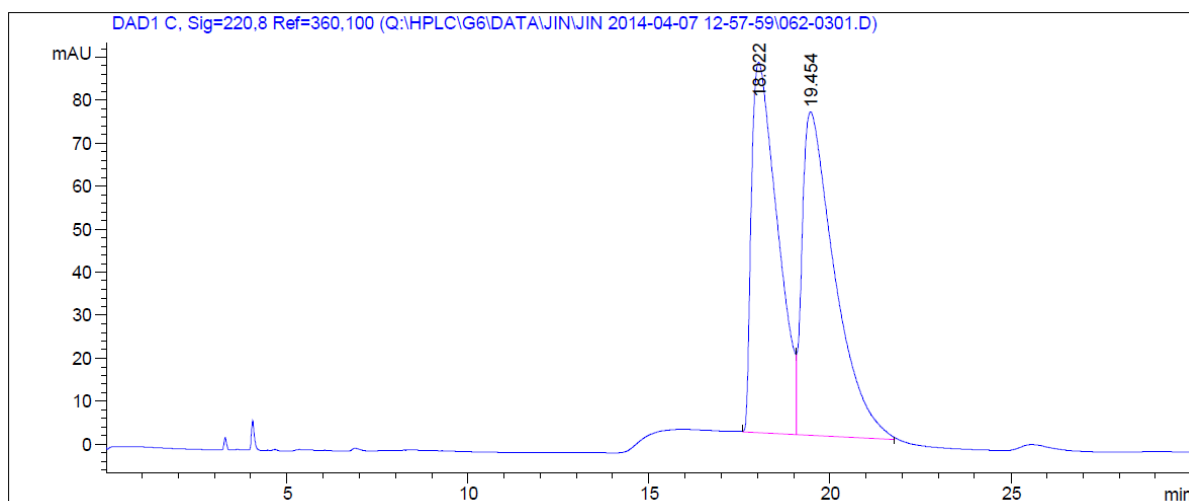

Signal 3: DAD1 C, Sig=220,8 Ref=360,100

| Peak # | RetTime [min] | Type | Width [min] | Area [mAU*s] | Height [mAU] | Area %  |
|--------|---------------|------|-------------|--------------|--------------|---------|
| 1      | 18.022        | BV   | 0.7339      | 4291.35791   | 86.03976     | 47.5955 |
| 2      | 19.454        | VB   | 0.9075      | 4724.94727   | 75.15421     | 52.4045 |

Enantiomerically enriched (94:6 er)

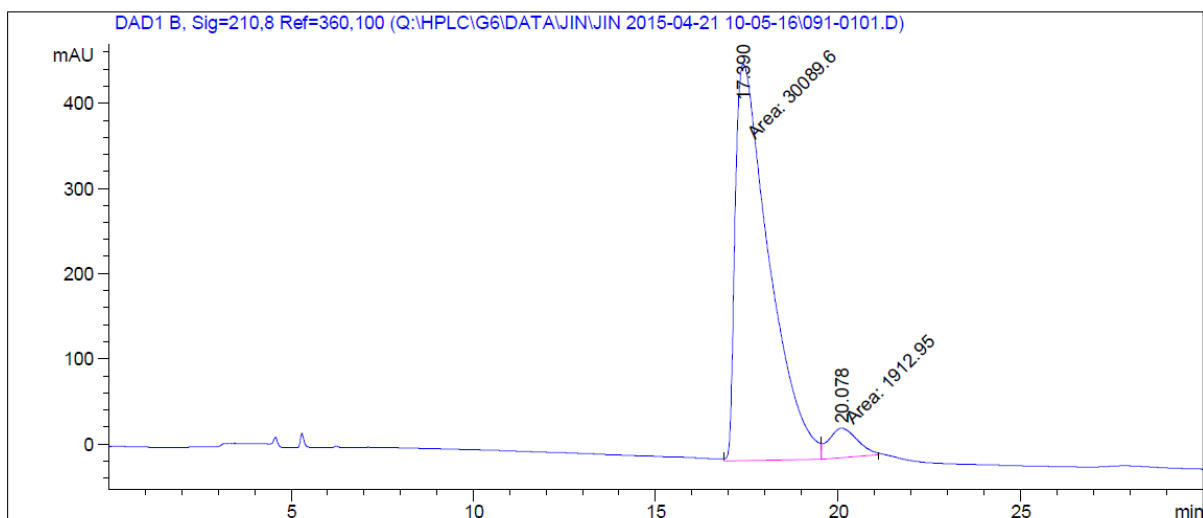

Signal 2: DAD1 B, Sig=210,8 Ref=360,100

| Peak # | RetTime [min] | Type | Width [min] | Area [mAU*s] | Height [mAU] | Area %  |
|--------|---------------|------|-------------|--------------|--------------|---------|
| 1      | 17.390        | MM   | 1.0769      | 3.00896e4    | 465.69724    | 94.0225 |
| 2      | 20.078        | MM   | 0.9175      | 1912.95203   | 34.74918     | 5.9775  |

*tert*-Butyl (*S*)-5-((*tert*-butoxycarbonyl)amino)-3-(propylthio)pentanoate **4s**

(Chiralpak AD-H, hexane/isopropanol = 99/1, 1.0 mL/min)

Racemic

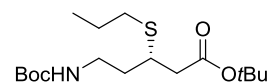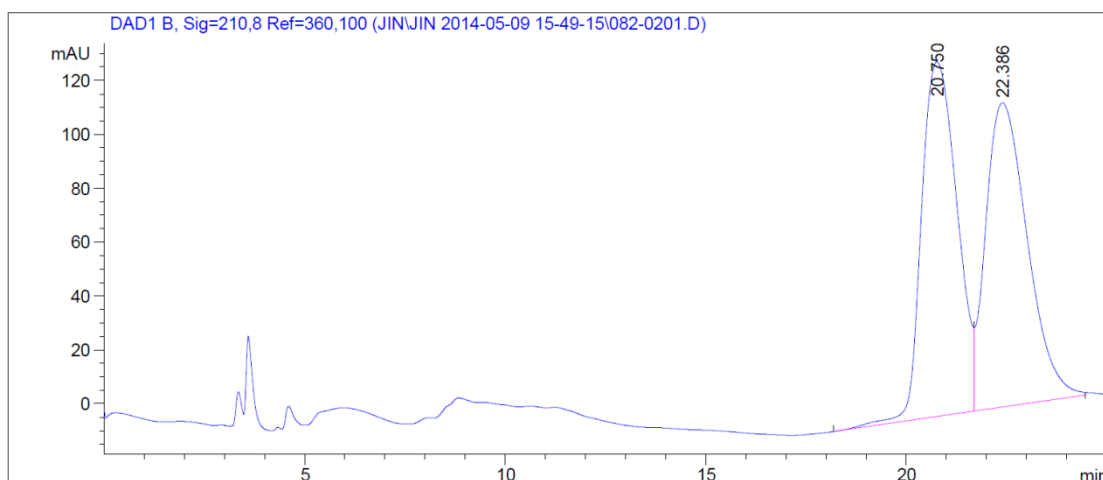

| Peak # | RetTime [min] | Type | Width [min] | Area [mAU*s] | Height [mAU] | Area %  |
|--------|---------------|------|-------------|--------------|--------------|---------|
| 1      | 20.750        | BV   | 0.9825      | 8089.42188   | 131.72157    | 49.8098 |
| 2      | 22.386        | VB   | 1.1300      | 8151.19873   | 112.94682    | 50.1902 |

Enantiomerically enriched (94:6 er)

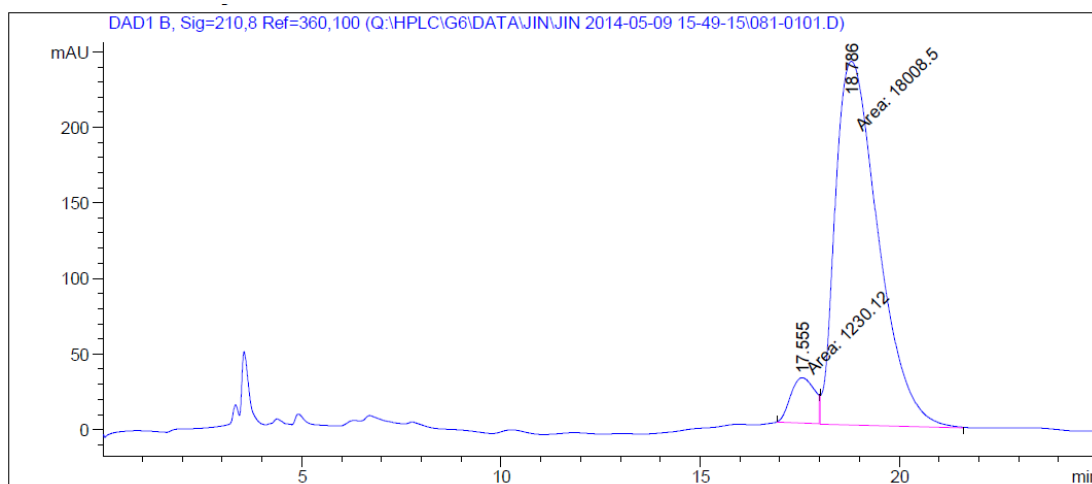

Signal 2: DAD1 B, Sig=210,8 Ref=360,100

| Peak # | RetTime [min] | Type | Width [min] | Area [mAU*s] | Height [mAU] | Area %  |
|--------|---------------|------|-------------|--------------|--------------|---------|
| 1      | 17.555        | MM   | 0.6863      | 1230.11829   | 29.87365     | 6.3940  |
| 2      | 18.786        | MM   | 1.2488      | 1.80085e4    | 240.35182    | 93.6060 |

*tert*-Butyl (*S*)-5-((*tert*-butyldimethylsilyl)oxy)-3-(propylthio)pentanoate **4t**

(Chiralpak IA, hexane/isopropanol = 100/0, 1.0 mL/min)  
Racemic

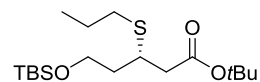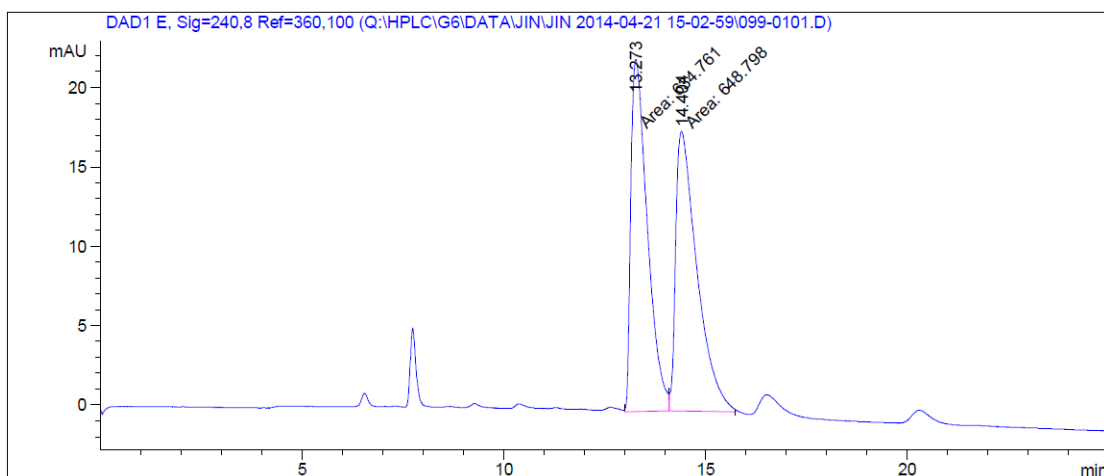

Signal 4: DAD1 D, Sig=230,8 Ref=360,100

| Peak # | RetTime [min] | Type | Width [min] | Area [mAU*s] | Height [mAU] | Area %  |
|--------|---------------|------|-------------|--------------|--------------|---------|
| 1      | 13.273        | BB   | 0.4343      | 1185.56799   | 41.62608     | 49.7337 |
| 2      | 14.405        | BB   | 0.5257      | 1198.26245   | 32.99532     | 50.2663 |

Enantiomerically enriched (94:6 er)

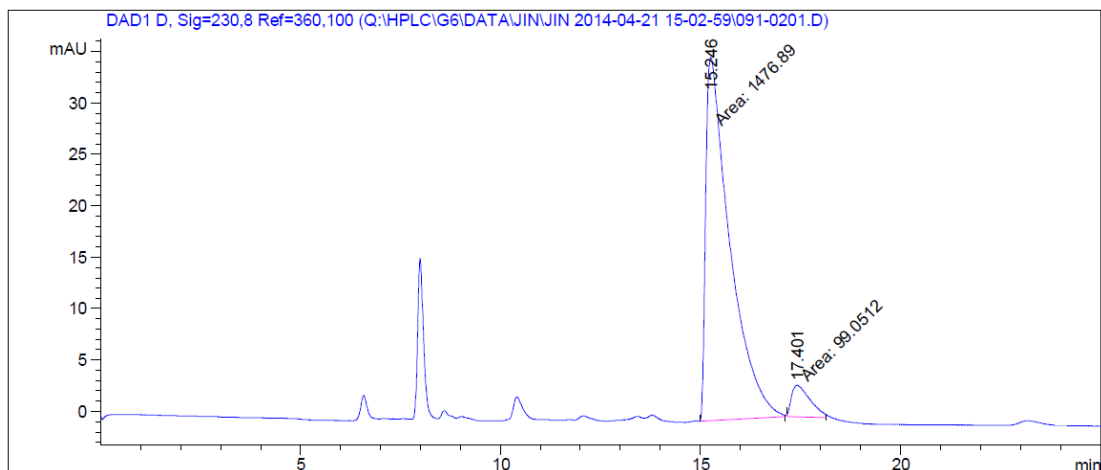

Signal 4: DAD1 D, Sig=230,8 Ref=360,100

| Peak # | RetTime [min] | Type | Width [min] | Area [mAU*s] | Height [mAU] | Area %  |
|--------|---------------|------|-------------|--------------|--------------|---------|
| 1      | 15.246        | MM   | 0.6967      | 1476.89294   | 35.33311     | 93.7148 |
| 2      | 17.401        | MM   | 0.5397      | 99.05119     | 3.05866      | 6.2852  |

## HPLC chromatogram of 4e for Section 1.6

*tert*-Butyl (*S*)-3-(propylthio)butanoate **4e**

(Chiralpak IA, hexane/isopropanol = 100/0, 1 mL/min)

Enantiomerically enriched (94:6 er)

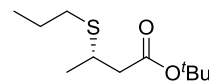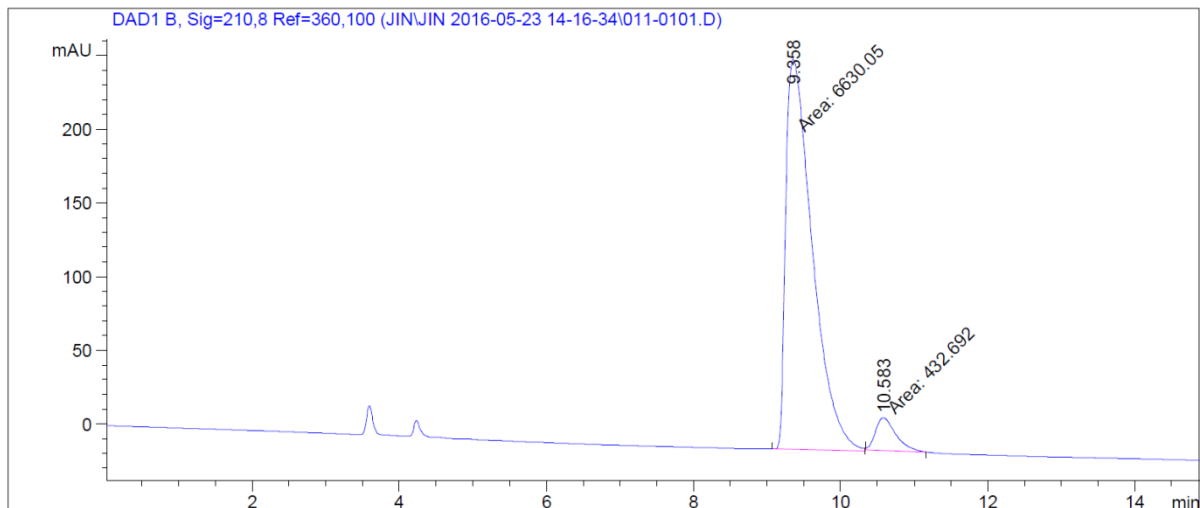

Signal 2: DAD1 B, Sig=210,8 Ref=360,100

| Peak # | RetTime [min] | Type | Width [min] | Area [mAU*s] | Height [mAU] | Area %  |
|--------|---------------|------|-------------|--------------|--------------|---------|
| 1      | 9.358         | MM   | 0.4177      | 6630.05322   | 264.54739    | 93.8736 |
| 2      | 10.583        | MM   | 0.3235      | 432.69229    | 22.28986     | 6.1264  |

## HPLC chromatograms for Section 1.7

*tert*-Butyl (*S*)-3-(propylsulfonyl)butanoate **5a**

(Chiralpak IA, hexane/isopropanol = 95/5, 1.0 mL/min)

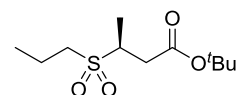

Racemic

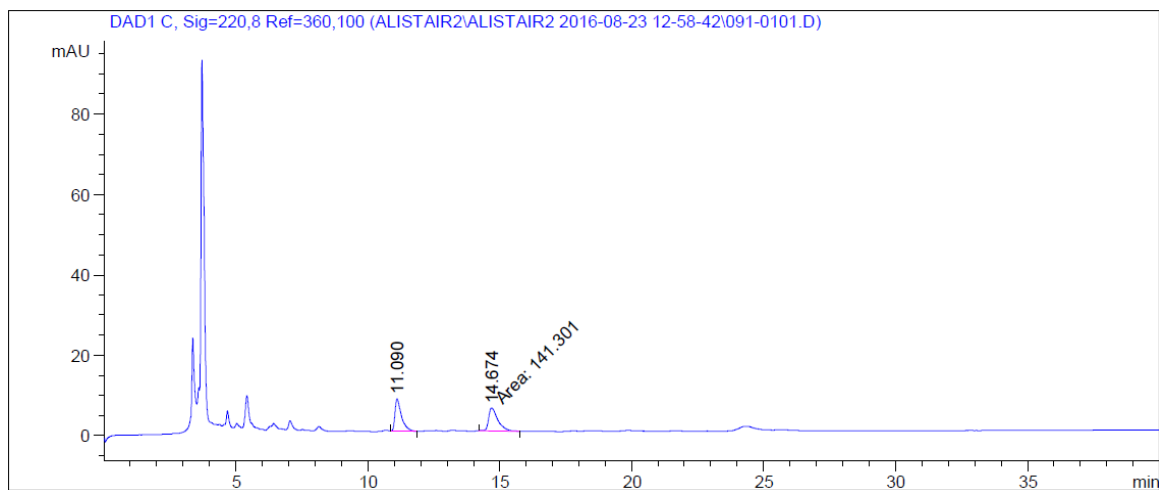

Signal 3: DAD1 C, Sig=220,8 Ref=360,100

| Peak # | RetTime [min] | Type | Width [min] | Area [mAU*s] | Height [mAU] | Area %  |
|--------|---------------|------|-------------|--------------|--------------|---------|
| 1      | 11.090        | VB   | 0.2591      | 141.76266    | 8.06321      | 50.0816 |
| 2      | 14.674        | MM   | 0.4085      | 141.30054    | 5.76556      | 49.9184 |

Totals : 283.06320 13.82877

Enantiomerically enriched (94:6 er)

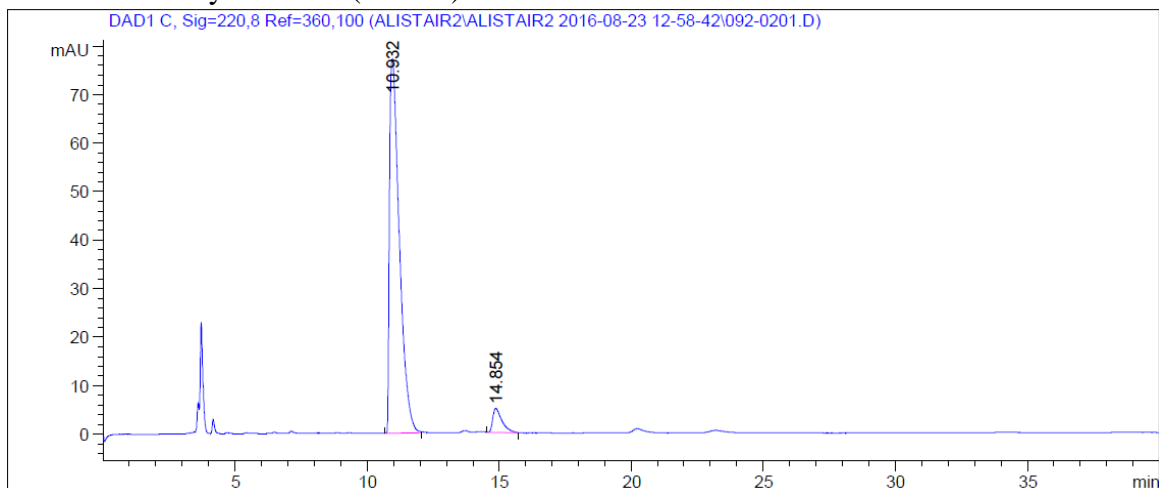

Signal 3: DAD1 C, Sig=220,8 Ref=360,100

| Peak # | RetTime [min] | Type | Width [min] | Area [mAU*s] | Height [mAU] | Area %  |
|--------|---------------|------|-------------|--------------|--------------|---------|
| 1      | 10.932        | BB   | 0.3953      | 1990.68152   | 77.08029     | 94.3647 |
| 2      | 14.854        | BB   | 0.3596      | 118.88119    | 4.96119      | 5.6353  |

Totals : 2109.56271 82.04148



# Methyl (S)-3-(propylthio)butanoate **4a**

(Chiralpak IA, hexane/isopropanol = 100/0, 1.0 mL/min)

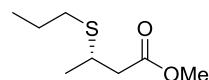

Racemic

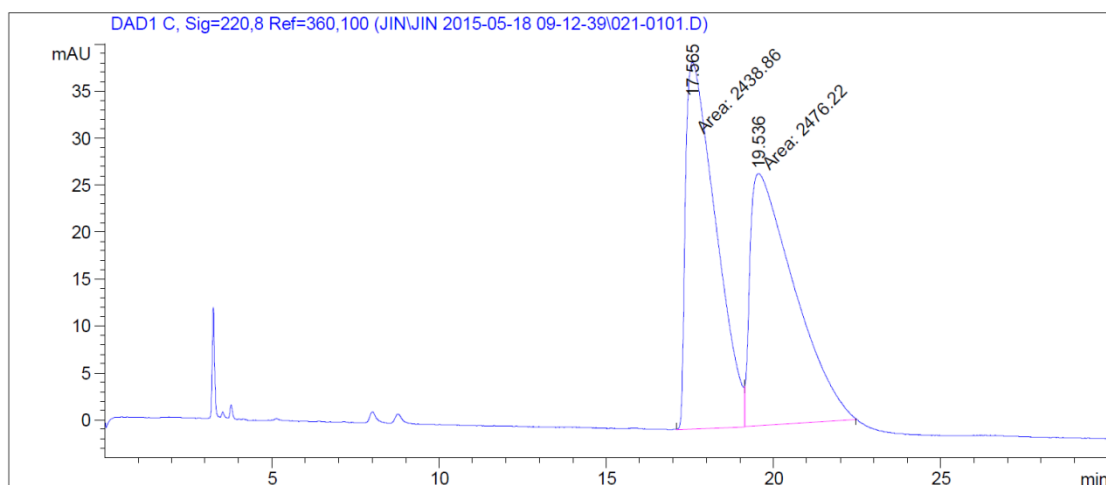

Signal 3: DAD1 C, Sig=220,8 Ref=360,100

| Peak # | RetTime [min] | Type | Width [min] | Area [mAU*s] | Height [mAU] | Area %  |
|--------|---------------|------|-------------|--------------|--------------|---------|
| 1      | 17.565        | MM   | 1.0410      | 2438.85913   | 39.04567     | 49.6199 |
| 2      | 19.536        | MM   | 1.5400      | 2476.22363   | 26.79920     | 50.3801 |

Enantiomerically enriched (94:6 er)

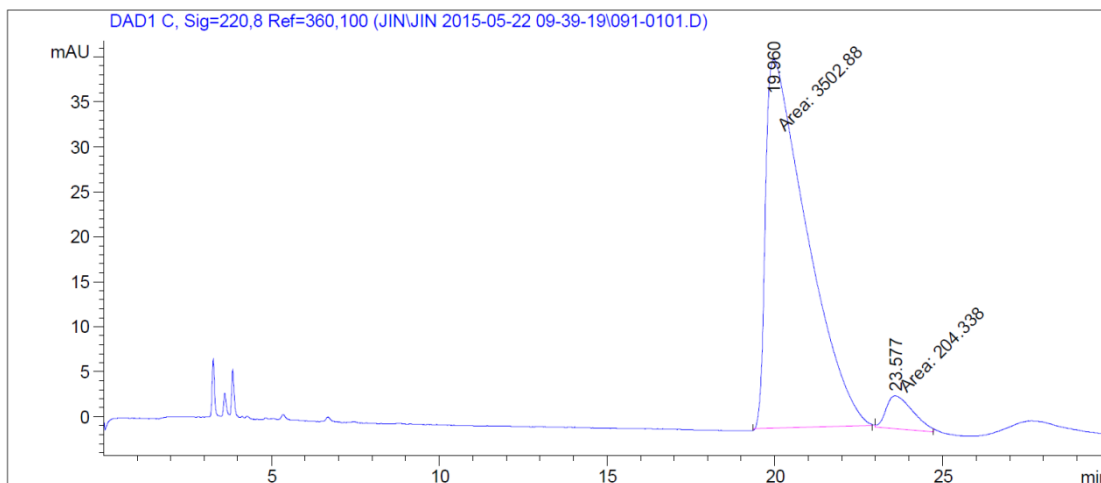

Signal 3: DAD1 C, Sig=220,8 Ref=360,100

| Peak # | RetTime [min] | Type | Width [min] | Area [mAU*s] | Height [mAU] | Area %  |
|--------|---------------|------|-------------|--------------|--------------|---------|
| 1      | 19.960        | MM   | 1.4245      | 3502.88037   | 40.98492     | 94.4881 |
| 2      | 23.577        | MM   | 0.9312      | 204.33829    | 3.65733      | 5.5119  |

(S)-3-((4-Methoxybenzyl)thio)butan-1-ol **5b**

(Chiralpak AD-H, hexane/isopropanol = 97/3, 1.0 mL/min)

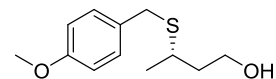

Racemic

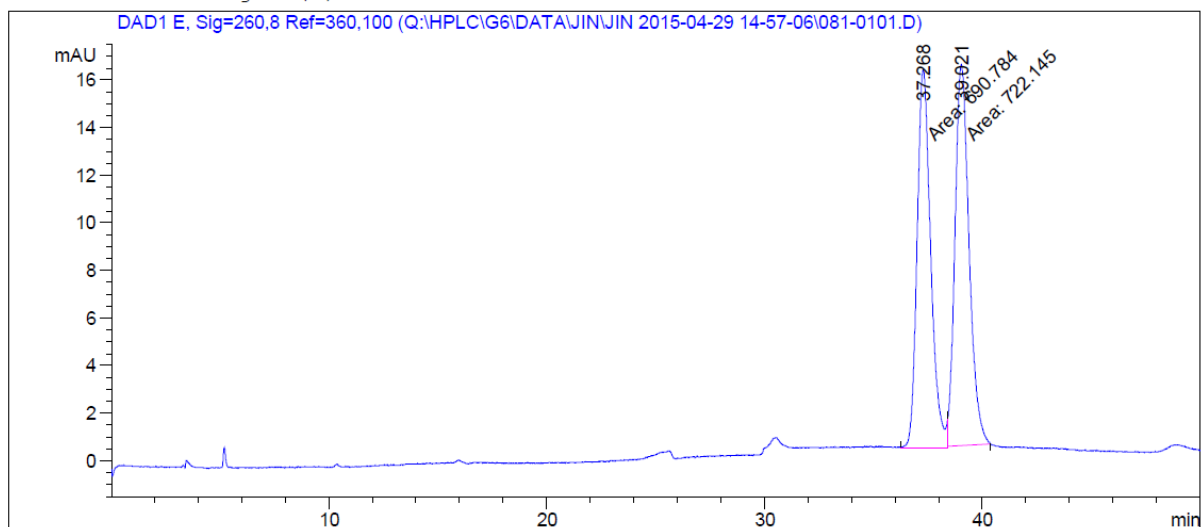

Signal 5: DAD1 E, Sig=260,8 Ref=360,100

| Peak # | RetTime [min] | Type | Width [min] | Area [mAU*s] | Height [mAU] | Area %  |
|--------|---------------|------|-------------|--------------|--------------|---------|
| 1      | 37.268        | MM   | 0.7240      | 690.78394    | 15.90182     | 48.8902 |
| 2      | 39.021        | MM   | 0.7515      | 722.14496    | 16.01645     | 51.1098 |

Enantiomerically enriched (93:7 er)

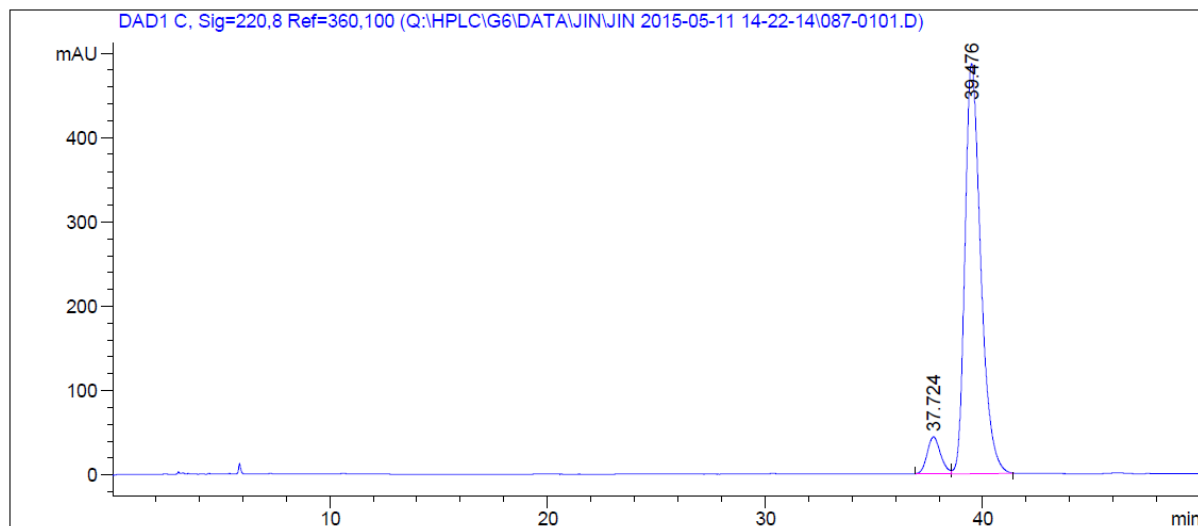

| Peak # | RetTime [min] | Type | Width [min] | Area [mAU*s] | Height [mAU] | Area %  |
|--------|---------------|------|-------------|--------------|--------------|---------|
| 1      | 37.724        | BV   | 0.6655      | 1886.90698   | 43.89383     | 7.1179  |
| 2      | 39.476        | VB   | 0.7723      | 2.46224e4    | 486.62790    | 92.8821 |

## HPLC chromatograms for Section 1.8

1,1,1,3,3,3-Hexafluoropropan-2-yl (*R*)-3-((4-methoxybenzyl)thio)-3-phenylpropanoate **12**

(Chiralpak AS-H, hexane/isopropanol = 99/1, 1.0

mL/min)

Racemic

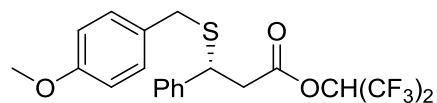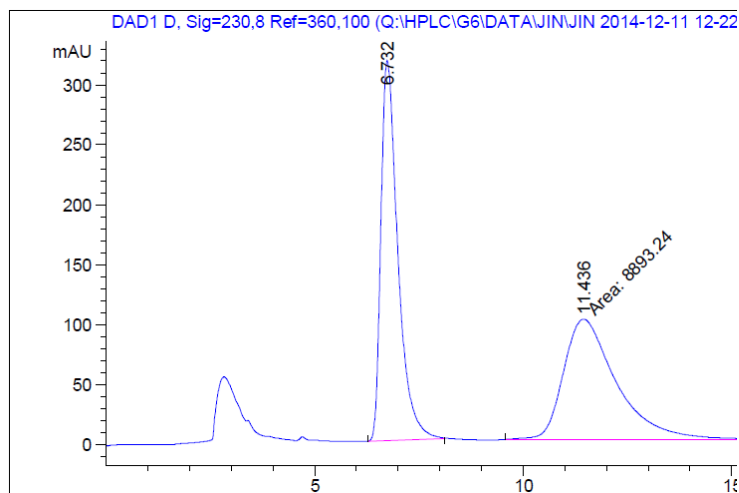

Signal 4: DAD1 D, Sig=230,8 Ref=360,100

| Peak # | RetTime [min] | Type | Width [min] | Area [mAU*s] | Height [mAU] | Area %  |
|--------|---------------|------|-------------|--------------|--------------|---------|
| 1      | 6.732         | BB   | 0.4254      | 8948.48828   | 316.98099    | 50.1548 |
| 2      | 11.436        | MM   | 1.4749      | 8893.24316   | 100.49656    | 49.8452 |

Enantiomerically enriched (90:10 er)

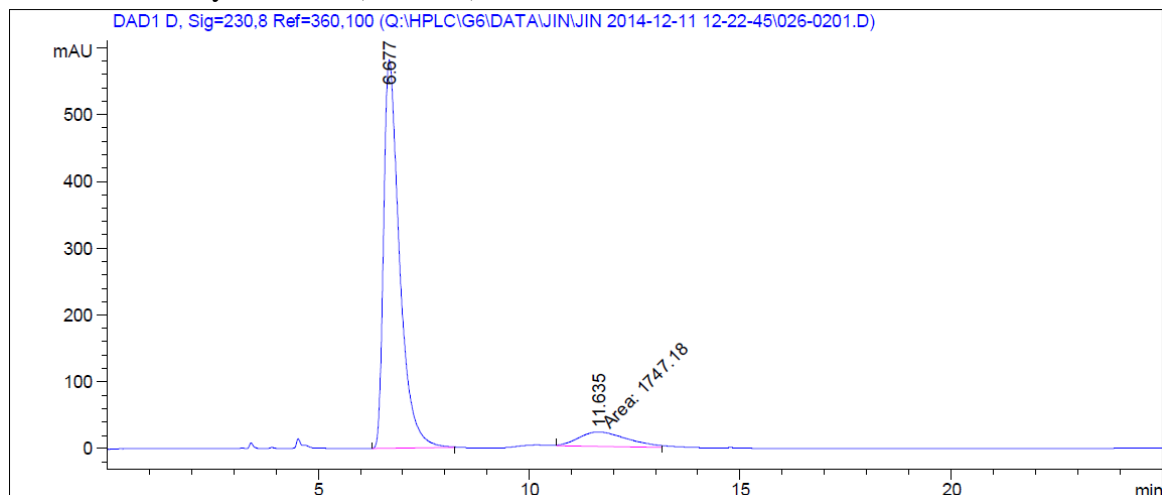

Signal 4: DAD1 D, Sig=230,8 Ref=360,100

| Peak # | RetTime [min] | Type | Width [min] | Area [mAU*s] | Height [mAU] | Area %  |
|--------|---------------|------|-------------|--------------|--------------|---------|
| 1      | 6.677         | BB   | 0.3937      | 1.52227e4    | 581.00500    | 89.7042 |
| 2      | 11.635        | MM   | 1.3463      | 1747.18091   | 21.62953     | 10.2958 |
